# Supplementary material
Source: publisher site journal article supplement (https://www.dovepress.com/article/267448)
Supplement: Supplementary file 1 [file get_supplementary_file.php]

**Supplemental Files**

It is our intent to provide these materials, referred to in the article as Appendices A through J, as supplemental material that can be made available to readers electronically.

**Appendix A: Search Terms**

Search terms were often updated throughout the year, as Academy of Integrative Pain Management policy staff became aware of emerging and evolving terminology, new issues being considered by the legislatures, etc., so while this document includes the search terms used in the tracking software (CQ StateTrack) each year, those terms were not always used as presented throughout the entirety of the year in question. However, when terms were added later in the year, the software identified any existing legislation or regulation containing those terms. Thus, the results from the last search of the year should include all of the policies containing those terms, and those more comprehensive results populated the database from which the data reported in this study were gleaned.

Policies identified by these searches included some that did not relate to opioid prescribing. To construct the report requested by FDA and summarized in this article, each policy in the existing database was reviewed by the first author and included or excluded from the original report. The second author was consulted if the inclusion/exclusion decision was not clear, and consensus of the two authors was used to determine if a policy should be included.

An asterisk, when used in a search query, allows the search engine to replace the asterisk as needed. For example, “addict*” would allow the search engine to identify: addiction, addicted, addicting, etc.

**2016**

Exact words or phrases:

Pain Management

Chronic Pain

Pill Mill

Telehealth

Tele-health

Telemedicine

Tele-medicine

Controlled Drug*

Combinations of words and phrases:

1. One of the words/phrases from List 1 must be within 350 words of one of the words/phrases from List 2.

List 1: addict*, controlled drug, controlled substance, Fentanyl, Fibromyalgia, headache, migraine, Hydrocodone, Hydromorphone, Migraine, Morphine, Opiate, Opioid, Osteoarthritis, Oxycodone, Oxymorphone, Methadone, Codeine, Tramadol, Naloxone, Suboxone, Naltrexone, Reflex Sympathetic Dystrophy, schedule II

List 2: addict*, abus*, Healthcare, Health Care, Diversion, Divert*, Doctor, Medical, Medicine, misuse, misusing, Nurse*, Pain, Pharmaceutical*, Pharmacies, Pharmacy, Physician, Practitioner*, Prescrib*, Prescription*, Schedule II

1. Any of the following words/phrases must be found within 75 words of the word: Synchroniz*

patient medic*

prescri*

chronic illness

pharmac* drug

1. One of the following words must be found within 350 words of the word: Pain

Arthritis

complex regional pain syndrome

long-term

Chronic

Healthcare

Health Care Doctor

Medical

Medicine

Nurse*

Pain

Pharmaceutical*

Pharmacies

Pharmacy

Physician

Practitioner*

Prescrib*

Prescription*

Schedule II

Integrative

Interdisciplinary

Multidisciplinary

Educat*

Train*

Palliative

acupuncture

chiropract*

physical therap*

massage

1. One of the words/phrases from List 1 must be within 350 words of one of the words/phrases from List 2.

List 1: data fund, database, monitor, monitoring, prior authorization, step therapy, specialty tier

List 2: controlled substance, drug, Pharmaceutical, Pharmacies, Pharmacy, Physician, Practitioner*, Prescrib*, Prescription*, Schedule II

**2017**

Exact words or phrases:

Pain Management

Chronic Pain

Pill Mill

Telehealth

Tele-health

Telemedicine

Tele-medicine

Controlled Drug*

Continuity of Care

Non-Medical Switching

Combinations of words and phrases:

1. One of the words/phrases from List 1 must be within 350 words of one of the words/phrases from List 2.

List 1: addict*, controlled drug, controlled substance, Fentanyl, Fibromyalgia, headache, migraine, Hydrocodone, Hydromorphone, Migraine, Morphine, Opiate, Opioid, Osteoarthritis, Oxycodone, Oxymorphone, Methadone, Codeine, Tramadol, Naloxone, Suboxone, Naltrexone, Reflex Sympathetic Dystrophy, schedule II

List 2: addict*, abus*, Healthcare, Health Care, Diversion, Divert*, Doctor, Medical, Medicine, misuse, misusing, Nurse*, Pain, Pharmaceutical*, Pharmacies, Pharmacy, Physician, Practitioner*, Prescrib*, Prescription*, Schedule II

1. Any of the following words/phrases must be found within 75 words of the word: Synchroniz*

patient medic*

prescri*

chronic illness

pharmac* drug

1. One of the following words must be found within 350 words of the word: Pain

Arthritis

complex regional pain syndrome

long-term

Chronic

Healthcare

Health Care Doctor

Medical

Medicine

Nurse*

Pain

Pharmaceutical*

Pharmacies

Pharmacy

Physician

Practitioner*

Prescrib*

Prescription*

Schedule II

Integrative

Interdisciplinary

Multidisciplinary

Educat*

Train*

Palliative

acupuncture

chiropract*

physical therap*

massage

1. One of the words/phrases from List 1 must be within 350 words of one of the words/phrases from List 2.

List 1: data fund, database, monitor, monitoring, prior authorization, step therapy, specialty tier

List 2: controlled substance, drug, Pharmaceutical, Pharmacies, Pharmacy, Physician, Practitioner*, Prescrib*, Prescription*, Schedule II

**2018**

Exact words or phrases:

Pain Management

Pain Care

Acute Pain

Painkiller

Pain Medication

Medical Marijuana

Medical Marihuana

Medical Cannabis

Medicinal Cannabis

Medicinal Marijuana

Chronic Pain

Pill Mill

Telehealth

Tele-health

Telemedicine

Tele-medicine

Continuity of Care

Non-Medical Switching

Combinations of words and phrases:

1. One of the words/phrases from List 1 must be within 350 words of one of the words/phrases from List 2.

List 1: addict*, controlled drug, controlled substance, Fentanyl, Fibromyalgia, headache, migraine, Hydrocodone, Hydromorphone, Migraine, Morphine, Opiate, Opioid, Osteoarthritis, Oxycodone, Oxymorphone, Methadone, Codeine, Tramadol, Naloxone, Suboxone, Naltrexone, Reflex Sympathetic Dystrophy, schedule II

List 2: addict*, abus*, Healthcare, Health Care, Diversion, Divert*, Doctor, Medical, Medicine, misuse, misusing, Nurse*, Pain, Pharmaceutical*, Pharmacies, Pharmacy, Physician, Practitioner*, Prescrib*, Prescription*, Schedule II, morphine milligram equivalent

1. Any of the following words/phrases must be found within 75 words of the word: Synchroniz*

patient medic*

prescri*

chronic illness

pharmac* drug

1. One of the following words must be found within 350 words of the word: Pain

Arthritis

Complex regional pain syndrome

Long-term

Chronic

Healthcare

Health Care Doctor

Medical

Medicine

Nurse*

Pain

Pharmaceutical*

Pharmacies

Pharmacy

Physician

Practitioner*

Prescrib*

Prescription*

Schedule II

Integrative

Interdisciplinary

Multidisciplinary

Educat*

Train*

Palliative

Acupuncture

Chiropract*

Physical therap*

Massage

Care team

Complementary

1. One of the words/phrases from List 1 must be within 350 words of one of the words/phrases from List 2.

List 1: data fund, database, monitor, monitoring, prior authorization, step therapy, specialty tier, fail first, non-medical switching, utilization review, out-of-pocket, continuity of care, cost sharing, limit copay, copay limit*, biologic, biosimilar, forced off-label, midyear, mid-year

List 2: controlled substance, drug, Pharmaceutical, Pharmacies, Pharmacy, Physician, Practitioner*, Prescrib*, Prescription*, Schedule II, patient

Appendix B: Government Opioid Prescribing Policies

| **Jurisdiction** | **Year** | **Enacted**  **As or By** | **Bill**  **Number** | **Title** | **How Policy Affects Opioid Prescribing** |
| --- | --- | --- | --- | --- | --- |
| United  States | 2016 | Public Law 114-255 | HR 34 | 21st Century Cures Act | Established an account within the Treasury known as the “Account for the State Response to the Opioid Abuse Crisis.” Directed the transfer of funds from the general account into this new account in the amounts of $500M/year in 2017 and 2018. Creates the Opioid Grant Program for States addressing substance abuse prevention and treatment, including: improving prescription monitoring programs; implementing prevention activities; training healthcare practitioners in best practices for prescribing opioids and treating pain; supporting access to healthcare services; and, other activities. |
| United  States | 2016 | Public Law 114-145 | S 483 | Ensuring Patient Access and Effective Drug Enforcement Act of 2016 | Revised and expanded the required elements of an order to show cause issued by the DEA before it denies, revokes, or suspends a registration for a Controlled Substances Act violation. An order to show cause must specifically state the legal basis for the action and notify the registrant of the opportunity to submit a corrective action plan. Further, requires FDA, SAMHSA, AHRQ, and CDC, in coordination with DEA, to report to Congress on: obstacles to legitimate patient access to controlled substances; diversion of controlled substances; how agency and pharmaceutical manufacturer collaboration can address these issues; enhancements to PDMPs; the availability of and gaps in medical education, training opportunities, and comprehensive clinical guidance for pain management and opioid prescribing; and, improvements to prescription opioid reporting requirements to that the Public and Congress have more information re: opioids prescribed annually, dispensing, outliers and trends. |
| United  States | 2016 | Public Law 114-198 | S 524 | Comprehensive Addiction and Recovery Act of 2016 | Expands prevention and educational efforts—particularly aimed at teens, parents and other caretakers, and aging populations—to prevent the abuse of methamphetamines, opioids and heroin, and to promote treatment and recovery. Expand disposal sites for unwanted prescription medications to keep them out of the hands of our children and adolescents. Launch an evidence-based opioid and heroin treatment and intervention program to expand best practices throughout the country. Strengthen prescription drug monitoring programs to help states monitor and track prescription drug diversion and to help at-risk individuals access services. Allows for the partial filling of Schedule II controlled substances (would require DEA to update regulations). |
| United  States | 2016 | Centers for Disease Control and Prevention | n/a | CDC Guideline for Prescribing Opioids for Chronic Pain — United States, 2016 | Provides recommendations for primary care clinicians who are prescribing opioids for chronic pain outside of active cancer treatment, palliative care, and end-of-life care. The guideline addresses 1) when to initiate or continue opioids for chronic pain; 2) opioid selection, dosage, duration, follow-up, and discontinuation; and 3) assessing risk and addressing harms of opioid use. The guideline is intended to improve communication between clinicians and patients about the risks and benefits of opioid therapy for chronic pain, improve the safety and effectiveness of pain treatment, and reduce the risks associated with long-term opioid therapy, including opioid use disorder, overdose, and death. CDC has provided a checklist for prescribing opioids for chronic pain (http://stacks.cdc.gov/view/cdc/38025) as well as a website (http://www.cdc.gov/drugoverdose/prescribingresources.html) with additional tools to guide clinicians in implementing the recommendations. |
| United  States | 2016 | Centers for Medicare and Medicaid Services | n/a | Opioid Misuse Strategy 2016 | CMS effort includes four priority areas: 1) Implement more effective person-centered and population-based strategies to reduce the risk of opioid use disorders, overdoses, inappropriate prescribing, and drug diversion; 2) Expand naloxone use, distribution, and access, when clinically appropriate; 3) Expand screening, diagnosis, and treatment of opioid use disorders, with emphasis on increasing access to medication-assisted treatment; and 4) Increase use of evidence-based practices for acute and chronic pain management. |
| United  States | 2016 | Centers for Medicare and Medicaid Services | n/a | CMCS Informational Bulletin: Best Practices for Addressing Prescription Opioid Overdoses, Misuse and Addiction | The purpose of this Bulletin is to highlight emerging Medicaid strategies for preventing opioid-related harms. Strategies included relate to: provider education, preferred drug list, clinical criteria, step therapy, prior authorization, quantity limits, drug utilization review, use of PDMPs, patient review and restriction programs, use of naloxone, and coverage for SUD treatment, |
| United  States | 2016 | Department of Veterans Affairs | n/a | Pain Management Opioid Taper Decision Tool, A VA Clinician's Guide | The Opioid Taper Decision Tool is designed to assist Primary Care providers in determining if an opioid taper is necessary for a specific patient, in performing the taper, and in providing follow-up and support during the taper. |
| Alabama | 2016 | Alabama Board of Medical Examiners | n/a | 540-x-19-.05 Training Requirements; Medical Director; Other Requirements | Revises training/education/qualification requirements related to medical directors of pain management clinics. |
| Alaska | 2016 | CHAPTER 25 SLA 16 | SB 74 | Medicaid Reform; Telemedicine; Drug Database | Contains a directive to the licensing boards (Medical, Dental, Nursing, Optometry, Pharmacy) to jointly prepare a report that describes recommended guidelines for the prescription of Schedule II controlled substances. Requires licensed prescribers with DEA numbers to register with the PDMP. |
| Alaska | 2016 | Division of Corporations, Business, and Professional Licensing Joint Committee on Prescriptive Guidelines | Implementing SB 74 (2016) | Recommending Adoption of Washington's Interagency Guidelines on Prescribing Opioids for Pain | Recommends adoption of the State of Washington's Interagency Guidelines on Prescribing Opioids for Pain, but with one major change: reducing WA's 120 MME/day dosage threshold to a 90 MME/day dosage threshold. |
| Alaska | 2016 | Alaska State Medical Board | n/a | Policies and Procedures, Prescribing Controlled Substances | Updated a previously existing guideline to include the CDC guideline as an available tool for risk mitigation. |
| Arizona | 2016 | Chapter 211 | SB 1283 | Controlled Substances Prescription Monitoring Program | Requires PDMP check, at least once per quarter, prior to issuing an opioid analgesic or benzodiazepine listed in Schedule II, III, or IV. Creates exceptions. Promotes PDMP/EHR integration. Requires report from AZ Board of Pharmacy re: the usability, efficiency, and clinical use of the PDMP. |
| Arizona | 2016 | Governor, Declaration of Emergency | n/a | Opioid Overdose Epidemic | Directs the Director of the Arizona Department of Health Services to initiate emergency rulemaking with the Arizona Attorney General's Office in order to develop rules for opioid prescribing and treatment within health care institutions, to develop guidelines to educate healthcare providers on responsible prescribing practices; and other related items. |
| Arkansas | 2016 | Arkansas Medical Board | n/a | Regulation No. 2 | Includes within the definition of “Malpractice”: The prescribing of excessive amounts of controlled substances to a patient including the writing of an excessive number of prescriptions for an addicting or potentially harmful drug to a patient. “Excessive” is defined as the writing of any prescription in any amount without a detailed medical justification for the prescription documented in the patient record. For chronic pain, even with a documented justification, “excessive” means anything above 50 MME/day of opioids unless certain requirements are met related to diagnosis, documentation, PDMP checks, objective findings, and more. For acute pain, “excessive” means any prescription written for more than 7 days. |
| Arkansas | 2016 | Arkansas Medical Board | n/a | Regulation No. 19, Pain Management Programs | Establishes requirements for physicians operating pain management programs. Sets rules related to written treatment plans, coordinated care, education and qualifications for physicians managing Chronic Pain Management Programs, PDMP checks, etc. |
| Arkansas | 2016 | Arkansas Medicaid | n/a | n/a | Arkansas Medicaid has adopted the CDC Guidelines for Prescribing Opioids for Chronic Pain in their Fee-for-Service program. Further, updates were made related to opioid quantity limits and opioid clinical criteria. (According to a survey administered by the Henry J Kaiser Family Foundation to the State Medicaid Programs) |
| California | 2016 | Chapter 708 | SB 482 | Controlled Substances: CURES Database | Require a health care practitioner authorized to prescribe, order, administer, or furnish a controlled substance to consult the CURES database to review a patient’s controlled substance history no earlier than 24 hours, or the previous business day, before prescribing a Schedule II, Schedule III, or Schedule IV controlled substance to the patient for the first time and at least once every 4 months thereafter if the substance remains part of the treatment of the patient. Contains exemptions. |
| Colorado | 2016 | Colorado Revised Statutes, 12-36-106 | SB 158 | Physician Duties Delegated To Physician Assistant | Each prescription for a controlled substance issued by a physician assistant shall be imprinted with the name of the physician assistant's supervising physician. For all other prescriptions issued by a physician assistant, the name and address of the health facility and, if the health facility is a multi-specialty organization, the name and address of the specialty clinic within the health facility where the physician assistant is practicing must be imprinted on the prescription. |
| Colorado | 2016 | Health First Colorado (Medicaid) | n/a | n/a | Colorado Medicaid made updates to their fee-for-service program related to prior authorization for opioids, opioid step therapy requirements, and opioid clinical criteria for FY 2016. (According to a survey administered by the Henry J Kaiser Family Foundation to the State Medicaid Programs) |
| Connecticut | 2016 | Public Act No. 16-43 | HB 5053 | An Act Concerning Opioids and Access to Overdose Reversal Drugs | Amends the definition of “Practice of alcohol and drug counseling” to include SUD screening, risk stratification, treatment and referral options for patients taking drugs for pain. Limits opioid prescriptions to seven days for new patient in the outpatient setting. Limits opioid prescriptions for minors to seven-day supplies. Creates exceptions based on professional medical judgment. Changes PDMP reporting requirements from “24 hours” to “next business day.” Requires PDMP checks at least annually for Schedule V medications. Allows for delegates to check the PDMP on behalf of the prescribing practitioner. |
| Connecticut | 2016 | Special Act No. 16-3 | HB 5534 | An Act Concerning a Committee on the Practice of Naturopathy | Creates a committee to consider (1) the education and examination requirements and other qualifications necessary to allow persons licensed to practice naturopathy to prescribe, dispense and administer prescription drugs consistent with their scope of practice, and (2) the development of a naturopathic formulary of prescription drugs for persons licensed to practice naturopathy who meet specified educational and examination requirements or other qualifications to prescribe, dispense or administer. |
| Delaware | 2016 | Delaware Code, Title 16, Chapter 47 | HB 239 | An Act to Amend Title 16 of the Delaware Code Relating to the Distribution or Delivery of a Controlled Substance Causing Death (Brock Cerklefskie's Law) | A person is guilty of drug dealing resulting in death when the person delivers a Schedule I or II controlled substance in Tier 1 or greater quantity to another person in violation of this chapter, and said controlled substance thereafter causes the death of another person who uses or consumes it. It is not a defense to a prosecution under this section that the defendant did not directly deliver the controlled substance to the decedent. |
| Delaware | 2016 | Delaware Code, Title 16, Chapter 47 | SB 8 | An Act To Amend Title 16 Of The Delaware Code Relating To Uniform Controlled Substances | Senate Bill 119, passed during 2015's 147th General Assembly, inadvertently omitted the exception for veterinarians and methadone clinics (in addition to pharmacies) from dispensing more than 72 hours of a controlled substance. This bill corrected that error. |
| Delaware | 2016 | Delaware Code, Title 24, Chapter 21 | SB 143 | An Act To Amend Title 24 Of The Delaware Code Relating To Profession And Occupation Of Optometry | Allows optometrists to prescribe controlled substances, but with a limitation of a 72-hour supply for Schedule II controlled substances containing hydrocodone and for all Schedule III, IV, and V controlled substances. Requires optometrists to register with the Drug Enforcement Agency. Requires optometrists to provide proof of graduate level coursework that includes general and ocular pharmacology. |
| Delaware | 2016 | Delaware Code, Title 16, Subchapter VIII | SB 174 | An Act To Amend Titles 16 And 29 Of The Delaware Code With Respect To Drug Overdose Fatalities | Established a Commission to investigate and review the facts and circumstances of all overdose deaths involving opiates, fentanyl or heroin which occur in Delaware. The Commission shall make recommendations to the Governor and General Assembly, at least annually, regarding those practices or conditions which impact the frequency of overdose deaths involving opiates, fentanyl or heroin, and steps that can be taken to reduce the frequency of such overdose deaths. |
| Delaware (DE) | 2016 | DE Health and Social Services, Medicaid and Medical Assistance | n/a | n/a | Delaware Medicaid made updates to their Fee-for-Service program in 2016 related to opioid clinical criteria. (According to a 2016 survey administered by the Henry J Kaiser Family Foundation to the State Medicaid Programs) |
| District of Columbia | 2016 | District of Columbia Municipal Regulations | n/a | Chapter 103, Prescription Drug Monitoring Program | Establishes the District of Columbia Prescription Drug Monitoring Program. Outlines reporting requirements, covered substances, standards and formats for reporting, prescriber and dispenser access to PDMP data, disclosure of data to law enforcement and regulatory agencies, interstate data sharing, the PDMP Advisory Committee, etc. |
| Florida | 2016 | Chapter No. 2016-224 | HB 423 | Access to Health Care Services | Allows advanced practice nurse practitioners to prescribe, dispense, administer, or order controlled substances under certain circumstances. Establishes a committee to recommend a formulary of controlled substances that an advanced registered nurse practitioner may not prescribe or may prescribe only for specific uses or in limited quantities. Mandates continuing education on safe and effective prescription of controlled substances. Adds physicians who are board-eligible or board-certified with the American Board of Interventional Pain Physicians and the American Association of Physician Specialties to the list of those who are exempted from referring their patients with signs of substance use disorder to a specialist. |
| Florida | 2016 | Chapter No. 2016-231 | HB 977 | Behavioral Health Workforce | Makes technical changes to existing laws related to pain to improve clarity. Adds physicians who are board-eligible or board-certified with the American Board of Interventional Pain Physicians and the American Association of Physician Specialties to the list of those who are exempted from referring their patients with signs of substance use disorder to a specialist. |
| Florida | 2016 | Chapter No. 2016-145 | HB 1241 | Ordering of Medication | Makes technical changes to existing laws related to prescription requirements. Allows practitioners who supervise licensed physician assistants or advanced registered nurse practitioners to authorize those practitioners to order controlled substances under certain circumstances. |
| Florida | 2016 | Chapter No. 2016-112 | SB 422 | Health Insurance Coverage for Opioids | Provides that a health insurance policy that covers abuse-deterrent opioid analgesic drug products may impose a prior authorization requirement for an abuse-deterrent opioid analgesic drug product only if the insurer imposes the same requirement for each opioid analgesic drug product without an abuse-deterrence labeling claim. Prohibits such health insurance policy from requiring use of an opioid analgesic drug product without an abuse-deterrence labeling claim before authorizing the use of an abuse-deterrent opioid analgesic drug product. |
| Florida | 2016 | Chapter No. 2016-177 | SB 964 | Prescription Drug Monitoring Program | Exempts rehabilitative hospitals, assisted living facilities, and nursing homes from the reporting requirements of the PDMP. Allows designees of prescribers and dispensers to access the PDMP. |
| Georgia | 2016 | Act 354 | HB 900 | Crimes and offenses; electronic data base of prescription information; authorize the retention of data base information for 2 years; provisions | Authorizes the retention of prescription monitoring program information for two years. Provides for delegates of prescribers and dispensers to access PDMP data. Revises language relating to subpoenas and search warrants for PDMP data. Provides for accessing PDMP data for purposes of investigation of potential abuse. Allows for the release of de-identified PDMP data for instructional, drug abuse prevention, and research purposes. |
| Georgia | 2016 | Georgia Medicaid | n/a | n/a | Georgia Medicaid made updates related to opioid quantity limits, opioid clinical criteria, and opioid step therapy requirements in their Fee-for-Service program in 2016. (According to a survey administered by the Henry J Kaiser Family Foundation to the State Medicaid Programs) |
| Hawaii | 2016 | Act 183 | SB 2672 | Relating to Advanced Practice Registered Nurses | Amends various statutes to clarify the role of advanced practice registered nurses with regards to their authority and participation in the health care system, including granting APRNs the authority to prescribe controlled substances. |
| Hawaii | 2016 | Act 92 | SB 2861 | Relating to the Joint Formulary Advisory Committee | Eliminates the Joint Formulary Advisory Committee, and instead allows the Board of Nursing to solely determine the exclusionary formulary for qualified advanced practice registered nurses (APRNs) with prescriptive authority. |
| Hawaii | 2016 | Act 218 | SB 2915 | Relating to the Uniform Controlled Substances Act | Prohibits all Schedule II narcotic controlled substances from being prescribed or dispensed for more than a 30-day supply. Mandates that as a part of the controlled substance registration process, all practitioners and pharmacies shall be registered to utilize the electronic prescription accountability system. Expands the class of persons to whom PDMP data may be disclosed. |
| Idaho | 2016 | Session Law Chapter 72 | HB 337 | Relating to Prescriptions | Amends existing law to provide that medical examiners or coroners may access information in the prescriptions database. |
| Idaho | 2016 | Session Law Chapter 82 | HB 374 | Relating to the Controlled Substances Prescription Database | Authorizes certain supervised individuals (delegates) to access the prescription monitoring program database. Limits the number of delegates to be supervised. Requires Board of Pharmacy registration by each delegate. |
| Idaho | 2016 | Idaho Department of Health and Welfare (Medicaid) | n/a | n/a | Idaho Medicaid has adopted the CDC Guidelines for Prescribing Opioids for Chronic Pain in their Fee-for-Service program. Further, updates were made to opioid quantity limits, prior authorization for opioids, and opioid clinical criteria. (According to a survey administered by the Henry J Kaiser Family Foundation to the State Medicaid Programs) |
| Illinois | 2016 | Illinois Department of Healthcare and Family Services (Medicaid) | n/a | Fentanyl products non-preferred in Illinois Medicaid | As a result of safety concerns, effective August 15, 2016, fentanyl transdermal patches will require prior approval for all fee-for-service HFS participants. Long-acting opioid therapy options on the Preferred Drug List are extended-release morphine oral tablets and Embeda capsules. |
| Illinois | 2016 | Illinois Department of Healthcare and Family Services (Medicaid) | n/a | Methadone Prescribed for Pain | Due to safety concerns, HFS is removing methadone products for the treatment of pain from the Illinois HFS Preferred Drug List (PDL) effective April 5, 2016. |
| Illinois | 2016 | Illinois Department of Healthcare and Family Services (Medicaid) | n/a | n/a | Illinois Medicaid updated requirements related to prior authorization for opioids in their Fee-for-Service program. (According to a survey administered by the Henry J Kaiser Family Foundation to the State Medicaid Programs) |
| Indiana | 2016 | Public Law 82 | HB 1278 | An Act to amend the Indiana Code Concerning Professions and Occupations | Allows prescribers to include an INSPECT (PDMP) report in a patient's medical file. Allows a patient to access any PDMP report in their medical file. Allows coroners and prescriber delegates to access the PDMP. Requires boards that regulate health care providers that prescribe or dispense prescription drugs to establish by December 1, 2016, prescribing norms and dispensing guidelines that, if exceeded, justify the unsolicited dissemination of exception reports. |
| Indiana | 2016 | Public Law 31 | SB 174 | An Act to amend the Indiana Code Concerning Criminal Law and Procedure | Creates the offense of dealing in a controlled substance by a practitioner and enhances the offense if the offense causes the death of another person. |
| Indiana | 2016 | Public Law 37 | SB 214 | An Act to amend the Indiana Code Concerning Human Services | Prohibits Medicaid reimbursement for Subutex, Suboxone, or a similar trade name or generic of the drug if the drug was prescribed for the treatment of pain or pain management and the drug is only indicated for addiction treatment. |
| Indiana | 2016 | Medical Licensing Board of Indiana | n/a | 844 IAC 5-6-3 Triggers for imposition of requirements; exemptions | Establishes requirements concerning the use of opioids for chronic pain management for patients, with exemptions. Under certain circumstances, disallows: more than 60 opioid-containing pills/month for more than three consecutive months; a morphine equivalent dose of more than 15 MME/day for more than three consecutive months; a transdermal opioid patch for more than three consecutive months; tramadol in excess of 60 MME/day for more than three months; or, an extended release opioid that is not in an abuse-deterrent form for which there is an FDA-approved abuse deterrent form available. |
| Indiana | 2016 | Medical Licensing Board of Indiana | n/a | 844 IAC 5-6-5 Physician discussion with patient; treatment agreement | Requires the physician to discuss with the patient the risks and benefits of opioid treatment for chronic pain, as well as expectations related to prescription requests and proper medication use. |
| Indiana | 2016 | Medical Licensing Board of Indiana | n/a | 844 IAC 5-6-8 Drug monitoring testing | Establishes rules related to drug testing while treating a patient with opioids. |
| Indiana | 2016 | Indiana Medicaid | n/a | n/a | Indiana Medicaid updated requirements related to opioid quantity limits, prior authorization for opioids, opioid clinical criteria, and opioid step therapy requirements in their Fee-for-Service program. (According to a survey administered by the Henry J Kaiser Family Foundation to the State Medicaid Programs) |
| Iowa | 2016 | Chapter 1052 | SF 2102 | Drug Prescribing and Dispensing - Information Program - Access | Directs the Board of Pharmacy to implement improvements to facilitate secure access to the prescription monitoring program through electronic health and pharmacy information systems. The board is authorized to provide PDMP information to an institutional user to facilitate secure access by prescribing practitioners or pharmacists to program information through electronic health and pharmacy information systems. Authorizes the release of PDMP information for statistical, public research, public policy, or educational purposes, if all the personal identifying information is first removed. |
| Iowa | 2016 | Iowa Admin. Code § 653-13.2 (2016) | n/a | Standards of practice -- appropriate pain management. | This rule establishes standards of practice for the management of acute and chronic pain. Encourages the use of non-opioid therapies. Clarifies that the undertreatment of pain is a departure from the acceptable standard of practice in Iowa. Requires documentation related to the treatment of acute and chronic pain. Urges use of a thorough patient evaluation, a comprehensive treatment plan, documented informed consent, periodic review, consideration of consultation or referral, written pain management treatment agreements, use of urine drug testing, and use of the prescription monitoring program. |
| Iowa | 2016 | Iowa Medicaid | n/a | n/a | Iowa Medicaid began requiring use of the prescription monitoring program in their Fee-for-Service program in 2016. Updates were also made to opioid quantity limits, prior authorization for opioids, opioid step therapy requirements, and opioid clinical criteria. (According to a survey administered by the Henry J Kaiser Family Foundation to the State Medicaid Programs) |
| Kansas | 2016 | Kansas Boards of Healing Arts, Nursing, and Pharmacy | n/a | Joint Policy Statement from Kansas Boards of Healing Arts, Nursing and Pharmacy on Use of Controlled Substances for Treatment of Chronic Pain | Makes recommendations regarding assessment of the patient, treatment plan, informed consent and treatment agreement, periodic review, consultation, documentation in the medical record, and compliance with controlled substances laws and regulations. |
| Kentucky | 2016 | Department of Medicaid Services | n/a | n/a | Kentucky Medicaid made updates related to opioid quantity limits, prior authorization for opioids, opioid step therapy requirements, and opioid clinical criteria in their Fee-for-Service program in 2016. Use of the PDMP was required. (According to a survey administered by the Henry J Kaiser Family Foundation to the State Medicaid Programs) |
| Louisiana | 2016 | HCR 113 | HCR 113 | A Concurrent Resolution | To establish the Louisiana Commission on Preventing Opioid Abuse to study and make recommendations regarding both short-term and long-term measures that can be taken to tackle prescription opioid and heroin abuse and addiction in Louisiana, by using the best practices and evidence-based strategies for its prevention, treatment, and enforcement. |
| Louisiana | 2016 | Act No. 189 | SB 56 | Relative to the State Prescription Monitoring Program | Directs the Board to establish standards, by rulemaking, for the retention, archiving, and destruction of prescription monitoring information. |
| Louisiana | 2016 | Louisiana Department of Health (Medicaid) | n/a | n/a | Louisiana Medicaid began requiring use of the prescription monitoring program in their Fee-for-Service program in 2016. Updates were also made to opioid quantity limits and opioid clinical criteria. (According to a survey administered by the Henry J Kaiser Family Foundation to the State Medicaid Programs) |
| Maine | 2016 | SP 671 | LD 1646 | An Act To Prevent Opiate Abuse by Strengthening the Controlled Substances Prescription Monitoring Program | Requires prescribers to check the PDMP upon an initial prescription for an opioid or benzodiazepine and again every 90 days. Requires dispensers to check the PDMP prior to dispensing opioids or benzodiazepines, and the dispenser shall notify the program and withhold a prescription until the dispenser is able to reach the prescriber if the dispenser has reason to believe the prescription is fraudulent or duplicative. Requires prescribers of opioids to complete a training course on the prescription of opioid pain medication that has been approved by the Department of Health and Human Services. Prohibits opioid prescriptions in excess of 100 morphine milligram equivalents per day to any one patient. Prohibits opioid prescriptions of more than 15 days at a time when treating chronic pain. Prohibits opioid prescriptions of more than 3 days when treating acute pain. Requires all opioid prescriptions to be transmitted electronically. Creates fines for prescribers and dispensers who knowingly violate these sections. |
| Maryland | 2016 | Chapter 147 | HB 437 | Department of Health and Mental Hygiene - Prescription Drug Monitoring Program - Modifications | Requires providers who prescribe controlled dangerous substances listed in Schedule II through Schedule V to register with the Prescription Drug Monitoring Program before obtaining a new or renewal registration. Authorizes prescriber and pharmacist delegates to access the PDMP. Authorizes the publication of a list of monitored prescription drugs that have a low potential for abuse by individuals. Requires dispensers to submit information to the PDMP once every 24 hours. Requires prescribers and pharmacists to complete a course of instruction and training developed by the department regarding the effective use of the PDMP. Requires prescribers to request at least 4 months of PDMP data prior to initiating a course of treatment that includes opioids or benzodiazepines, and then again every 90 days. Requires that prescribers document their use of the PDMP in the patient medical record. Exempts prescribers from checking the PDMP if the prescription is (1) for 3 days or less, (2) for the treatment of cancer-related pain in the inpatient setting, (3) for a patient with a terminal illness, (4) for patients in assisted living or long-term care, or (5) for acute pain for no more than 14 days related to surgery, fractures, significant trauma, or childbirth. Creates additional exemptions. |
| Maryland | 2016 | Chapter 116 | HB 752 | Physicians - Prescriptions Written by Physician Assistants or Nurse Practitioners - Preparing and Dispensing | Providing that specified provisions of law do not prohibit a licensed physician who complies with specified requirements from personally preparing and dispensing a prescription written by a physician assistant in accordance with a specified delegation agreement or a nurse practitioner who is authorized to practice under a specified provision of law and is working with the physician in the same office setting. |
| Maryland | 2016 | Chapter 700 | SB 806 | State Board of Physicians - Naturopathic Doctors - Establishment of Naturopathic Doctors Formulary Council and Naturopathic Formulary | Establishes a Naturopathic Doctors Formulary Council within the State Board of Physicians. Requires the Council to develop formulary recommendations for the Board. The Board will then adopt a specified formulary. Specifies that “naturopathic medicine” includes prescribing, dispensing, or administering nonprescription and prescription drugs, but specifically prohibits the naturopathic formulary from including controlled substances. |
| Maryland | 2016 | Lawrence J. Hogan, Jr., Governor | Executive Order 01.01.2017.01 | Inter-Agency Heroin and Opioid Coordinating Council | Establishes the Opioid Operational Command Center. The Center shall develop operational strategies to continue implementing the recommendations of the Heroin and Opioid Emergency Task Force. |
| Massachusetts | 2016 | Chapter 46 | H 3650 | An Act making appropriations for the fiscal year 2016 | Section 191 provides for an examination of the prescribing and treatment history, including court ordered treatment or treatment within the criminal justice system, of persons in the commonwealth who suffered fatal opiate overdoses in calendar year 2014, and directs the creation of a report in an aggregate and de-identified form on trends discovered through the examination. |
| Massachusetts | 2016 | Chapter 52 | HB 4056 | An Act Relative to Substance Use, Treatment, Education, and Prevention | A registered pharmacist filling a prescription for an opioid substance in schedule II may dispense the prescribed substance in a lesser quantity than the recommended full quantity indicated on the prescription if requested by the patient. The remaining quantity in excess of the quantity requested by the patient shall be void. Practitioners who prescribe controlled substances, except veterinarians, shall be required, as a prerequisite to obtaining or renewing their professional licenses, to complete appropriate training relative to: (i) effective pain management; (ii) the risks of abuse and addiction associated with opioid medication; (iii) identification of patients at risk for substance use disorders; (iv) counseling patients about the side effects, addictive nature and proper storage and disposal of prescription medications; (v) appropriate prescription quantities for prescription medications that have an increased risk of abuse; and (vi) opioid antagonists, overdose prevention treatments and instances in which a patient may be advised on both the use of and ways to access opioid antagonists and overdose prevention treatments. The boards of registration for each professional license that requires this training shall develop the standards for appropriate training programs. Establishes rules related to prescriptions for extended-release long-acting opioids. Allows patients to file voluntary non-opiate directives. When issuing a prescription for an opiate to an adult patient for outpatient use for the first time, a practitioner shall not issue a prescription for more than a 7-day supply. A practitioner shall not issue an opiate prescription to a minor for more than a 7-day supply at any time and shall discuss with the parent or guardian of the minor the risks associated with opiate use and the reasons why the prescription is necessary. Requires PDMP use. |
| Massachusetts | 2016 | Department of Industrial Accidents | n/a | Opioid/Controlled Substance Protocol | This Protocol is intended to: Promote the delivery of safe, quality health care to injured workers; Ensure patient pain relief and functional improvement; Be used in conjunction with other treatment guidelines, not in lieu of other recommended treatment; Prevent and reduce the number of complications caused by prescription medication, including addiction; and Recommend opioid prescribing practices that promote functional restoration. Requires, in part, risk assessment, PDMP checks, urine drug testing, treatment agreement, starting with the lowest possible effective dose, documentation in the medical record, informed consent, review of job requirements and guidance regarding safely performing those duties while medicated. Disallows initiating treatment of acute pain with long acting or extended release opioids. Initial prescriptions for opioids are limited to no more than 7 days. Adopts CDC dosage recommendations. States that patients should not be abandoned, but rather, need to be tapered off of opioid medications (at pain resolution, lack of functional improvement, etc.). |
| Massachusetts | 2016 | MassHealth (Medicaid) | n/a | n/a | MassHealth has adopted the CDC Guidelines for Prescribing Opioids for Chronic Pain in their Fee-for-Service program. Further, they adopted the guideline as a requirement for Managed Care Organizations to adopt. They also updated their requirements related to prior authorization for opioids. (According to a survey administered by the Henry J Kaiser Family Foundation to the State Medicaid Programs) |
| Michigan | 2016 | Public Act No. 499 | HB 5400 | Health occupations; advanced practice registered nurses; licensure of advanced practice registered nurses (APRNs); provide for and provide other general amendments. | Establishes parameters under which APRN's may prescribe controlled substances. |
| Michigan | 2016 | Public Act No. 379 | HB 5533 | Health occupations; physician's assistants; regulation and oversight of physician's assistants; modify. | Establishes parameters under which physician assistants may prescribe controlled substances. |
| Michigan | 2016 | Michigan Medicaid | n/a | n/a | Michigan Medicaid updated the opioid quantity limits, prior authorization requirements for opioids, opioid clinical criteria, and opioid step therapy requirements in their Fee-for-Service program in 2016. (According to a 2016 survey administered by the Henry J Kaiser Family Foundation to the State Medicaid Programs) |
| Minnesota | 2016 | Chapter 124 | SF 1425 | An act relating to health; adding provisions to the definition of the “practice of pharmacy”; making changes concerning the collection and disposal of legend drugs as pharmaceutical waste; etc. | Allows pharmacies to collect legend drugs from patients for the purpose of disposing the legend drug as pharmaceutical waste. Special rules apply to the collection of controlled substances. |
| Minnesota | 2016 | Chapter 185 | SF 1440 | An act relating to health; making changes to the Minnesota prescription monitoring program; etc. | Sets time frames regarding the retention and disposal of de-identified PDMP information. Expands the class of persons/entities who may access the PDMP. Requires all prescribers licensed to prescribe controlled substances within the state to register and maintain a user account with the PDMP. |
| Minnesota | 2016 | Minnesota Statutes |  | 256B.0638 Opioid prescribing improvement program; annual report to legislature | By September 15, 2016, and annually thereafter, the commissioner of human services shall report to the legislature on the implementation of the opioid prescribing improvement program in the Minnesota health care programs. The report must include data on the utilization of opioids within the Minnesota health care programs. |
| Minnesota | 2016 | Minnesota Medicaid | n/a | n/a | Minnesota Medicaid updated the opioid quantity limits in their Fee-for-Service program in 2016. (According to a 2016 survey administered by the Henry J Kaiser Family Foundation to the State Medicaid Programs) |
| Mississippi | 2016 | Mississippi Division of Medicaid | n/a | n/a | Mississippi Medicaid updated the opioid clinical criteria in their Fee-for-Service program in 2016. (According to a 2016 survey administered by the Henry J Kaiser Family Foundation to the State Medicaid Programs) |
| Montana | 2016 | Montana Medicaid | n/a | n/a | Montana Medicaid updated their opioid quantity limits, prior authorization requirements for opioids, opioid clinical criteria, and opioid step therapy requirements in their Fee-for-Service program in 2016. (According to a 2016 survey administered by the Henry J Kaiser Family Foundation to the State Medicaid Programs) |
| Nebraska | 2016 | Section 71-2454, Section 84-712.05 | LB 471 | Change prescription drug monitoring provisions and create the Veterinary Prescription Monitoring Program Task Force | Requires all dispensed prescriptions of controlled substances to be reported to the PDMP daily. Allows dispensers and prescribers to authorize designees for purposes of submitting information to, or accessing, the PDMP. |
| Nebraska | 2016 | Nebraska Department of Health and Human Services (Medicaid) | n/a | n/a | Nebraska Medicaid has adopted the CDC Guideline for Prescribing Opioids for Chronic Pain in their Fee-for-Service program. (According to a survey administered by the Henry J Kaiser Family Foundation to the State Medicaid Programs) |
| Nevada | 2016 | Division of Health Care Financing and Policy (Medicaid) | n/a | Medicaid Services Manual | Opioids are subject to prior authorization, step therapy, clinical criteria, and quantity limits. Opioids are only covered without prior authorization for initial prescriptions of 7 days or less, for a total of 13 7-day prescriptions in any rolling 12-month period, and for prescriptions for less than 60 MME/day. To exceed the quantity limits, the patient must have chronic pain that cannot be controlled through use of non-opioids, the lowest effective dose must be used, and a pain contract must be on file. Exceptions to the limits exist for cancer-related pain, post-surgical pain, palliative and long-term care, those with HIV/AIDS, and prescriptions written by or in consultation with a pain specialist. |
| New Hampshire | 2016 | Chapter 221 | HB 1210 | Relative to prescriptions for controlled drugs by telemedicine and relative to rulemaking authority and enforcement concerning prices for filling certain prescriptions. | Clarifies when it is appropriate for practitioners to adjust or prescribe controlled drugs to patients by telemedicine. |
| New Hampshire | 2016 | Chapter 213 | HB 1423 | Relative to rulemaking for prescribing controlled drugs. | Requires board of medicine, board of dental examiners, board of nursing, board of registration in optometry, board of podiatry, naturopathic board of examiners, and board of veterinary medicine to adopt rules for prescribing controlled drugs. Contains mandatory standards for such rules, such as mandatory risk assessments, establishment of treatment plans, PDMP checks, informed consent, and requiring the lowest effective dosage for the fewest number of days. |
| New Hampshire | 2016 | Chapter 329 | SB 522 | Making an appropriation to the office of professional licensure and certification for technology upgrades for the controlled drug prescription health and safety program and relative to the forfeiture of property. | Appropriates $130,000 for the purposes of technology upgrades for the controlled drug prescription health and safety program (PDMP). |
| New Hampshire | 2016 | Chapter 309 | SB 523 | Relative to the controlled drug prescription health and safety program and establishing a commission to study requiring controlled drugs and controlled drug analogs to be provided in abuse-deterrent formulation. | Adds naturopaths to the definition of practitioner for the purposes of the controlled drug prescription health and safety program (PDMP). Establishes a commission to study requiring controlled drugs and controlled drug analogs to be provided in abuse-deterrent formulation. |
| New Hampshire | 2016 | Chapter 330 | SB 533 | Relative to the governor's commission on alcohol and drug abuse prevention, treatment, and recovery and making supplemental appropriations to the commission, the New Hampshire housing finance authority, and the department of health and human services, bureau of drug and alcohol services. | Makes changes in the membership, organization, duties, meetings, and reports of the governor's commission on alcohol and drug abuse prevention, treatment, and recovery, and establishes that the commission serves in an advisory capacity to both the governor and the general court. Makes supplemental appropriations to the commission, the New Hampshire housing finance authority, and the department of health and human services. Authorizes the department of justice to accept gifts, grants, and donations for the purpose of funding an assistant attorney general dedicated to prosecuting drug cases. |
| New Hampshire | 2016 | Chapter 2 | SB 576 | Relative to the penalty for possession and use of fentanyl-class drugs, insurance coverage for substance use disorders, the funding of the controlled drug prescription health and safety program, the membership of the board of medicine, and prescribers of controlled drugs. | Adds possession and use of fentanyl-class drugs for the purposes of the penalty under the controlled drug act. Clarifies the funding of the controlled drug prescription health and safety program (PDMP). Clarifies access to the PDMP. Requires prescribers of controlled drugs to query the PDMP prior to prescribing controlled substances and to take 3 hours of continuing education or an online examination. Adds 2 physician members to the medical review subcommittee. |
| New Hampshire | 2016 | Board of Medicine | Implementing HB 1423 | Med 502 Opioid Prescribing | Rules regarding acute pain, chronic pain, lowest effective dose for limited duration, documentation, informed consent, safe disposal, compliance with rules, risk assessment, opioid limits, consultation with a pain specialist, urine drug testing, treatment agreements, PDMP, etc. |
| New Hampshire | 2016 | Board of Nursing | Implementing HB 1423 | Nur 502 Opioid Prescribing | Rules for nurses regarding acute pain, chronic pain, lowest effective dose for limited duration, documentation, informed consent, safe disposal, compliance with rules, risk assessment, opioid limits, consultation with a pain specialist, urine drug testing, treatment agreements, PDMP, etc. |
| New Hampshire | 2016 | NH Medicaid | n/a | n/a | New Hampshire Medicaid began requiring of the prescription monitoring program in their Fee-for-Service program in 2016. (According to a 2016 survey administered by the Henry J Kaiser Family Foundation to the State Medicaid Programs) |
| New Hampshire | 2016 | NH Rev Stat § 318-B:39 (2016) |  | Prescribers Required to Query the Program Prior to Prescribing Controlled Substances. | Prescribers shall query the PDMP for a patient's initial prescription when prescribing schedule II, III, and IV opioids for the management or treatment of pain and then periodically and at least twice per year, with exceptions. |
| New Jersey | 2016 | Chapter 8 | S 2156 | Requires prescribers to discuss addiction risk associated with certain drugs prior to issuing prescription to minor patient. | Requires prescribers to discuss addiction risk associated with Schedule II controlled substances prior to issuing prescription to minor patient. Requires the documentation of this discussion in the patient's medical record. |
| New Jersey | 2016 | New Jersey Medicaid | n/a | n/a | New Jersey Medicaid updated opioid quantity limits, prior authorization requirements for opioids, and opioid clinical criteria in their Fee-for-Service program in 2016. (According to a 2016 survey administered by the Henry J Kaiser Family Foundation to the State Medicaid Programs) |
| New Mexico | 2016 | Chapter 46 | SB 263 | Opioid Prescription Monitoring | Requires practitioners to obtain and review PDMP reports prior to prescribing or dispensing an opioid for the first time to a patient, and then again every three months. Requires the practitioner to document the receipt and review of the PDMP report in the patient's medical record. |
| New Mexico | 2016 | Governor's Prescription Drug Misuse and Overdose Prevention and Pain Management Advisory Council | Implementing revisions to the Pain Relief Act | 2016 Recommendations | Practitioners should avoid prescribing opioid pain medications and benzodiazepines concurrently whenever possible. Practitioners should adhere to the summary of the Centers for Disease Control and Prevention Guideline for Prescribing Opioids for Chronic Pain (CDC Guideline), published in the New England Journal of Medicine, and the complete CDC Guideline, in addition to the one-page summary document. Providers should not use the Guideline to override a provider’s judgement regarding a specific patient, but rather to guide skillful and appropriate pain management. The medical provider licensing boards should not use the CDC Guideline to set strict policy or to enforce practice standards. Licensing entities should promulgate rules requiring practitioners to limit an initial opioid prescription for acute pain to no more than a 10-day supply for a single prescription. |
| New York | 2016 | Chapter 71 | A 10727 / SB 8139 | Pain Management Drugs: Subscriber Training | Requires prescribers of pain medications to undergo three hours of continuing education every three years on pain management and palliative care. Restricts to seven days an initial opioid prescription for acute pain, and it limits the copay if additional medication is needed for the same underlying issue. Pharmacists also must provide educational materials to consumers upon dispensing of a controlled substance. |
| New York | 2016 | Chapter 66 | SB 6516 | To amend the public health law, in relation to reporting of opioid overdose data; and providing for the repeal of certain provisions upon expiration thereof | Requires all statewide overdose information, not just fatal overdose data, to be included in the Department of Health's (DOH) report that will be posted annually on DOH's website no later than the first day of October. The report's information will identify by each of the state's regions where the dispensing of opioid antagonists is occurring in order to better identify the areas that are experiencing high rates of overdoses. |
| New York | 2016 | Chapter 167 | SB 8106 | To amend the public health law, in relation to including a Lyme disease and tick-borne infection awareness and prevention program within the health care and wellness education and outreach program. | Adds a Lyme and tick-borne disease awareness and prevention initiative to the state's Health Care and Wellness Education Program. |
| New York | 2016 | N.Y. Pub. Health § 3331(5) (2016) | n/a | Scheduled substances administering and dispensing by practitioners | Disallows prescribing or dispensing Schedule II - V controlled substances to “addicts” or “habitual users”, unless an exception applies. Establishes rules for the labeling of controlled substances. No more than a 30 day supply or, pursuant to regulations of the commissioner enumerating conditions warranting specified greater supplies, no more than a three month supply of a schedule II, III or IV substance, as determined by the directed dosage and frequency of dosage, may be dispensed by an authorized practitioner at one time. A practitioner may not prescribe more than a seven-day supply of any schedule II, III, or IV opioid to an ultimate user upon the initial consultation or treatment of such user for acute pain.  Upon any subsequent consultations for the same pain, the practitioner may issue any appropriate renewal, refill, or new prescription for the opioid or any other drug. |
| New York | 2016 | Department of Health (Medicaid) | n/a | n/a | Effective July 22, 2016, initial opioid prescribing for acute pain is limited to a seven (7) day supply per New York State Public Health Law Section 3331 (see above). The Department of Health will communicate a date in the near future when this will be systematically enforced by the Medicaid Fee-for-Service Program. The following procedure is being put in place until such time that the Department is able to implement an automated solution to exempt copayments for such subsequent opioid prescriptions. Procedure: If a prescriber initiates a subsequent prescription for the same pain medication within 30 days of the initial 7-day supply, and the pharmacist is notified and/or confirms this upon reviewing the patient’s prescription history or utilizing ProDUR editing, the following may be used to exempt the copayment for the subsequent prescription: In NCPDP field 461-EU, enter a value “04” (Exempt Copay and/or Coinsurance). Although pharmacists should continue to use all of the tools at their disposal when dispensing opioid prescriptions, pharmacists are not required to verify with the prescriber whether an opioid prescription written for greater than a 7-day supply is in accordance with the above-referenced statutory requirements. Pharmacists may continue to dispense opioids as prescribed, consistent with current laws, regulations, and Medicaid policies. |
| New York | 2016 | Department of Health (Medicaid) | n/a | n/a | New York Medicaid has adopted the CDC Guideline for Prescribing Opioids for Chronic Pain in their Fee-for-Service program. Further, they adopted the guideline as a requirement for Managed Care Organizations to adopt. (According to a survey administered by the Henry J Kaiser Family Foundation to the State Medicaid Programs) |
| North Carolina | 2016 | NC Medicaid and Health Choice | n/a | n/a | North Carolina Medicaid updated opioid step therapy requirements in their Fee-for-Service program in 2016. (According to a 2016 survey administered by the Henry J Kaiser Family Foundation to the State Medicaid Programs) |
| North Dakota | 2016 | North Dakota Medicaid | n/a | n/a | North Dakota Medicaid updated opioid quantity limits, prior authorization for opioids, opioid clinical criteria, opioid step therapy requirements, and requirements related to required use of the prescription monitoring program in their Fee-for-Service program in 2016. (According to a 2016 survey administered by the Henry J Kaiser Family Foundation to the State Medicaid Programs) |
| Ohio | 2016 | HCR 16 | HCR 16 | Urges revision of patient pain management survey | To encourage the federal Centers for Medicare and Medicaid Services to revise survey measures included in the Hospital Consumer Assessment of Healthcare Providers and Systems that relate to patient pain management. |
| Ohio | 2016 | Governor's Cabinet Opiate Action Team (GCOAT) and the workgroup on Opioids and Other Controlled Substances. | n/a | Ohio Guideline for the Management of Acute Pain Outside of Emergency Departments | This guideline provides a general approach to the outpatient management of acute pain. It is not intended to take the place of clinician judgement. Discusses assessment and diagnosis of pain, development of a treatment plan, use of non-pharmacologics and non-opioids, different types of pain, opioid pharmacologic treatment, pain reevaluation, etc. |
| Oklahoma | 2016 | SoonerCare (Oklahoma Medicaid) | n/a | n/a | Oklahoma Medicaid updated opioid quantity limits, prior authorization requirements for opioids, opioid step therapy requirements, and required use of the prescription monitoring program in their Fee-for-Service program in 2016. (According to a 2016 survey administered by the Henry J Kaiser Family Foundation to the State Medicaid Programs) |
| Oregon | 2016 | Chapter 100 | HB 4124 | Relating to prescription drugs; and declaring an emergency. | Requires Oregon Health Authority to disclose prescription monitoring information to practitioner or pharmacist or member of practitioner's or pharmacist's staff for use in certain health information technology systems. |
| Oregon | 2016 | Health Evidence Review Commission, Oregon Health Authority (Medicaid) | n/a | State of Oregon Evidence-based Clinical Guidelines Project: Evaluation and Management of Low Back Pain | Retired on January 14, 2016, this was a clinical practice guideline based on the Joint Practice Guideline of the American College of Physicians and the American Pain Society. Contained recommendations related to patient evaluation, routine imaging, imaging for suspected conditions, advanced imaging, pharmacologic therapy (including opioids and non-opioids), and non-pharmacologic therapy. |
| Oregon | 2016 | Health Evidence Review Commission, Oregon Health Authority (Medicaid) | n/a | Opioid Prescribing for Conditions of the Back and Spine | Strictly limits opioids for all on Medicaid. For acute pain (first 6 weeks), opioid treatment is only available when the prescription is 7 days or less, for short-acting opioids only, when one or more non-opioids have been tried and found ineffective or contraindicated, and when prescribed with a plan to keep active and with consideration of additional non-pharmacological therapies. There can be no documented history or opioid misuse or abuse. For pain after 6 weeks and up to 90 days, treatment with opioids requires: documented evidence of improved function of at least 30% compared to baseline; co-prescription of non-pharmacological treatments (acupuncture, physical therapy, etc.); and, each prescription is for no more than 7 days and for short-acting opioids only. After 90 days, opioids may be considered ONLY when there is a significant change in status, such as a clinically significant verifiable new injury or surgery. For patients with chronic pain from diagnoses on these lines currently treated with long term opioid therapy, opioids must be tapered off, with a taper of about 10% per week recommended. By the end of 2016, all patients currently treated with long term opioid therapy must be tapered off of long-term opioids for diagnoses on these lines. Updates were made regarding the required use of the prescription monitoring program. |
| Pennsylvania | 2016 | Act 122 | HB 1699 | Safe Emergency Prescribing Act | A health care practitioner may not prescribe an opioid drug product to an individual seeking treatment in an emergency department or urgent care center, or who is in observation status in a hospital, in a quantity sufficient to treat that individual for more than seven days. If, in the professional medical judgment of a health care practitioner, more than a seven-day supply of an opioid drug product is required to treat a patient's acute medical condition or is necessary for the treatment of pain associated with a cancer diagnosis or for palliative care, then the health care practitioner may issue a prescription for the quantity needed to treat such acute medical condition or pain associated with a cancer diagnosis or for palliative care. The condition triggering prescription of the opioid drug product under this paragraph shall be documented in the patient's medical record, and the health care practitioner must indicate that a non-opioid drug product alternative was not appropriate to treat the medical condition. A health care practitioner in an emergency department or urgent care center, or who is caring for a patient in observation status, may not write a prescription refill for an opioid drug product. Requires referral to treatment under certain circumstances. Requires the prescribing health care practitioner to query the PDMP, but this does not apply to any medication provided to a patient in the course of treatment while undergoing care in an emergency department. |
| Pennsylvania | 2016 | Act 124 | SB 1202 | Achieving Better Care By Monitoring All Prescriptions Program (ABC-MAP) Act - Omnibus Amendments | A dispenser shall query the PDMP before dispensing an opioid drug product or a benzodiazepine prescribed to a patient if: the patient is a new patient of the dispenser; the patient pays cash when they have insurance; the patient requests a refill early; or, the patient is getting opioid drug products or benzodiazepines from more than one prescriber. A new patient does not include an individual going to the same pharmacy, or a different physical location of that pharmacy, if the patient's record is available to the dispenser. A prescriber shall check the PDMP each time a patient is prescribed an opioid drug product or benzodiazepine by the prescriber. Requires prescribers and dispensers to complete at least two hours of education in pain management or identification of addiction and at least two hours of education in the practices of prescribing or dispensing of opioids. |
| Pennsylvania | 2016 | Act 125 | SB 1367 | Prescribing Opioids to Minors | Establishes strict rules regarding opioid prescriptions to minors. Contains a 7-day limit with exceptions, informed consent mandates, documentation in the medical record, parental consent rules, etc. |
| Pennsylvania | 2016 | Act 126 | SB 1368 | Safe Opioid Prescription | Implements a Patient Voluntary Nonopioid Directive. Further Beginning August 1, 2017, the licensing boards shall, by joint regulation, implement a safe prescription of a controlled substance containing an opioid curriculum. The curriculum may be offered in colleges or by providers approved by the licensing boards and shall include all of the following: (1) Current, age-appropriate information relating to pain management, (2) Multimodal treatments for chronic pain that minimize the use of a controlled substance containing an opioid, (3) If a controlled substance containing an opioid is indicated, instruction on safe methods of prescribing a controlled substance containing an opioid that follow guideline-based care, (4) Identification of patients who have risk factors for developing problems with prescription of a controlled substance containing an opioid, (5) Training on managing substance use disorders as a chronic disease. |
| Pennsylvania | 2016 | Department of Health | n/a | Geriatric Pain, Opioid Use and Safe Prescribing | Guidelines related to opioid use in geriatric patients, covering subjects such as: avoiding use of long-acting opioids in older adults, situations in which low-dose opioids may be indicated, informed consent, treatment plans, opioids' effect on cognitive function, use of daily pill box organizers, initiating lower doses than typically used in adult populations, use of pain specialists for high dosages, etc. |
| Pennsylvania | 2016 | Department of Health | n/a | Opioid Dispensing Guidelines | Guidelines related to dispensing opioids, covering topics such as: appropriate monitoring for safety and efficacy; weaning schedules, coordination of care, recognizing opioid equivalencies, verifying the legitimacy of the patient, provider, and prescription, drug interactions, safe dosages, patient education, communication with prescribers, etc. |
| Pennsylvania | 2016 | Pennsylvania Medical Assistance (Medicaid) | n/a | n/a | Pennsylvania Medicaid made updates to opioid quantity limits, prior authorization for opioids, and opioid clinical criteria in their Fee-for-Service program in 2016. (According to a 2016 survey administered by the Henry J Kaiser Family Foundation to the State Medicaid Programs) |
| Rhode Island | 2016 | Chapter 194 | H 7847 | Uniformed Controlled Substance Act | Authorizes any vendor, agent, contractor, or designee who operates an electronic medical health record (EMR) or clinical management system to have access to the prescription drug monitoring program (PDMP). |
| Rhode Island | 2016 | Chapter 199 | H 8224 | Uniform Controlled Substances Act--regulation Of Manufacturing, Distributing, Prescribing, Administering, And Dispensing Controlled Substances | Requires pharmacies to transmit prescription information to the PDMP within 24 hours of dispensing an opioid. Provides limits on amounts of opioids to be prescribed, allowing no more than 30 MME/day for a maximum of 20 total doses for acute pain. Directs the Director of Health to develop regulations for appropriate training in best prescribing practices needed for license renewal. Makes registration with the PDMP a condition of license renewal. The PDMP shall be reviewed by prescribers or their designees prior to initiating opioid therapy, and then at least every three months. |
| Rhode Island | 2016 | Chapter 200 | H 8326 | Uniform Controlled Substances Act | Improves the usefulness and value of the prescription drug monitoring database program by adding analytical functions, requiring program updates at least weekly, and incorporating data from similar programs in other states. |
| Rhode Island | 2016 | Chapter 180 | S 2823 | Uniform Controlled Substances Act--regulation Of Manufacturing, Distributing, Prescribing, Administering, And Dispensing Controlled Substances | Requires pharmacies to transmit prescription information to the PDMP within 24 hours of dispensing an opioid. Provides limits on amounts of opioids to be prescribed, allowing no more than 30 MME/day for a maximum of 20 total doses for acute pain. Directs the Director of Health to develop regulations for appropriate training in best prescribing practices needed for license renewal. Makes registration with the PDMP a condition of license renewal. The PDMP shall be reviewed by prescribers or their designees prior to initiating opioid therapy, and then at least every three months. |
| Rhode Island | 2016 | Chapter 464 | S 2897 | Uniformed Controlled Substance Act | Authorizes any vendor, agent, contractor, or designee who operates an electronic medical health record (EMR) or clinical management system to have access to the prescription drug monitoring program (PDMP). |
| Rhode Island | 2016 | Chapter 351 | S 2946 | Uniform Controlled Substances Act | Improves the usefulness and value of the prescription drug monitoring database program by adding analytical functions, requiring program updates at least weekly, and incorporating data from similar programs in other states. |
| Rhode Island | 2016 | Rhode Island Medicaid | n/a | n/a | Rhode Island Medicaid made updates to opioid quantity limits and opioid clinical criteria in their Fee-for-Service program in 2016. (According to a 2016 survey administered by the Henry J Kaiser Family Foundation to the State Medicaid Programs) |
| South Carolina | 2016 | South Carolina Healthy Connections Medicaid | n/a | n/a | South Carolina Medicaid began requiring use of the prescription monitoring program in their Fee-for-Service program in 2016. (According to a 2016 survey administered by the Henry J Kaiser Family Foundation to the State Medicaid Programs) |
| Tennessee | 2016 | Pub. Ch. 656 | HB 1768 | Relative to Dispensing of Prescription Medication | Allows pharmacists to exercise professional judgment to dispense varying quantities of medication per fill up to the total number of dosage units prescribed, but expressly states that this section does not apply to controlled substances or any medications for which a report to the PDMP is required. |
| Tennessee | 2016 | Pub. Ch. 1033 | SB 1466 | Hospitals and Health Care Facilities - As enacted, imposes licensure and other requirements on pain management clinics. - Amends TCA Title 63 and Title 68. | Amends existing requirements for the operation of a pain management clinic, including adding a licensure requirement and a requirement that a pain management clinic obtain a certificate of need. |
| Tennessee | 2016 | Pub. Ch. 546 | SB 1513 | Relative to the Controlled Substance Database Advisory Committee | Requires representatives of the Controlled Substance Database Advisory Committee to appear before legislative committees to update them on the committee's findings. |
| Tennessee | 2016 | Pub. Ch. 959 | SB 1850 | Relative to Review of Prescribers Association with Overdoses of Prescription Opiates | Authorizes the commissioner of health to obtain records maintained by any healthcare facility in order to facilitate investigations and inquiries concerning opioid drug abuse, opioid drug overdoses, and opioid overdose deaths. |
| Tennessee | 2016 | Pub. Ch. 829 | SB 2057 | Relative to Qualifications for a Pain Management Specialist | Specifies that, on and after July 1, 2016, a new applicant may only qualify as a pain management specialist through board certification by the American board of interventional pain physicians (ABIPP) by passing parts 1 and 2 of its examination, and holding an unencumbered Tennessee license, and maintaining the minimum number of CME hours in pain management to satisfy retention of ABIPP diplomate status. |
| Tennessee | 2016 | Pub. Ch. 973 | SB 2060 | Relative to Dispensing Opioids or Benzodiazepines | Sets requirements that prescribers must meet in order to dispense opioids or benzodiazepines. |
| Tennessee | 2016 | Pub. Ch. 1002 | SB 2552 | Tennessee Prescription Safety Act of 2016 | Deletes and replaces pre-existing provisions related to the controlled substance database committee. Directs the committee to examine PDMP data to identify unusual patterns of prescribing and dispensing and refer those practitioners to the chief board of pharmacy investigator. Establishes new PDMP reporting requirements. Requires all prescribers and dispensers of controlled substances to register with the PDMP. Establishes the persons and entities that may access PDMP data. |
| Tennessee | 2016 | TennCare (Tennessee Medicaid) | n/a | n/a | TennCare made updates related to opioid quantity limits, prior authorization for opioids, opioid clinical criteria, opioid step therapy requirements, and required use of the prescription monitoring program in their Fee-for-Service program in 2016. (According to a 2016 survey administered by the Henry J Kaiser Family Foundation to the State Medicaid Programs) |
| Texas | 2016 | Texas Medical Board | n/a | §170.3 Minimum Requirements for the Treatment of Chronic Pain | Revised pain management rules related to: evaluation of the patient; documentation; treatment plans; informed consent; treatment agreements; urine drug testing; limitations on who may prescribe to patients being treated for pain; limitation of only one pharmacy for a patient being treated for pain; discontinuation/tapering; consultation and referral; etc. |
| Texas | 2016 | Texas Medical Board | n/a | §195.2 Certification of Pain Management Clinics | Makes updates to the rules pertaining to Certification of Pain Management Clinics. |
| Texas | 2016 | Texas State Board of Pharmacy | n/a | §315 Controlled Substances | Amends the Controlled Substances chapter relating to: definitions; official prescription forms; pharmacy responsibility; electronic reporting; emergency prescriptions; modification of prescriptions; Out-of-State prescribers; release of prescription data; Schedule III-V prescription forms; access requirements; etc. |
| Texas | 2016 | Texas Medicaid | n/a | n/a | Texas Medicaid updated opioid quantity limits in their Fee-for-Service program in 2016. (According to a 2016 survey administered by the Henry J Kaiser Family Foundation to the State Medicaid Programs) |
| Utah | 2016 | Session Law Chapter 99 | HB 114 | Controlled Substance Reporting | Amends the requirement for a general acute hospital to report to the Division of Occupational and Professional Licensing admissions for poisoning or overdose involving a prescribed controlled substance. Requires courts to report to the division certain violations of the Utah Controlled Substances Act. Amends the purposes of the division's controlled substance database. Requires the division to enter into the database information it receives in reports by hospitals concerning persons admitted for poisoning involving a prescribed controlled substance. Requires the division to enter into the database information it receives in reports by courts concerning persons convicted for driving under the influence of a prescribed controlled substance. |
| Utah | 2016 | Session Law Chapter 104 | HB 149 | Regarding Controlled Substances | Requires the medical examiner to provide a report to the Division of Occupational and Professional Licensing (DOPL) when the medical examiner determines that a death resulted from poisoning or overdose involving a prescribed controlled substance. Requires that, when DOPL receives a report described in the preceding paragraph, DOPL shall notify each practitioner who may have written a prescription for the controlled substance involved in the poisoning or overdose. Allows probation and parole officers to obtain information in the controlled substance database without a warrant. Allows the division to provide information to law enforcement officers engaged in specified types of investigations. |
| Utah | 2016 | Session Law Chapter 197 | HB 150 | Controlled Substance Prescription Notification | Amends the Controlled Substance Database Act to allow a person for whom a controlled substance is prescribed to designate a third party who is to be notified when a controlled substance prescription is dispensed to the person. Allows the person to direct the division to discontinue providing the information. Requires that the division advise the person that if the person discontinues the notification, the third party will be advised of the discontinuance. Requires that the division comply with the direction and also notify the third party of the discontinuation. Authorizes the division to make administrative rules to facilitate implementation of this provision. |
| Utah | 2016 | Session Law Chapter 112 | HB 239 | Access to Opioid Prescription Information via Practitioner Data Management Systems | Requires the Division of Occupational and Professional Licensing within the Department of Commerce to make opioid prescription data information in its controlled substance database accessible to an opioid prescriber or pharmacist via the prescriber's or pharmacist's electronic data system. Limits access to and use of the information by an electronic data system, a prescriber, or a pharmacist in accordance with rules established by the division. Requires rulemaking by the division. Requires the division to periodically audit use of the information. Amends Controlled Substance Database Act penalty provisions. |
| Utah | 2016 | Session Law Chapter 275 | HB 375 | Prescription Drug Abuse Amendments | Mandates that a prescriber or dispenser of an opioid for individual outpatient usage shall access and review the PDMP as necessary in the prescriber's or dispenser's professional judgment. If the dispenser's access and review suggest that the individual seeking an opioid may be obtaining opioids in quantities or frequencies inconsistent with generally recognized standards, the dispenser shall reasonably attempt to contact the prescriber to obtain the prescriber's informed, current, and professional decision regarding whether the prescribed opioid is medically justified, notwithstanding the results of the PDMP search. |
| Utah | 2016 | Session Law Chapter 127 | SB 58 | Nurse Practitioner Amendments | Allows an advanced practice registered nurse to prescribe a Schedule II controlled substance without a consultation and referral plan under certain circumstances. Requirements include 2 years or 2,000 hours of experience, ongoing PDMP checks, and adherence to appropriate guidelines. |
| Utah | 2016 | Session Law Chapter 005 | SB 3001 (Special Session 3) | Controlled Substance Database Modifications | Describes the circumstances under which probation and parole officers may access information from the controlled substance database without a warrant. |
| Utah | 2016 | Division of Occupational and Professional Licensing | Implementing HB 239 (2016) | 58-37f-303. Access to opioid prescription information via an electronic data system. | Clarifies who may be a user of the PDMP. Sets forth rules regarding the availability of PDMP data and electronic data systems. Specifies that the Division shall make rules specifying: (i) an electronic data system's: (A) allowable access to and use of opioid prescription information in the database; and, (B) minimum actions that must be taken to ensure that opioid prescription information accessed from the database is protected from inappropriate disclosure or use; and, (ii) an EDS user's: (A) allowable access to opioid prescription information in the database via an electronic data system; and, (B) allowable use of the information. |
| Vermont | 2016 | Act 173 | S 243 | An Act relating to Combating Opioid Abuse in Vermont | This act adds the appropriate prescription of controlled substances to treat acute pain to the topics on which professional licensing authorities must develop evidence-based standards and requires the licensing authorities to submit their standards to the Commissioner of Health to review the PDMP and increases the frequency with which dispensers must report to the PDMP from at least once a week to daily. The act creates the 35-member Controlled Substances and Pain Management Advisory Council as the successor to the Unified Pain Management System Advisory Council and other advisory groups. It directs the Commissioner of Health to adopt rules on prescribing opioids after consulting with the Council, which may include number and time limits on pills prescribed, including a maximum number of pills to be prescribed following minor medical procedures. Requires health care professionals who have a federal Drug Enforcement Agency number or who dispense controlled substances to complete a total of at least two hours of continuing education for each licensing period on topics related to preventing opioid abuse, misuse, and diversion. Requires the Commissioner of Health to convene medical educators to develop curricular materials to ensure that students in medical education programs learn safe prescribing practices and screening, prevention, and intervention for cases of prescription drug misuse and abuse and directs the Department of Health to establish a community grant program to support local opioid prevention strategies. The act increases a fee imposed on pharmaceutical manufacturers whose drugs are paid for by DVHA from 0.5 percent to 1.5 percent of annual DVHA drug spending and adds to the permissible uses of the Evidence-Based Education and Advertising Fund. The act requires the Department of Health to establish and maintain a statewide unused prescription drug disposal program and directs BlueCross BlueShield of Vermont to evaluate the evidence supporting the use of acupuncture to treat pain and whether its plans should provide coverage for acupuncture services. It also creates a pilot project to offer acupuncture services to Medicaid-eligible Vermonters with a diagnosis of chronic pain. |
| Vermont | 2016 | Vermont Medicaid | n/a | n/a | Vermont Medicaid has adopted the CDC Guideline for Prescribing Opioids for Chronic Pain in their Fee-for-Service program. (According to a survey administered by the Henry J Kaiser Family Foundation to the State Medicaid Programs) |
| Virginia | 2016 | Chapter 406 | HB 293 / SB 513 | Prescription Monitoring Program; Requirements of Prescribers of Opioids | Requires a prescriber to check the PDMP upon initiating a new course of treatment that includes opioids when that treatment is expected to last more than 14 days. Eliminates the requirement to check the PDMP when prescribing a benzodiazepine. Allows prescribers to have delegates access the PDMP on their behalf. |
| Virginia | 2016 | Chapter 86 | HB 498 | TPA-certified Optometrists; Prescription of Certain Schedule II Controlled Substances | Provides that a TPA-certified optometrist who is authorized to prescribe controlled substances may issue prescriptions for or provide manufacturer's samples of analgesics included on Schedule II consisting of hydrocodone in combination with acetaminophen to his patients. |
| Virginia | 2016 | Chapter 98 | HB 657 | Prescription Monitoring Program; indicators of misuse, disclosure of information. | Directs the Director of the Department of Health Professions to develop, in consultation with an advisory panel that shall include representatives of the Boards of Medicine and Pharmacy, criteria for indicators of unusual patterns of prescribing or dispensing of covered substances by prescribers or dispensers. Authorizes the Director to disclose information about the unusual prescribing or dispensing of a covered substance by an individual prescriber or dispenser to the Enforcement Division of the Department of Health Professions. |
| Virginia | 2016 | Chapter 447 | HB 829 | Prescribers of covered substances; continuing education. | Authorizes the Director of the Department of Health Professions to disclose information to the Board of Medicine about prescribers who meet a certain threshold for prescribing covered substances for the purpose of requiring relevant continuing education. Directs the Board of Medicine to require prescribers identified by the Director of the Department of Health Professions to complete two hours of continuing education in each biennium on topics related to pain management, the responsible prescribing of covered substances, and the diagnosis and management of addiction. |
| Virginia | 2016 | Chapter 410 | HB 1044 / S 491 | Prescription Monitoring Program; disclosure of certain information. | Provides that the Director of the Department of Health Professions may disclose information in the possession of the PDMP about a specific recipient who is a member of a Virginia Medicaid managed care program to a physician or pharmacist licensed in the Commonwealth and employed by the Virginia Medicaid managed care program to determine eligibility for and to manage the care of the specific recipient in a Patient Utilization Management Safety or similar program. Requires the PDMP advisory committee to provide guidance to the Director regarding such disclosures. |
| Virginia | 2016 | Chapter 309 | SB 287 | Prescription Monitoring Program; reports by dispensers shall be made within 24 hours or next day. | Reports by dispensers to the PDMP shall be made within 24 hours or the dispenser's next business day, whichever comes later. Outlines the persons and entities to whom the Director of the Department of Health Professions may disclose PDMP data. |
| Virginia | 2016 | Virginia Department of Medical Assistance Services (Medicaid) | n/a | n/a | Virginia Medicaid has adopted the CDC Guideline for Prescribing Opioids for Chronic Pain in their Fee-for-Service program. Updates were also made to opioid quantity limits, prior authorization for opioids, opioid clinical criteria, opioid step therapy requirements, and required use of the prescription monitoring program. (According to a survey administered by the Henry J Kaiser Family Foundation to the State Medicaid Programs) |
| Washington | 2016 | Chapter 104 | HB 2730 | Prescription Monitoring Program - Data Access Eligibility | Allows PDMP data to be provided to a health care facility or entity for the purpose of providing medical or pharmaceutical care to the patients of the facility, subject to certain requirements. |
| Washington | 2016 | Chapter 148 | SB 6203 | Practice of Pharmacy - Long-Term Care Settings | In part, makes amendments to the law relating to controlled substance prescriptions in long-term care settings. |
| Washington | 2016 | Executive Order | n/a | Addressing the Opioid Use Public Health Crisis | The state Agency Medical Directors Group (AMDG) shall work with the Bree Collaborative (a health care improvement partnership), Tribal governments, boards and commissions, professional associations, health care systems, insurers, teaching institutions, and others to consider amendments to the state pain guidelines and other training and policy materials, consistent with the 2015 AMDG and the 2016 CDC opioid guidelines, to reduce unnecessary prescribing for acute pain conditions for the general population, especially adolescents. (Includes other provisions related to substance use disorder, education of youth, morbidity and mortality data, etc.) |
| Washington | 2016 | Washington State Health Care Authority (Medicaid, Public Employees) | n/a | n/a | Washington Medicaid updated requirements related to the prior authorization of opioids in their Fee-for-Service program in 2016. (According to a 2016 survey administered by the Henry J Kaiser Family Foundation to the State Medicaid Programs) |
| West Virginia | 2016 | Chapter 134 | HB 4146 | Providing insurance cover abuse-deterrent opioid analgesic drugs | Provides for insurance coverage of abuse-deterrent opioid analgesic drugs. |
| West Virginia | 2016 | Chapter 175 | HB 4334 | Clarifying the requirements for a license to practice as an advanced practice registered nurse and expanding prescriptive authority | Directs the promulgation of governing the eligibility and extent to which an advanced practice registered nurse may prescribe drugs. Such rules shall provide, at a minimum, a state formulary classifying those categories of drugs which shall not be prescribed by advanced practice registered nurse including, but not limited to, Schedules I and II of the Uniform Controlled Substances Act, anti-neoplastics, radiopharmaceuticals and general anesthetics. Drugs listed under Schedule III shall be limited to a thirty-day supply without refill. |
| West Virginia | 2016 | Chapter 183 | HB 4428 | Clarifying that optometrists may continue to exercise the same prescriptive authority which they possessed prior to hydrocodone being reclassified | Optometrists may not use Schedule II controlled substances. However, an oral pharmaceutical certified licensee may prescribe hydrocodone and hydrocodone containing drugs for a duration of no more than three days. |
| West Virginia | 2016 | Chapter 201 | HB 4537 | Chronic Pain Clinic Licensing Act | Amends and reenacts the Chronic Pain Clinic Licensing Act, relating to the regulation of chronic pain clinics, updating definitions, deleting an exemption for affiliation with a medical school, and clarifying due process concerns regarding the process for hearing notices upon appeal. |
| West Virginia | 2016 | Chapter 149 | SB 195 | Authorizing DHHR to promulgate legislative rules | In relevant part, authorizes the Department of Health and Human Resources to promulgate a legislative rule regarding chronic pain management licensure which exempts terminal patients from portions of the rules. Further amends existing rules to require that a pain clinic shall not offer a bounty, monetary or equipment or merchandise reward, or free services for individuals in exchange for recruitment of new patients into the clinic. Further, a pain clinic shall not recruit new patients for the purpose of attempting to circumvent the licensure requirements of this rule. |
| West Virginia | 2016 | Office of the Attorney General, Consumer Protection and Antitrust Division | n/a | Best Practices for Prescribing Opioids in West Virginia | Guidelines/best practices intended for (1) utilizing West Virginia’s Controlled Substance Monitoring Program, (2) reducing risk of opioid misuse, (3) ensuring that the prescription medication, dose, and quantity is safe and appropriate, and (4) incorporating naloxone into opioid treatment discussions. |
| West Virginia | 2016 | West Virginia Medicaid | n/a | n/a | West Virginia Medicaid made updates to opioid quantity limits in their Fee-for-Service program in 2016. (According to a 2016 survey administered by the Henry J Kaiser Family Foundation to the State Medicaid Programs) |
| Wisconsin | 2016 | Act 266 | AB 364 | Reporting, disclosure, and practitioner review requirements under the prescription drug monitoring program; providing an exemption from emergency rule procedures; and granting rule-making authority. | Dispensers must report to the PDMP by the next business day. Specifies the persons to whom PDMP records may be disclosed, including to relevant law enforcement agencies. |
| Wisconsin | 2016 | Act 268 | AB 365 | Duty of law enforcement officers to report to the Prescription Drug Monitoring Program controlled-substance violations, opioid-related drug overdoses or deaths, and reports of stolen prescription drugs. | Requires law enforcement officers to report controlled substance violations, opioid-related drug overdoses or deaths, and reports of stolen prescription drugs to the PDMP. |
| Wisconsin | 2016 | Act 265 | AB 366 | Pain clinic certification and requirements, granting rule-making authority, and providing a penalty. | Defines “Pain Clinic” and sets requirements for the operation of such clinics. Adopts requirements related to medical directors, payment methods, direct dispensing, and multiple locations. |
| Wisconsin | 2016 | Act 262 | AB 367 | Reporting by treatment programs using methadone and requiring review of prescription drug monitoring database. | Adopts reporting requirements by treatment programs using methadone, including the program's plan for tapering individuals off methadone, staffing requirements, and more. |
| Wisconsin | 2016 | Act 269 | AB 660 | Guidelines for prescribing controlled substances and the examination authority of the Medical Examining Board. | Allows the medical examining board, the podiatry affiliated credentialing board, the board of nursing, the dentistry examining board, and the optometry board to issue guidelines regarding best practices in prescribing controlled substances. |
| Wisconsin | 2016 | Act 267 | AB 766 | Review and reporting requirements for the Prescription Drug Monitoring Program. | Requires the Board to conduct a review of the PDMP to evaluate the actual outcomes of the program compared with projected outcomes, including an evaluation of (1) the satisfaction with the program of pharmacists, pharmacies, practitioners, and other users, and (2) the program's impact on referrals of dispensers and prescribers to licensing boards for discipline and to law enforcement for investigation/prosecution. Requires a separate report regarding the trends and changes in use of monitored prescription drugs within the state; the number of participating practitioners; the number of individuals receiving prescription orders from 5 or more practitioners and/or pharmacies within any 90-day period; etc. |
| Wisconsin | 2016 | Chapter 961.385 | n/a | Prescription Drug Monitoring Program | The board shall conduct a quarterly review of the PDMP to evaluate the actual outcomes of the program compared with projected outcomes. The board's review shall include an evaluation of all of the following: (1) The satisfaction with the program of pharmacists, pharmacies, practitioners, and other users of the program; and, (2) The program's impact on referrals of pharmacists, pharmacies, and practitioners to licensing or regulatory boards for discipline and to law enforcement agencies for investigation and possible prosecution. The board shall provide a report to the department of safety and professional services that includes all of the following: (a) The results of the board's review under sub. (5). This paragraph does not apply after October 30, 2020; (b) An assessment of the trends and changes in the use of monitored prescription drugs in this state; (c) The number of practitioners, by profession, and pharmacies submitting records to the board under the program in the previous quarter; (d) A description of the number, frequency, and nature of submissions by law enforcement agencies under s. 961.37 (3) (a) in the previous quarter; (e) A description of the number, frequency, and nature of requests made in the previous quarter for disclosure of records generated under the program; (f) The number of individuals receiving prescription orders from 5 or more practitioners or having monitored prescription drugs dispensed by 5 or more pharmacies within the same 90-day period at any time over the course of the program; (g) The number of individuals receiving daily morphine milligram equivalents of 1 to 19 milligrams, 20 to 49 milligrams, 50 to 99 milligrams, and 100 or more milligrams in the previous quarter; and, (h) The number of individuals to whom both opioids and benzodiazepines were dispensed within the same 90-day period at any time over the course of the program. |
| Wyoming | 2016 | Wyoming Medicaid | n/a | n/a | Wyoming Medicaid made updates to opioid quantity limits in their Fee-for-Service program in 2016. (According to a 2016 survey administered by the Henry J Kaiser Family Foundation to the State Medicaid Programs) |
| United States | 2017 | Public Law No. 115-83 | HR 304 | Protecting Patient Access to Emergency Medications Act of 2017 | Amends the Controlled Substances Act to direct the Drug Enforcement Administration (DEA) to register an emergency medical services agency to administer controlled substances if their application demonstrates the appropriate qualifications. Allows EMS professionals to administer controlled substances in Schedules II - V outside the physical presence of a medical director if such administration is authorized under state law and pursuant to a standing or verbal order. |
| United States | 2017 | Public Law No. 115-91 | HR 2810 | National Defense Authorization Act for Fiscal Year 2018 | The Secretary of Defense shall conduct a study on the effectiveness of the training provided to military health care providers regarding opioid prescribing practices, initiatives in opioid safety, the use of the VA/DOD Clinical Practice Guideline for Management of Opioid Therapy for Chronic Pain, and other related training. |
| United States | 2017 | Department of Health and Human Services | n/a | Strategy to Combat Opioid Abuse, Misuse, and Overdose: A Framework Based on the Five Point Strategy | Improve access to prevention, treatment, and recovery support services to prevent the health, social, and economic consequences associated with opioid misuse and addiction, and to enable individuals to achieve long-term recovery. Strengthen public health data reporting and collection to improve the timeliness and specificity of data, and to inform a real-time public health response as the epidemic evolves. Advance the practice of pain management to enable access to high-quality, evidence-based pain care that reduces the burden of pain for individuals, families, and society while also reducing the inappropriate use of opioids and opioid-related harms. Target the availability and distribution of overdose-reversing medications to ensure the broad provision of these drugs to people likely to experience or respond to an overdose, with a particular focus on targeting high-risk populations. Support cutting-edge esearch that advances our understanding of pain, overdose and addiction, leads to the development of new treatments, and identifies effective public health interventions to reduce opioid-related health harms. |
| United States | 2017 | Department of Veterans Affairs, Department of Defense | n/a | VA/DoD Clinical Practice Guideline for Opioid Therapy for Chronic Pain | These guidelines "are not intended to define a standard of care and should not be construed as one. Neither should they be interpreted as prescribing an exclusive course of management." Makes recommendations regarding the initiation and continuation of opioids, risk mitigation strategies (including urine drug testing, checking the PDMP, overdose education, co-prescribing naloxone, etc.), informed consent, opioid dosages, opioid duration, and opioid tapers. There is also a section of opioid therapy for acute pain. |
| United States | 2017 | National Academies of Sciences, Engineering, and Medicine (NASEM), Committee on Pain Management and Regulatory Strategies to Address Prescription Opioid Abuse | n/a | Pain Management and the Opioid Epidemic: Balancing Societal and Individual Benefits and Risks of Prescription Opioid Use | This report is a result of the U.S. Food and Drug Administration (FDA) asking the National Academies of Sciences, Engineering, and Medicine to convene a committee to update the state of the science on pain research, care, and education and to identify actions the FDA and others can take to respond to the opioid epidemic. The resulting report states that a sustained, coordinated effort is necessary to stem the still-escalating prevalence of opioid-related harms, including a culture change in prescribing for chronic noncancer pain, aggressive regulation of opioids by the FDA, and multi-pronged policies by state and local governments. However, the committee also counsels against arbitrary restrictions on access to opioids by suffering patients whose health care providers have prescribed these drugs responsibly. Major points relate to: restricting the lawful supply of opioids, influencing prescribing practices (use of alternatives, use of PDMP), reducing demand, and reducing harm. |
| Alabama | 2017 | Alabama Medicaid | n/a | n/a | Began requiring use of the prescription monitoring program for opioids in their Fee-for-Service program in 2017. (According to a 2016 survey administered by the Henry J Kaiser Family Foundation to the State Medicaid Programs) |
| Alaska | 2017 | Chapter 2 SSSLA 17 | HB 159 | Opioids; Prescriptions; Database; Licenses | Disallows more than a seven-day supply of opioids for an initial prescription. States that is the intent of the legislature that the seven-day supply limit for an initial opioid prescription (for physicians, dentists, and advanced practice registered nurses) and the four-day supply limit (for optometrists) for an initial opioid prescription under this Act may not be considered as a minimum length of time appropriate for an initial prescription. Requires that prescribers receive not less than 2 hours of education in pain management and opioid use and addiction every two years. Makes it grounds for denial, suspension, of revocation of licensure for a person who prescribes or dispenses opioids in excess of the authorized maximum dosages. |
| Alaska | 2017 | Legislative Resolve 12 | SCR 101 | Suspend Uniform Rules For HB 159 (2017) | Suspends Rules 24(c), 35, 41(b), and 42(e), Uniform Rules of the Alaska State Legislature, in consideration of House Bill No. 159 (2017). |
| Alaska | 2017 | Alaska's Prescription Drug Monitoring Program | Implementing HB 159 (2017) | Controlled Substance Legislative Update – August 2017 | Implements the provisions of HB 159 (2017). |
| Alaska | 2017 | Alaska Opioid Policy Task Force | n/a | Alaska Opioid Policy Task Force Final Recommendations | The areas the Task Force addresses include but are not limited to: Prescribing practices related to pain management and opioid medications; Insurance and Medicaid roles in preventing and managing opioid addiction; Public education and destigmatization; Any potential collateral consequences of policies considered by the task force; etc. |
| Alaska | 2017 | Alaska Department of Health and Social Services, Division of Public Assistance (Medicaid) | n/a | n/a | Alaska Medicaid expressed that they planned to adopt the CDC Guideline for Prescribing Opioids for Chronic Pain in their Fee-for-Service program in 2017. Furthermore, updates were made to opioid quantity limits, prior authorization for opioids, opioid clinical criteria, and opioid step therapy requirements. (According to a 2016 survey administered by the Henry J Kaiser Family Foundation to the State Medicaid Programs) |
| Arizona | 2017 | Arizona Department of Health Services | n/a | Opioid Prescribing and Treatment 23 A.A.R. 2203 | Requires licensed heath care institutions to: (1) Establish, document, and implement policies and procedures for prescribing, ordering, or administering opioids as part of treatment; (2) Include specific processes related to opioids in a health care institution’s quality management program; and (3) Notify the Department of the death of a patient from an opioid overdose. The Department also specified requirements with which an individual will need to comply before prescribing opioids, ordering opioids, or administering opioids in the treatment of a patient. To reduce the burden on licensed health care institutions, the Department exempted the prescription, ordering, or administration of opioids as part of treatment for a patient with a terminal condition. |
| Arkansas | 2017 | Act 72 | HB 1024 | To Modify the Definition of "Chronic Nonmalignant Pain" in the Combatting Prescription Drug Abuse Act | In part, defines "chronic nonmalignant pain" to mean pain requiring more than three consecutive months of prescriptions for an average dose of tramadol equivalent to 200 mg or greater per day. |
| Arkansas | 2017 | Act 46 | HB 1025 | To Amend the Prescription Drug Monitoring Program Act to Allow Access to the Arkansas Medicaid Prescription Drug Program | Allows PDMP access to the Arkansas Medicaid Prescription Drug Program (the Program), which includes any entity contracted with the Program and to which the Program has granted authority. The Program shall provide to the department administering the PDMP at least monthly a list of all Medicaid beneficiaries in order for the Program to be granted access to monitor prescription misuse and abuse among Medicaid beneficiaries. |
| Arkansas | 2017 | Act 820 | SB 339 | To Amend the Prescription Drug Monitoring Program to Mandate Prescribers Check the Prescription Drug Monitoring Program When Prescribing Certain Medications | Provider shall check PDMP when prescribing (1) an opioid from Schedule II or III, every time the prescription is issued; and (2) a benzodiazepine medication, for the first time it is prescribed to the patient. Contains exemptions. Oncologists shall check the PDMP when prescribing to a patient on an initial malignant episodic diagnosis and every three months thereafter. |
| Arkansas | 2017 | Act 688 | SB 420 | To Allow Insurance Carriers to Obtain Practitioner and Dispenser Information Maintained by the Prescription Drug Monitoring Program; and to Allow Prescriber Data to be Used for Research Purposes | The department may provide information in the PDMP to insurance carriers for the purpose of verifying prescriber or dispenser registration for individuals that are part of the health plan’s network of providers. |
| Arkansas | 2017 | Arkansas Medical Board | n/a | Regulation 17: Continuing Medical Education | Requires physicians and physician assistants to obtain at least one hour of CME each year regarding the prescribing of opioid and benzodiazepines. |
| Arkansas | 2017 | Arkansas Medical Board | n/a | Regulation 41: Prescription Drug Monitoring Program | Provider shall check PDMP when prescribing (1) an opioid from Schedule II or III, every time the prescription is issued; and (2) a benzodiazepine medication, for the first time it is prescribed to the patient. Contains exemptions. Oncologists shall check the PDMP upon the initial prescription and then once every three (3) months. The PDMP check must be documented in the medical record. Adopts the Voluntary Nonopioid Directive Act. |
| Arkansas | 2017 | Arkansas Medicaid | n/a | n/a | Arkansas Medicaid expressed that they planned to update their Fee-for-Service program in 2017 related to opioid quantity limits, prior authorization for opioids, and opioid clinical criteria. (According to a 2016 survey administered by the Henry J Kaiser Family Foundation to the State Medicaid Programs) |
| California | 2017 | Chapter 607 | AB 40 | CURES database: health information technology system | Requires the Department of Justice to make the electronic history of controlled substances dispensed to an individual under a health care practitioner’s or pharmacist’s care, based on data contained in the CURES database, available to the practitioner or pharmacist. Requires an entity operating a health information technology system that is requesting to establish an integration with the CURES database to pay a reasonable system maintenance fee. Prohibits the department from accessing patient-identifiable information in an entity’s health information technology system. |
| California | 2017 | Chapter 611 | AB 265 | Prescription drugs: prohibition on price discount. | Prohibits, except as provided, a person who manufactures a prescription drug from offering in California any discount, rebate, product voucher, or other reduction in an individual’s out-of-pocket expenses, including, but not limited to, a copayment or deductible, for any prescription drug if a lower cost brand name or non-brand name prescription drug is available that is designated by the United States Food and Drug Administration as therapeutically equivalent to, or interchangeable with, the prescription drug manufactured by that person. |
| California | 2017 | Chapter 615 | AB 1048 | Health care: pain management and Schedule II drug prescriptions. | A health facility shall not in any way condition or base executive compensation on patient satisfaction measurements for pain management. Removes the requirement that pain be assessed at the same time as vital signs. Establishes rules for the partial fill of Schedule II drugs. |
| Colorado | 2017 |  | SB 146 | Access To Prescription Drug Monitoring Program | Allows a health care provider who has authority to prescribe controlled substances, or the provider's designee, to query the program regarding a current patient, regardless of whether the provider is prescribing or considering prescribing a controlled substance to that patient. Specifies that, in addition to accessing the program when dispensing or considering dispensing a controlled substance, a pharmacist or designee of the pharmacist may access the program regarding a current patient to whom the pharmacist is dispensing or considering dispensing a prescription drug. |
| Colorado | 2017 | Health First Colorado (Medicaid), Department of Health Care Policy and Financing | n/a | Opioid Policy Change FAQs for Providers | The maximum daily quantity of short-acting opioids is 8 dosage forms per day (56 pills for a 7 day supply) for opioid naïve patients. All long-acting opioids will require a prior authorization for opioid naïve patients. |
| Colorado | 2017 | Health First Colorado (Medicaid) | n/a | n/a | Colorado Medicaid made updates to their fee-for-service program related to prior authorization for opioids, opioid step therapy requirements, and opioid clinical criteria for FY 2017. (According to a survey administered by the Henry J Kaiser Family Foundation to the State Medicaid Programs) |
| Connecticut | 2017 | Public Act No. 17-188 | HB 7049 | An Act Concerning the Legislative Commissioners' Recommendations for Technical Changes to the Public Health Statutes | Makes only technical changes to existing law related to opioid limits. |
| Connecticut | 2017 | Public Act No. 17-131 | HB 7052 | An Act Preventing Prescription Opioid Diversion and Abuse | Requires electronic prescriptions for controlled substances. Establishes law related to Voluntary Nonopioid Directive Forms. Requires a discussion of risks when issuing an opioid prescription. |
| Connecticut | 2017 | Husky Health (Medicaid) | n/a | n/a | Connecticut Medicaid expressed that they planned to adopt the CDC Guideline for Prescribing Opioids for Chronic Pain in their Fee-for-Service program in 2017. Further, updates were made related to opioid quantity limits, prior authorization for opioids, and required use of the prescription monitoring program. (According to a 2016 survey administered by the Henry J Kaiser Family Foundation to the State Medicaid Programs) |
| Delaware | 2017 | Volume Chapter 81:27 | HB 91 | An Act to Amend Title 16 of the Delaware Code Relating to Controlled Substances | Establishes a PDMP Advisory Committee to provide input, advice, and guidance to the Office of Controlled Substances regarding the maintenance of the PDMP. Mandates that if there is reasonable cause to believe a breach of professional standards may have occurred, the PDMP Advisory Committee shall notify the professional licensure, certification, or regulatory agency or entity and shall provide prescription information required for an investigation. In determining whether reasonable cause exists, the Office of Controlled Substances shall regularly examine PDMP data and promptly seek the direct input of the PDMP Advisory Committee with respect to any cases that meet objective thresholds set by the PDMP Advisory Committee. |
| Delaware | 2017 | Volume Chapter 81:126 | HB 220 | An Act to Amend Title 16 of the Delaware Code Relating to Drug Abuse. | This act establishes the Addiction Action Committee as a means to establish a comprehensive, coordinated strategy to address addiction in Delaware. The committee will recommend and encourage comprehensive prevention, treatment, surveillance and monitoring strategies to evaluate and curtail the addiction epidemic in Delaware and shall promote quality and accessible pain management for Delawareans. |
| Delaware | 2017 | Volume Chapter 81:98 | SB 44 | An Act to Amend Title 16 of the Delaware Code Relating to the Uniform Controlled Substances Act | This Bill clarifies that every prescriber holding a controlled substance registration must be registered with the Prescription Monitoring Program. Further, prescribers who receive a controlled substances registration for the first time must register with the Prescription Monitoring Program within 90 days. |
| Delaware | 2017 | Department of State, Division of Professional Regulation | n/a | 9.0 Safe Prescribing of Opioid Analgesics | Adopts opioid limits for initial and subsequent prescriptions. Sets requirements related to informed consent, PDMP, UDT screens, documentation, etc. |
| Delaware | 2017 | Delaware Health and Social Services, Division of Public Health | n/a | Delaware Prescription Opioid Guidelines for Health Care Providers | Suggests: use of non-opioid alternatives; evaluating patients for substance use disorder risk; use of an opioid risk tool. Reiterates regulations which limit prescriptions for acute pain to no more than 7 days, require PDMP checks and informed consent, and require documentation in the medical record. Lists the basic elements of mandatory written treatment agreements. |
| Delaware | 2017 | Delaware Health and Social Services, Medicaid & Medical Assistance | n/a | n/a | Delaware Medicaid began requiring use of the prescription monitoring program for their Fee-for-Service program in 2017. Further, updates were made related to opioid quantity limits and opioid clinical criteria. (According to a 2016 survey administered by the Henry J Kaiser Family Foundation to the State Medicaid Programs) |
| District of Columbia | 2017 | DC Medicaid | n/a | n/a | DC Medicaid expressed that they planned to adopt the CDC Guideline for Prescribing Opioids for Chronic Pain in their Fee-for-Service program in 2017. Further, they planned to require that Managed Care Organizations adopt the guideline. They also implemented new opioid quantity limits and made updates to prior authorization for opioids, opioid clinical criteria, and opioid step therapy. (According to a 2016 survey administered by the Henry J Kaiser Family Foundation to the State Medicaid Programs) |
| Florida | 2017 | Chapter No. 2017-169 | HB 557 | Controlled Substance Prescribing | Existing law required dispensation to be reported to the PDMP within 7 days. This bill changed that requirement to within 24 hours. |
| Florida | 2017 | Chapter No. 2017-191 | HB 5203 | Prescription Drug Monitoring Program | Authorizes use of state funds for administration of program; removes requirement that implementation of program is contingent on non-state funding. |
| Florida | 2017 | Chapter No. 2017-70 | SB 2500 | Appropriations | In part, appropriates $550,000 to the Johns Hopkins All Children’s Hospital Mental Health Demonstration for Chronic Pain Patients. |
| Georgia | 2017 | Act 141 | HB 249 | Controlled substances; collect more information regarding dispensing and use; provisions | Changes the required time frame in which to report dispensation information to the PDMP from one week to 24 hours. Changes specifics related to delegate authority to access the PDMP. Current law states that nothing in this part shall require a dispenser or prescriber to obtain information about a patient from the PDMP. This bill would add, "provided, however, that dispensers are encouraged to obtain such information while keeping in mind that the purpose of such data base includes reducing duplicative prescribing and overprescribing of controlled substances." Requires a prescriber to seek and review information from the PDMP except under certain exemptions. Requires a prescriber who has reviewed PDMP information to make or cause to be made a notation in the patient's medical record stating the date and time upon which such inquiry was made and identifying the individual's name who made such search and review. |
| Georgia | 2017 | Act 237 | SB 106 | Pain Management Clinics; health care professionals who must be on-site; revise a provision | Revises a provision relating to the health care professionals who must be on-site at a pain management clinic in order for the clinic to provide medical treatment or services. |
| Georgia | 2017 | Georgia Medicaid | n/a | n/a | Georgia Medicaid made updates related to opioid quantity limits, opioid clinical criteria, and opioid step therapy requirements in their Fee-for-Service program in 2017. (According to a survey administered by the Henry J Kaiser Family Foundation to the State Medicaid Programs) |
| Hawaii | 2017 | Act 066 | SB 505 | Relating to Health | Requires prescribers of opioids to adopt and maintain written policies regarding informed consent. Defines "qualifying opioid therapy patient" to mean a patient requiring opioid treatment for more than three months, who is prescribed opioids and benzodiazepines together, or who is prescribed an opioid dose greater than 90 MME/day. Disallows initial concurrent opioid and benzodiazepine prescriptions unless medically necessary under certain circumstances. |
| Idaho | 2017 | Session Law Chapter 22 | H 5 | Controlled Substances, Opioids | Allows medical and pharmacy students to access the PDMP as a delegate of a supervising practitioner or pharmacist. Limits the Board of Pharmacy's recordkeeping of PDMP data to five years. Requires one-time pharmacist registration for free PDMP access in a manner similar to what is required for prescribers. |
| Idaho | 2017 | Idaho Code 37-2726 |  | Filing Prescriptions - Database | The board shall require pharmacists and prescribers, except veterinarians, to annually register with the board to obtain online access to the controlled substances prescriptions database. |
| Idaho | 2017 | Idaho Department of Health and Welfare (Medicaid) | n/a | n/a | Idaho Medicaid made updates to opioid quantity limits, prior authorization for opioids, opioid clinical criteria, and opioid step therapy requirements in their Fee-for-Service program. (According to a survey administered by the Henry J Kaiser Family Foundation to the State Medicaid Programs) |
| Idaho | 2017 | Idaho State Board of Medicine | n/a | Guidelines for the Chronic Use of Opioid Analgesics | Adopts the most up-to-date version of the Federation of State Medical Board's Model Policy for the Use of Opioid Analgesics in the Treatment of Chronic Pain. The guidelines issue recommendations related to patient evaluation and risk stratification, development of a treatment plan and goals, informed consent and treatment agreement, initiating an opioid trial, ongoing monitoring and adapting the treatment plan, periodic and unannounced drug testing, consultation and referral, discontinuing opioid therapy, medical records, and compliance with controlled substance laws and regulations. |
| Illinois | 2017 | Public Act 100-0513 | HB 313 | Nurse Practice Act - Various | Defines "focused assessment", "full practice authority", "oversight", and "postgraduate advanced practice nurse". Changes references of "advanced practice nurse" and "APN" to "advanced practice registered nurse" and "APRN" throughout the Act. Replaces provisions regarding nursing delegation with provisions that prohibit specified actions. Provides other guidelines for delegation of nursing activities and medication administration. Makes changes to education program requirements, qualifications for licensure, the scope of practice, and continuing education for LPN and RN licensees. |
| Illinois | 2017 | Public Act 100-0280 | HB 3910 | Controlled Sub-EMS Personnel | Amends the Illinois Controlled Substances Act. Provides that emergency medical services personnel may administer Schedule II, III, IV, or V controlled substances to a person in the scope of their employment without a written, electronic, or oral prescription of a prescriber. Defines emergency medical services personnel. Includes "emergency medical services personnel" in the definition of "practitioner" under the Act. |
| Illinois | 2017 | Illinois Department of Healthcare and Family Services (Medicaid) | n/a | n/a | Illinois Medicaid updated opioid quantity limits and opioid clinical criteria in their Fee-for-Service program. (According to a survey administered by the Henry J Kaiser Family Foundation to the State Medicaid Programs) |
| Indiana | 2017 | Public Law 164 | SB 151 | Information in INSPECT Prescription Drug Data Base | Requires the PDMP to include an entry for a dispenser to indicate if a patient has entered into a pain management contract with a designated practitioner. Allows the management performance hub and the state epidemiologist to obtain de-identified information from the INSPECT program. Requires the professional licensing agency (agency) to establish a workgroup consisting of emergency medical technicians, registered nurses, paramedics, pharmacists, physicians, law enforcement officers and physician assistants for the purpose of evaluating the cost and feasibility of cataloging: (1) each administration of an overdose intervention drug by an emergency medical services provider; and (2) data related to certain controlled substance investigations by law enforcement; in the INSPECT data base. Requires the agency to provide: (1) statutory recommendations; and (2) a written report; to the legislative council not later than December 1, 2017. |
| Indiana | 2017 | Public Law 182 | SB 226 | Prescribing and Dispensing of Opioids | Limits the amount of an opioid prescription a prescriber may issue for: (1) an adult who is being prescribed an opioid for the first time; and (2) a child; unless the prescription is for the treatment of specified conditions or circumstances. Requires documentation in the use of certain exemptions. Requires a prescriber to issue a prescription for an opioid in a lesser amount if requested by specified individuals and to document the request. Requires a pharmacist, upon the request of a specified individual, to partially fill the opioid prescription in compliance with federal law. Requires the pharmacist to document that the opioid prescription was partially filled. Requires the medical licensing board, in consultation with specified persons, to adopt emergency rules and rules concerning conditions that will be exempt from the prescription limitations. |
| Indiana | 2017 | Public Law 213 | SB 408 | INSPECT Program | Requires the board to report, before December 1, 2017, to the legislative council concerning grants or funding received and applied for by the state for integration of the INSPECT program data base with electronic health records. Urges the legislative council to assign to the appropriate study committee the topic of potential improvements to the INSPECT program. |
| Indiana | 2017 | Indiana Medicaid | n/a | n/a | Indiana Medicaid updated requirements related to opioid quantity limits, prior authorization for opioids, opioid clinical criteria, and opioid step therapy requirements in their Fee-for-Service program. Further, required use of the prescription monitoring program was implemented. (According to a survey administered by the Henry J Kaiser Family Foundation to the State Medicaid Programs) |
| Iowa | 2017 | Chapter 152 | HF 523 | Drug Prescribing and Dispensing Information Program - Medical Examiner Access to Information | Allows the board of pharmacy to provide information from the Iowa prescription monitoring program, to the state medical examiner or a county medical examiner, or a medical examiner investigator recognized by the state medical examiner, when the information requested by the examiner or investigator relates to an investigation being conducted by the examiner. |
| Iowa | 2017 | Pharmacy Board, Iowa Administrative Code |  | 657-10.24(124,126,155A) Prescription Requirements | Schedule 2 and Schedule 2N drugs require a properly executed, manually signed prescription or a prescription electronically prepared, signed, and transmitted pursuant to DEA requirements for electronic prescribing of controlled substances. NO REFILLS are permitted on these orders. All other scheduled drugs may be prescribed via written, oral, or DEA-compliant electronic prescription orders. Written prescriptions must be signed by the prescriber. A prescriber may ask an assistant to write or type the prescription or to prepare an electronic prescription but the prescriber is responsible for ensuring that all information is correct and the prescriber must manually or electronically sign the prescription, as appropriate. |
| Iowa | 2017 | Pharmacy Board, Iowa Administrative Code |  | 657-10.26(124) Schedule II emergency prescriptions | Outlines requirements and limitations regarding emergency prescriptions for Schedule II controlled substances. |
| Iowa | 2017 | Pharmacy Board, Iowa Administrative Code |  | 657-10.29(124) Schedule II--Issuing multiple prescriptions | Allows an individual prescriber to issue multiple prescriptions authorizing the patient to receive a total of up to a 90-day supply of a Schedule II controlled substance pursuant to the provisions and limitations of this rule. |
| Iowa | 2017 | Pharmacy Board, Iowa Administrative Code |  | 657-10.30(124) Schedule II--changes to a prescription | Outlines which changes a pharmacist may make, with appropriate verification, to a patient's prescription for a Schedule II controlled substance, including changes to drug strength, form, quantity, and directions. |
| Iowa | 2017 | Iowa Department of Human Services (Medicaid) | n/a | n/a | Iowa Medicaid expressed that they planned to adopt the CDC Guideline for Prescribing Opioids for Chronic Pain in their Fee-for-Service program in 2017. Further, they planned to require that Managed Care Organizations adopt the guideline. (According to a 2016 survey administered by the Henry J Kaiser Family Foundation to the State Medicaid Programs) |
| Kansas | 2017 | KanCare (Medicaid) | n/a | n/a | Kansas Medicaid implemented opioid step therapy requirements in their Fee-for-Service program in 2017. Updates were also made to requirements related to prior authorization for opioids. (According to a 2016 survey administered by the Henry J Kaiser Family Foundation to the State Medicaid Programs) |
| Kentucky | 2017 | Acts, Chapter 138 | HB 314 | An Act Relating to Controlled Substance Monitoring | Existing law only required that dispensers report to the PDMP. This bill added a corresponding requirement that prescribers report to the PDMP. Requires a Kentucky-licensed acute care hospital or critical access hospital to report to the cabinet all positive toxicology screens that were performed by the hospital's emergency department prior to the patient's admission to the hospital to evaluate the patient's suspected drug overdose. Adds an allowance for a practitioner or pharmacist, or employee of the practitioner's or pharmacist's practice acting under the specific direction of the practitioner or pharmacist, to check the PDMP to access data on controlled substances that have been administered or dispensed to the birth mother of an infant who is currently being treated by the practitioner for neonatal abstinence syndrome; or has symptoms that suggest prenatal drug exposure. |
| Kentucky | 2017 | Acts, Chapter 168 | HB 333 | An Act Relating to Controlled Substances | Requires state licensing boards to promulgate regulations limiting prescriptions for Schedule II controlled substances for acute pain to a three day supply, with certain exceptions. Creates a new offense of trafficking in a misrepresented controlled substance. |
| Kentucky | 2017 | Acts, Chapter 120 | SB 32 | An Act Relating to the Tracking of Drug Convictions | Requires the Administrative Office of the Courts to forward drug conviction data to the Cabinet for Health and Family Services for inclusion in the KASPER electronic monitoring system. |
| Kentucky | 2017 | Acts, Chapter 113 | SB 205 | An Act Relating to Prescription Drugs | Unless the practitioner has specified on the prescription drug order that dispensing a prescription for a noncontrolled maintenance drug in an in an initial amount followed by periodic refills is medically necessary, a pharmacist may exercise professional judgement to dispense varying quantities of the prescribed drug per fill up to the total number of dosage units as authorized by the practitioner on the prescription drug order, including any refills, up to a 90 day supply. This section does not apply to controlled substances or to any drugs for which a report is required to the PDMP. |
| Kentucky | 2017 | Ky. Rev. Stat. Ann. § 218A.205(3)(b) | Implementing HB 333 (2017) | Reports of improper, inappropriate, or illegal prescribing or dispensing of controlled substances -- Administrative regulations for prescribing and dispensing protocols and licensure actions and requirements -- Complaint procedure -- Criminal record check. | Limits Schedule II opioid prescriptions for acute pain to three day supplies, with exceptions. |
| Kentucky | 2017 | Department of Medicaid Services | n/a | n/a | Kentucky Medicaid made updates related to opioid quantity limits, prior authorization for opioids, opioid step therapy requirements, and opioid clinical criteria in their Fee-for-Service program in 2017. Requirements related to PDMP use were updated. (According to a survey administered by the Henry J Kaiser Family Foundation to the State Medicaid Programs) |
| Louisiana | 2017 | Act 82 | HB 192 | DRUGS/CONTROLLED: Provides for limitations on the prescribing of opioids | Limits opioid prescriptions to seven days, with exceptions. Authorizes a prescription to be filled for a lesser quantity than the maximum prescribed amount. |
| Louisiana | 2017 | Act 88 | HB 490 | DRUGS/PRESCRIPTION: Creates the Advisory Council on Heroin and Opioid Prevention and Education | Establishes the Advisory Council on Heroin and Opioid Prevention and Education within the Drug Policy Board. Requires the council to coordinate parish-level data on opioid overdoses and usage of overdose-reversal medication as current and accurate statewide data is critical in educating both those involved in policy development and the citizens of this state. Requires the council to also coordinate a central online location to disseminate information and resources, including the Interagency Heroin and Opioid Coordination Plan. |
| Louisiana | 2017 | Act 76 | SB 55 | HEALTH CARE: Provides relative to prescribers of controlled dangerous substances. | Clarifies that individuals who conduct research with, procure, possess, or prescribe controlled dangerous substances in La. must also obtain a license to do so in Louisiana prior to engaging in any such activity. Establishes a process for automatic enrollment into the PDMP upon initial licensure or upon annual renewal of a prescriber's controlled dangerous substance license. Expands the mandate to access the program prior to initially prescribing any opioid or if the patient's course of treatment continues for more than 90 days, with exceptions. Requires all prescribers in La. to obtain three continuing education credit hours in drug diversion training, best practice prescribing of controlled substances, and appropriate treatment for addiction as a prerequisite of license renewal in the first annual renewal cycle after Jan. 1, 2018. Successful completion of the requirement once shall satisfy the requirement in full. |
| Louisiana | 2017 | Act 241 | SB 96 | CONTROL DANGER SUBSTANCE: Provides relative to the prescription monitoring program. | Provides for access to PDMP information and audit trail information. Adds persons and entities to the list of those who may access the PDMP. |
| Louisiana | 2017 | Louisiana Department of Health (Medicaid) | n/a | 2017-23: Opioid Prescription Policy Update | Effective July 10, 2017, LDH will implement seven-day quantity limits for short-acting (SA) opioids for opioid naïve recipients enrolled in Healthy Louisiana Managed Care Organizations (MCO) and Fee for Service (FFS). MCOs, including Louisiana Healthcare Connections, are directed to implement the following opioid quantity limits at the Point of Sale (POS) on July 10, 2017, for opioid naïve recipients (no opioids in the most current 90-day period). Prior Authorization override provisions will be implemented to allow for medically necessary quantities above limits. To mitigate administrative burden for prescribing providers, LDH is mandating the use of a standardized Opioid Analgesic Treatment Worksheet to request overrides and prior authorizations for medically necessary quantities of opioids in excess of the following limits. |
| Louisiana | 2017 | Louisiana Department of Health (Medicaid) | n/a | 2017-38: Opioid Prescription Policy Update | Effective September 12, 2017, the Louisiana Department of Health (LDH) will implement updated short-acting opioid quantity limits for Medicaid pharmacy claims for opioid naïve (no opioids in the most current 90-day period). Opioid prescriptions for chronic and naïve recipients will be decreased to a Morphine Equivalent Dosing (MED) limit of 90 mg per day. Prescriptions and cumulative MEDs above 90 mg per day should deny at the Point of Sale. Recipients with a diagnosis of cancer and palliative care are exempt from the MED requirements. To mitigate administrative burden for prescribing providers, LDH is mandating the use of a standardized Opioid Analgesic Treatment Worksheet to request overrides and Prior Authorizations (PAs) for medically necessary quantities of opioids in excess of the established limits. |
| Louisiana | 2017 | Louisiana Department of Health (Medicaid) | n/a | Louisiana Medicaid Opioid Prescription Policy | For patients with acute pain, limits Medicaid opioid quantity to: 15 days for fee for service patients; 15 days for opioid-naïve managed care organization patients; no more than 120 MME/day. For patients with chronic pain, limits Medicaid opioid quantity to: 15 days for fee for service patients; no more than 120 MME/day by July 10, 2017; no more than 90 MME/day by September 12, 2017. |
| Maine | 2017 | Chapter 87 | LD 184 | An Act To Allow Hospitals To More Efficiently Monitor the Prescribing of Controlled Substances by Amending the Laws Governing Access to Prescription Monitoring Information | Allows PDMP access to the chief medical officer, medical director, or other administrative prescriber employed by a licensed hospital, insofar as the information relates to prescriptions written by prescribers employed by that licensed hospital. |
| Maine | 2017 | Chapter 122 | LD 273 | An Act To Add an Exception to Prescription Monitoring Program Requirements | The requirements to check the PDMP do not apply when a licensed or certified health care professional: 1. Directly orders or administers a benzodiazepine or opioid medication to a person in an emergency room setting, an inpatient hospital setting, a long-term care facility, or a residential care facility; or 2. Directly orders, prescribes, or administers a benzodiazepine or opioid medication to a person suffering from pain associated with cancer treatment or end-of-life, palliative, or hospice care. |
| Maine | 2017 | Chapter 186 | LD 479 | An Act to Inform Patients of the Dangers of Addicting Opioids | Requires that a health care provider who is a prescriber of opioid medication must, before prescribing an opioid medication, inform the patient of the risks of using the opioid medication, including but not limited to the risk of forming an addiction to the opioid medication, and receive from the patient a written certification that the patient has been provided that information. All health care entities that prescribe opioid medications must have an opioid medication prescribing policy in place. |
| Maine | 2017 | Chapter 213 | LD 1031 | An Act To Clarify the Opioid Medication Prescribing Limits Laws | In the laws governing the Palliative Care and Quality of Life Interdisciplinary Advisory Council, it changes the definition of "palliative care" to clarify that palliative care does not always include a requirement for hospice care or attention to spiritual needs and includes chronic, unremitting or intractable pain such as neuropathic pain as an example of "serious illness." Changes the definition of "dispenser" to remove health care professionals. Removes the requirement to submit to the PDMP regarding a controlled substance that is dispensed by a hospital emergency department for use during a period of 48 hours or less. Adds to the list of individuals who can access the PDMP the staff members of a group practice of prescribers who are authorized by a designated group practice leader, insofar as the information relates to a patient receiving care from that group practice. Removes the requirement for a dispenser to notify the PDMP if the dispenser has reason to believe that a prescription is fraudulent or duplicative, maintaining the requirement that the dispenser contact the prescriber. Clarifies that the requirement to check the PDMP does not apply for surgical procedures, rather than only inpatient surgery. Clarifies that dispensing in connection with surgical procedures is exempt from the 100 morphine milligram equivalents limitation on opioids. Clarifies that an opioid product that is labeled by the federal Food and Drug Administration to be dispensed only in a stock bottle that exceeds a 7-day supply may be prescribed as long as the amount dispensed does not exceed a 14-day supply. Makes all rules related to the PDMP major substantive rules except that the Department of Health and Human Services is directed to adopt routine technical rules to conform to the changes in the definition of "dispenser" and the removal of the requirement of a pharmacist to notify the program when a prescription appears fraudulent or duplicative. |
| Maine | 2017 | Chapter 16 | LD 1363 | Resolve, Regarding Legislative Review of Portions of Chapter 11: Rules Governing the Controlled Substances Prescription Monitoring Program and Prescription of Opioid Medications, a Late-filed Major Substantive Rule of the Department of Health and Human Services | Amends exemptions related to opioid limits. Provides for early refills under certain circumstances. Allows for dispensers to contact prescribers via phone to verify prescriptions. Establishes a process for dispensers who receive out-out-state prescriptions for opioids. Delays the requirement for dispensers to provide information to the PDMP on the exemption codes and ICD-10 codes. |
| Maine | 2017 | Chapter 243 | LD 1619 | An Act To Report Limited Information to the Controlled Substances Prescription Monitoring Program Concerning Methadone | Establishes PDMP rules related to patients receiving methadone treatment, |
| Maine | 2017 | Department of Health and Human Services, MaineCare Services | Implementing P.L. 2015, ch. 488 | 14-118 C.M.R. Chapter 11, Rules Governing the Controlled Substances Prescription Monitoring Program and Prescription of Opioid Medications | This adopted rulemaking makes the following changes: (1) Adds definitions (including definitions for “administer”, “acute pain”, “Benzodiazepine”, “chronic pain”, “hospital”, “opioid medication”, “serious illness” and also includes veterinarians in the definition of “prescribers”; (2) Adds general requirements for prescribing and dispensing, including the requirement that all prescribers must acquire DEA numbers and include the DEA number on each prescription, and includes exemption codes to match the exemptions from the opioid limitations set forth in the rule; (3) Requires prescribers, dispensers and veterinarians to register as PDMP data requesters; (4) Requires prescribers include a designation on the prescription as to whether the prescription is for the treatment of acute or chronic pain; (5) Indicates the statutory requirement regarding electronic prescriptions and waivers of such; (6) Requires that dispensers report information to the PDMP by electronic means and indicates the statutory waivers of such; (7) Requires prescribers, dispensers and veterinarians to check the PDMP system; (8) Indicates the statutory limits on opioid medication prescribing; (9) Defines exemptions to limits on opioid medication prescribing; (10) Authorizes the Department to provide and receive PDMP data from another state or Canadian province that has entered into an agreement with the Department for such sharing; (11) Establishes civil violations for prescribers and dispensers; (12) Establishes administrative sanctions for prescribers and dispensers; (13) Establishes standards for immunity from liability for disclosure of information; (14) Establishes standards for immunity from liability for a pharmacists which might result from dispensing medication in excess of the limit, if such dispensing was done in accordance with a prescription issued by a practitioner; (15) Authorizes the Department to verify and audit prescriber and dispenser compliance with the rules. |
| Maine | 2017 | Chapter 48: Board of Licensure in Medicine | Implementing LD 1031 (2017) | §3300-F. Requirements regarding prescription of opioid medication | Limits opioid prescriptions to no more than 100 MME/day. For patients already receiving in excess of 100 MME/day, they may immediately receive no more than 300 MME/day; on or after July 1, 2017, they may not receive more than 100 MME/day. No more than a 7 day supply of opioids may be dispensed in most cases, no more than 14 days for acute pain at all. Requires electronic prescriptions of opioid medications. Requires prescribers to obtain 3 hours of continuing education every 3 years related to the prescription of opioid medication. Requires all health care entities to have an opioid medication prescribing policy in place. |
| Maine | 2017 | Chapter 1603: Controlled Substances Prescription Monitoring | Implementing LD 1031 (2017) | §7253. Prescribers and dispensers required to check prescription monitoring information | Prescribers must check the PDMP prior to an initial prescription of opioids or benzodiazepines, and then again every 90 days. Outlines circumstances under which the dispenser must check the PDMP. Contains exceptions. |
| Maine | 2017 | Department of Health and Human Services, MaineCare Services (Medicaid) | n/a | n/a | MaineCare Services expressed that they planned to adopt the CDC Guideline for Prescribing Opioids for Chronic Pain in their Fee-for-Service program in 2017. Updates were also made to prior authorization requirements for opioids. (According to a 2016 survey administered by the Henry J Kaiser Family Foundation to the State Medicaid Programs) |
| Maryland | 2017 | Chapter 570 | HB 1432 | The Prescriber Limits Act of 2017 | Requiring health care providers to prescribe the lowest effective dose of an opioid and in a quantity no greater than the quantity needed for the expected duration of specified pain unless the opioid is prescribed to treat a specified disorder or specified pain; requiring the dosage, quantity, and duration of specified prescribed opioids to be based on an evidence-based clinical guideline for prescribing controlled dangerous substances; authorizing specified disciplinary action by health occupations boards; etc. |
| Maryland | 2017 | Chapter 569 | SB 539 | Criminal Law - Distribution of Controlled Dangerous Substances - Fentanyl | A person may not distribute an opioid or opioid analogue, the use of which causes the death of another. It is not a defense that the defendant did not distribute the opioid or opioid analogue directly to the decedent. Contains defenses. |
| Maryland | 2017 | MD Health Occ Code § 1-223 (2017) | Implementing HB 1432 (2017) | Limits on prescribing opioids. | On treatment for pain, a health care provider, based on the clinical judgment of the health care provider, shall prescribe: (1) The lowest effective dose of an opioid; and (2) A quantity that is no greater than the quantity needed for the expected duration of pain severe enough to require an opioid that is a controlled dangerous substance unless the opioid is prescribed to treat: (i) A substance-related disorder; (ii) Pain associated with a cancer diagnosis; (iii) Pain experienced while the patient is receiving end-of-life, hospice, or palliative care services; or (iv) Chronic pain. The dosage, quantity, and duration of an opioid shall be based on an evidence-based clinical guideline for prescribing controlled dangerous substances that is appropriate for: (1) The health care service delivery setting for the patient; (2) The type of health care services required by the patient; and (3) The age and health status of the patient. |
| Maryland | 2017 | Maryland Medicaid | n/a | Opioid Prescribing Guidance & Policy | Policy 1 improves coverage for non-opioid medication options. Policy 2 requires prior authorization every six months for opioid doses of >90 MME/day, more than 30 days, or long acting opioids, fentanyl, or methadone for pain. Prior authorization requires at minimum: checking PDMP, utilizing urine drug screens, offering naloxone, use of a treatment agreement, and attesting that the benefit outweighs the risk. Policy 3 suggests use of a standardized tool for screening for substance use disorders. Policy 4 is in regard to referring patients to SUD treatment. Policy 5 encourages prescribing naloxone to "high risk" patients, including those with a daily dose of >50 MME/day. Policy 6 suggests use of PDMP prior to prescribing a controlled substance. |
| Maryland | 2017 | Maryland Medicaid | n/a | Opioid Prior Authorization Indications | All pill forms of all opioids have a 30 day quantity limit of 180 or less. Prior authorization is required if: (1) exceeding a 30 day quantity limit; (2) exceeding daily dose of 90 MME (cumulative of all opioids prescribed); or (3) any prescription for fentanyl, methadone (for pain), or any long-acting opioids. Individual types of opioids have a variety of daily quantity limits and 30 day quantity limits (see policy for details). |
| Massachusetts | 2017 | MassHealth (Medicaid) | n/a | n/a | MassHealth began requiring use of the prescription monitoring program in their Fee-for-Service program. (According to a survey administered by the Henry J Kaiser Family Foundation to the State Medicaid Programs) |
| Michigan | 2017 | Public Act 107 | HB 4323 | Appropriations; omnibus; appropriations for fiscal year 2017-2018; provide. Creates appropriation act. | Appropriates funds for pain management education and controlled substances electronic monitoring and diversion prevention. |
| Michigan | 2017 | Public Act 246 | HB 4408 | Health; pharmaceuticals; parental consent when prescribing a controlled substance containing an opioid; require under certain circumstances and require health professionals to provide certain information on opioids to patients. | Requires prescribers to provide Opioid Education using the state’s or similar Start Talking Form when prescribing an Opioid drug. It does not have to be used when prescribing any other controlled substance that does not contain an Opioid. This form must be completed and saved to the patient’s medical record only when prescribing an Opioid drug. |
| Michigan | 2017 | Public Act 252 | SB 47 | Health; pharmaceuticals; exemption of reporting requirements from the Michigan automated prescription system (MAPS); modify, and require prescribers to obtain data from the MAPS before prescribing or dispensing certain drugs. | Provides that before dispensing or prescribing buprenorphine or a drug containing buprenorphine or methadone to a patient in a substance disorder program, the prescriber shall obtain and review a MAPS report on the patient. A prescriber shall report data to MAPS if federal law does not prohibit the reporting of data concerning the patient, to LARA. R 338.3162E is rescinded from the pharmacy rules, and deals with exemptions to MAPS reporting requirements. |
| Michigan | 2017 | Public Act 248 | SB 166 | Health occupations; health professionals; prescribers to register with the Michigan automated prescription system (MAPS) and obtain a report from MAPS before prescribing or dispensing a controlled substance; require. | Beginning June 1, 2018, before prescribing or dispensing to a patient a controlled substance in a quantity that exceeds a 3-day supply, a licensed prescriber shall obtain and review a MAPS report concerning that patient. The requirement does not apply in any of the following circumstances: If the dispensing occurs in a hospital or a freestanding surgical outpatient facility and the controlled substance is administered to the patient in the hospital or facility; If the patient is an animal, the dispensing occurs in a veterinary hospital or clinic, and the controlled substance is administered to the animal in that hospital or clinic; If the controlled substance is prescribed by a licensed prescriber who is a veterinarian and the controlled substance will be dispensed by a pharmacist. Beginning June 1, 2018, before prescribing or dispensing a controlled substance to a patient, a licensed prescriber shall register with MAPS. |
| Michigan | 2017 | Public Act 249 | SB 167 | Health occupations; health professionals; prescribers to register with the Michigan automated prescription system (MAPS) and obtain a report from MAPS before prescribing or dispensing a controlled substance; require, and provide for sanctions under certain circumstances. | Contains many provisions found in other bills (SB 270, SB 166), as it is being used as a vehicle to correct conflicts created by the package of bills being passed. Creates penalties related to non-use of the PDMP. |
| Michigan | 2017 | Public Act 22 | SB 213 | Health; other; prescribing drugs, including controlled substances, via telehealth; provide for under certain circumstances and allow Michigan board of nursing to promulgate certain rules for clinical nurse specialists. | Allows a health professional to prescribe a controlled substance via telehealth if they comply with both of the following: 1. If the health professional considers it medically necessary, he or she shall provide the patient with a referral for other health care services that are geographically accessible to the patient, including, but not limited to, emergency services. 2. After providing a telehealth service, the health professional, or a health professional who is acting under the delegation of the delegating health professional, shall make himself or herself available to provide follow-up health care services to the patient or refer the patient to another health professional for follow-up health care services. |
| Michigan | 2017 | Public Act 247 | SB 270 | Health; controlled substances; bona fide prescriber-patient relationship before prescribing schedule 2 to 5 controlled substances; require in certain circumstances. | A licensed provider may not prescribe a controlled substance listed in schedules 2 to 5 unless the prescriber is in a bona fide prescriber-patient relationship with the patient being prescribed the controlled substance. |
| Michigan | 2017 | Public Act 251 | SB 274 | Health; controlled substances; prescription for opioids; limit for acute pain and allow for the partial filling of certain controlled substance prescriptions if consistent with federal law. | Allows pharmacist to fill partially in increments a prescription for a Schedule 2 controlled substance in certain situations. Beginning July 1, 2018, if a prescriber is treating a patient for acute pain, the prescriber shall not prescribe the patient more than a 7-day supply of an opioid within a 7-day period. |
| Michigan | 2017 | Public Act 165 | SB 360 | Health occupations; pharmacists; dispensing additional quantities of a prescription drug within the limits of the prescription; allow under certain circumstances. | If, after consulting with a patient, a pharmacist determines in the exercise of his or her professional judgment that dispensing additional quantities of a prescription drug is appropriate for the patient, the pharmacist may dispense, at one time, additional quantities of the prescription drug up to the total number of dosage units authorized by the prescriber on the original prescription for the patient and any refills of the prescription. Except for a controlled substance included in schedule 5 that does not contain an opioid, this subsection does not apply to a prescription for a controlled substance. |
| Michigan | 2017 | Michigan Medicaid | n/a | n/a | Michigan Medicaid expressed that they planned to adopt the CDC Guideline for Prescribing Opioids for Chronic Pain in their Fee-for-Service program in 2017. Further, updates were made to opioid quantity limits, prior authorization requirements for opioids, opioid clinical criteria, and opioid step therapy requirements. (According to a 2016 survey administered by the Henry J Kaiser Family Foundation to the State Medicaid Programs) |
| Minnesota | 2017 | Chapter 6 | SF No. 2 (1st Special Session) | Limit on quantity of opiates prescribed for acute dental and ophthalmic pain. | When used for the treatment of acute dental pain or acute pain associated with refractive surgery, prescriptions for opiate or narcotic pain relievers listed in Schedules II through IV of section 152.02 shall not exceed a four-day supply. |
| Mississippi | 2017 | Chapter 334 | HB 1032 | Prescription Monitoring Program; require all health care providers authorized to prescribe drugs to register with. | All licensed practitioners holding an active DEA number shall register as users of the PDMP. |
| Mississippi | 2017 | Mississippi Division of Medicaid | n/a | n/a | Mississippi Division of Medicaid expressed that they planned to adopt the CDC Guideline for Prescribing Opioids for Chronic Pain in their Fee-for-Service program in 2017. Further, they planned to require that Managed Care Organizations adopt the guideline. (According to a 2016 survey administered by the Henry J Kaiser Family Foundation to the State Medicaid Programs) |
| Missouri | 2017 | MO Rev Stat § 338.710 | SB 139 | Modifies Provisions Relating to Health Care | Creates the Rx Cares for Missouri Program (Medicaid) to promote medication safety and prevent prescription drug abuse. After a full year of program operation, the board shall prepare and submit an evaluation report to the governor and the general assembly describing the operation of the program and the funds allocated. Unless otherwise authorized by the general assembly, the program shall expire on August 28, 2019. |
| Missouri | 2017 | MO HealthNet (Medicaid) | n/a | n/a | MO HealthNet implemented step therapy requirements for opioids for their fee-for-service programs in 2017. Updates were made to opioid quantity limits, prior authorization for opioids, and opioid clinical criteria. (According to a 2016 survey administered by the Henry J Kaiser Family Foundation to the State Medicaid Programs) |
| Montana | 2017 | Montana Medicaid | n/a | n/a | Montana Medicaid updated their opioid quantity limits, prior authorization requirements for opioids, opioid clinical criteria, and opioid step therapy requirements in their Fee-for-Service program in 2017. (According to a 2016 survey administered by the Henry J Kaiser Family Foundation to the State Medicaid Programs) |
| Nebraska | 2017 | Section 71-2454 | LB 223 | Change provisions relating to prescription drug monitoring | Makes PDMP data available to the statewide health information exchange. No patient-identifying data shall be disclosed except to the statewide HIE and to prescribers and dispensers, as provided. Training shall be required for all with access to the PDMP. |
| Nebraska | 2017 | Department of Health and Human Services | n/a | Nebraska Pain Management Guidance Document | The guideline, compiled by the Nebraska Pain Management Task Force, covers topics such as: morphine milligram equivalents, assessment, non-opioid treatments, acute pain, chronic pain, opioid treatment, treatment agreements, screening and evaluation, trauma, pain in special populations, tapering, PDMP, and more. |
| Nebraska | 2017 | Department of Health and Human Services, Division of Medicaid and Long-Term Care | n/a | n/a | Nebraska Medicaid expressed that they planned to require that Managed Care Organizations adopt the CDC Guideline for Prescribing Opioids for Chronic Pain. They also made updates to their fee-for-service programs for FY 2017 related to prior authorization for opioids and opioid step therapy requirements. (According to a 2016 survey administered by the Henry J Kaiser Family Foundation to the State Medicaid Programs) |
| Nebraska | 2017 | Department of Health and Human Services, Division of Medicaid and Long-Term Care | n/a | n/a | Patients identified as receiving more than 150 doses of a short-acting opioid, such as oxycodone or hydrocodone in a 30-day period (excluding cancer patients) are flagged, and every physician who has prescribed opioids for that patient is contacted. On October 1, 2017, Nebraska Medicaid claims for more than 150 doses of short-acting opioids in 30 days started being rejected at pharmacies. Medicaid is tracking the number of members receiving opioid and medication assisted treatment drug prescriptions from Nebraska Medicaid by month. Abuse-deterrent formulations of pain medications were added to the preferred drug list (Butrans and Hysingla ER) and an unsafe, inexpensive pain medication was removed from the preferred list (methadone). |
| Nevada | 2017 | Chapter 605 | AB 474 | Makes various changes relating to drug overdoses and prescribing and using drugs. | Requiring certain persons to make a report of a drug overdose or suspected drug overdose; revising provisions concerning the computerized program to track each prescription for a controlled substance; revising provisions governing the accessibility of health care records in certain investigations; requiring an occupational licensing board that licenses certain practitioners who are authorized to prescribe controlled substances to review and evaluate information and impose disciplinary action in certain circumstances; authorizing such an occupational licensing board to suspend the authority of a practitioner to prescribe, administer or dispense a controlled substance in certain circumstances; imposing certain requirements concerning the prescription of a controlled substance; revising the required contents of certain written prescriptions; providing a penalty; and providing other matters properly relating thereto. |
| Nevada | 2017 | Chapter 219 | SB 59 | Revises provisions relating to the program to monitor prescriptions for certain controlled substances. | Expands the PDMP to also include Schedule V controlled substances. Requires a law enforcement officer who encounters certain situations involving prescribed controlled substances or who receives a report of a stolen prescription for a controlled substance while acting in his or her official capacity to report certain information to his or her employer. Further, the employer of the law enforcement officer must upload such reported information to the PDMP as soon as practicable after receiving the information unless the employer determines that uploading the information will interfere with an active criminal investigation, in which case the employer may postpone uploading the information until after the conclusion of the investigation. Each law enforcement officer or employer of such officer who makes a good faith effort to comply with these mandates is immune from civil and criminal liability for any act or omission relating to the transmission of information pursuant to this Act. |
| Nevada | 2017 | State Board of Pharmacy | n/a | R013-18 A regulation relating to controlled substances; etc. | Requires a practitioner or other person who is required to register with the Board to dispense controlled substances to enroll with the Board for Internet access to the prescription monitoring program. Authorizes a practitioner and a hospital, respectively, to designate certain persons as delegates for the purpose of accessing the PDMP. Delegates must complete training, and practitioners are held liable actions of the delegate. |
| Nevada | 2017 | State Board of Pharmacy | Implementing AB 474 (2018) | R047-18 A regulation relating to controlled substances | Defining "acute pain", "initial prescription, and "course of treatment" for the purposes of provisions relating to the prescription of controlled substances; requiring a review of the medical history of a patient and physical examination of a patient conducted for certain purposes to be targeted to the condition causing the pain of the patient; specifying the conditions under which a practitioner will be determined to have made a good faith effort to obtain the medical records of the patient for certain purposes; specifying certain conditions under which a practitioner will be deemed to have obtained the informed written consent of a patient; clarifying that a practitioner may prescribe a controlled substance under certain conditions; clarifying that a patient may enter into a prescription medication agreement with a group of practitioners; requiring a practitioner to review and update a prescription medication agreement under certain circumstances; and providing other matters properly relating thereto. |
| Nevada | 2017 | Division of Health Care Financing and Policy (Medicaid) | n/a | n/a | Nevada Medicaid made updates to opioid quantity limits, prior authorization for opioids, opioid clinical criteria, and opioid step therapy requirements in their Fee-for-Service program in 2017. (According to a 2016 survey administered by the Henry J Kaiser Family Foundation to the State Medicaid Programs) |
| New Hampshire | 2017 | NH Medicaid | n/a | n/a | New Hampshire Medicaid expressed that they planned to adopt the CDC Guideline for Prescribing Opioids for Chronic Pain in their Fee-for-Service program in 2017. Further, they planned to require that Managed Care Organizations adopt the guideline. Updates were made to prior authorization requirements for opioids, opioid clinical criteria, opioid step therapy requirements, and required use of the prescription monitoring program. (According to a 2016 survey administered by the Henry J Kaiser Family Foundation to the State Medicaid Programs) |
| New Jersey | 2017 | Assembly Resolution 157 | AR 157 | Urges State Board of Medical Examiners to adopt CDC guideline for prescribing opioids for chronic pain. | Urges State Board of Medical Examiners to adopt CDC guideline for prescribing opioids for chronic pain. |
| New Jersey | 2017 | P.L.2017, Chapter 28 | S 3 | Requires health insurance coverage for treatment of substance use disorders; places certain restrictions on the prescription of opioid and certain other drugs; concerns continuing education related thereto. | Limits initial opioid prescriptions to five days. Sets requirements that must be followed when prescribing opioids. Requires PDMP checks. Requires one credit of educational programs or topics on issues concerning prescription opioid drugs, including responsible prescribing practices, alternatives to opioids for managing and treating pain, and the risks and signs of opioid abuse, addiction, and diversion. |
| New Jersey | 2017 | P.L.2017, Chapter 8 | S 2156 | Requires prescribers to discuss addiction risk associated with certain drugs prior to issuing prescription to minor patient. | Requires prescribers to discuss addiction risk associated with Schedule II controlled dangerous substances prior to issuing prescription to minor patient. |
| New Jersey | 2017 | Division of Consumer Affairs | Implementing S 3 (2017) | 13:35-7.6 Limitations on Prescribing, Administering, or Dispensing of Controlled Substances; Special Requirements for Management of Acute and Chronic Pain | Limits initial opioid prescriptions to five days. Sets requirements that must be followed when prescribing opioids. Requires PDMP checks. Requires one credit of educational programs or topics on issues concerning prescription opioid drugs, including responsible prescribing practices, alternatives to opioids for managing and treating pain, and the risks and signs of opioid abuse, addiction, and diversion. |
| New Jersey | 2017 | Division of Consumer Affairs | n/a | Adopted Amendments: N.J.A.C. 13:45A-35.1, 35.2, 35.6, 35.10, and 35.11 Purpose and Scope; Definitions; Access to Prescription Monitoring Information; Retention of Information; Recordkeeping; Professional Misconduct | Requires the director of the division to review PDMP information to identify whether: (1) any person is obtaining a prescription in a manner that may be indicative of misuse, abuse, or diversion of a controlled dangerous substance; when an evaluation of the information indicates that a person may be obtaining a prescription for the same or similar controlled dangerous substance from multiple practitioners or pharmacies during the same period, the Division may provide PDMP information about the person to practitioners and pharmacies; and (2) a violation of law or regulation or breach of the applicable standards of practice by any person may have occurred, including, but not limited to, diversion of a controlled dangerous substance; if the Division determines that such a violation or breach may have occurred, the Division shall notify the appropriate law enforcement agency or professional licensing board and provide the PDMP information required for an investigation. |
| New Jersey | 2017 | New Jersey Medicaid | n/a | n/a | New Jersey Medicaid updated opioid quantity limits, prior authorization requirements for opioids, and opioid clinical criteria in their Fee-for-Service program in 2017. (According to a 2016 survey administered by the Henry J Kaiser Family Foundation to the State Medicaid Programs) |
| North Carolina | 2017 | SL 2017-74 | H 243 | Strengthen Opioid Misuse Prevention (STOP) Act | Establishes rules for prescribing Schedule II - V controlled substances by physician assistants and nurse practitioners. Requires electronic prescriptions for Schedule II through V, with exceptions. Limits initial prescriptions of all controlled substances in Schedules II through V to no more than a five day supply if the prescription is for pain, with exceptions. Provides for disposal of pain medications related to palliative and hospice care. Places a limitation on co-payments for limited, initial opioid prescriptions. Allows unsolicited reports to be sent to practitioners notifying them of their prescribing behavior. Allows the release of PDMP data to third-party payers. Mandatory PDMP registration for dispensers. Mandatory PDMP checks by prescribers when initially prescribing Schedule II through V, then every three months. Mandatory PDMP checks by dispensers in certain circumstances. |
| North Carolina | 2017 | North Carolina Medical Board | n/a | Policy for the use of opioids for the treatment of pain | In order to provide its licensees with guidance that reflects the most current medical and scientific research and recommended practices, the Board has decided to adopt and endorse the CDC Guideline for Prescribing Opioids for Chronic Pain written and maintained by the Centers for Disease Control and Prevention (“CDC”). |
| North Carolina | 2017 | NC Medicaid and Health Choice | n/a | n/a | North Carolina Medicaid expressed that they planned to adopt the CDC Guideline for Prescribing Opioids for Chronic Pain in their Fee-for-Service program in 2017. Updates were also made to opioid quantity limits, prior authorization for opioids, and opioid clinical criteria. (According to a 2016 survey administered by the Henry J Kaiser Family Foundation to the State Medicaid Programs) |
| North Dakota | 2017 | Subsection 3 of section 19‑03.5‑01 of the North Dakota Century Code | HB 1099 | Relating to the definition of controlled substance. | Amends the definition of "controlled substance", removing language that included "nonscheduled substances containing tramadol or carisoprodol" and adding language that includes "nonscheduled substances containing gabapentin." |
| North Dakota | 2017 | Section 23‑34‑01 of the North Dakota Century Code | SB 2089 | Relating to Medical Peer Reviews | Amends the definition of "health care organization" so that it includes "Any state designated multi-disciplinary peer review entity designated to evaluate controlled substance practices in a referred case." |
| Ohio | 2017 | Ohio Department of Medicaid | n/a | n/a | Ohio Medicaid updated opioid quantity limits, opioid clinical criteria, and opioid step therapy requirements in their Fee-for-Service program in 2017. (According to a 2016 survey administered by the Henry J Kaiser Family Foundation to the State Medicaid Programs) |
| Oklahoma | 2017 | SCR 12 | SCR 12 | Concurrent resolution creating the Oklahoma Commission of Opioid Abuse. | Creates the Oklahoma Commission of Opioid Abuse. The Commission shall study, evaluate and make recommendations for any changes to state policy, rules or statutes to better combat opioid abuse in Oklahoma. The Commission shall also prepare a report of its findings and recommendations for the Governor, President Pro Tempore of the Senate and the Speaker of the House of Representatives by March 1, 2018. |
| Oklahoma | 2017 | Department of Health | n/a | Oklahoma Opioid Prescribing Guidelines | Guidelines for opioid treatment for acute and chronic pain. Covers topics such as: non-opioids, PDMP checks, lowest effective dose, safe storage and disposal, opioid limits, written treatment plans, informed consent, titration and tapering, etc. |
| Oklahoma | 2017 | SoonerCare (Oklahoma Medicaid) | n/a | n/a | Oklahoma Medicaid updated opioid clinical criteria in their Fee-for-Service program in 2016. (According to a 2016 survey administered by the Henry J Kaiser Family Foundation to the State Medicaid Programs) |
| Oregon | 2017 | Chapter 146 | HB 2114 | Relating to prescription drugs; and prescribing an effective date. | Directs Oregon Medical Board, Oregon State Board of Nursing, Oregon Board of Naturopathic Medicine and Oregon Board of Dentistry to provide licensees of boards with opioid and opiate prescribing guidelines and recommendations established by association of licensee practitioners. |
| Oregon | 2017 | Chapter 409 | HB 3363 | Relating to doctors of osteopathic medicine. | Changes term "osteopath" to "osteopathic physician." Clarifies that doctors of osteopathic medicine practice medicine as physicians. Clarifies that PDMP requirements that apply to physicians also apply to osteopathic physicians. |
| Oregon | 2017 | Chapter 683 | HB 3440 | Relating to drugs; and prescribing an effective date. | In part: Requires Oregon Health Authority to publish and report information related to opioids and opiates. Requires pharmacy to report deidentified information to PDMP upon dispensing prescribed naloxone. Requires pharmacy to report certain other identifying information to PDMP upon dispensing prescribed controlled substance classified in schedules II through IV. Requires information to be disclosed from PDMP to medical director or pharmacy director. Requires information to be disclosed from prescription monitoring program for certain other purposes. Requires licensing information of licensees who are authorized to prescribe or dispense controlled substances to be provided to authority for purpose of qualifying licensees to report information to, or receive information from, PDMP. Specifies that authority may require person requesting deidentified information from PDMP to enter into data use agreement with authority. Requires authority, not less than once per year, to develop, through use of PDMP criteria by which practitioner may be required to receive education or training on prescribing of opioids or opiates. Creates PDMP Prescribing Practices Review Subcommittee for purposes of advising authority on development of criteria, reviewing practitioner's history to determine whether practitioner meets criteria and directing authority to provide educational material to practitioner who meets criteria. Provides that authority may enter into agreements governing sharing and use of information reported to PDMP with regulatory authorities of other states that administer prescription monitoring programs. |
| Oregon | 2017 | Chapter 335 | SB 423 | Relating to physician assistants. | Allows physician assistants to dispense controlled substances in Schedules III and IV under federal Controlled Substances Act. Requires physician assistants to report dispensing of controlled substances to Oregon Health Authority. |
| Oregon | 2017 | Oregon Health Authority, Public Health Division | n/a | Opioid Prescribing Guidelines for Dentists | Recommends: use of the PDMP; not exceeding 3 day or 10 tablet supply; use of certain guidelines; use of combination opioids rather than plain hydrocodone; advising patients of safe storage and disposal; etc. |
| Oregon | 2017 | Oregon Health Authority, Public Health Division | n/a | Oregon Opioid Prescribing Guidelines: Recommendations for the Safe Use of Opioid Medications | Contains recommendations related to: determining when to initiate or continue opioids for chronic pain; opioid selection, dosage, duration, follow-up and discontinuation; assessing risk and addressing harms of opioid use; additional considerations including marijuana and safe storage and disposal. |
| Oregon | 2017 | Oregon Health Authority, Public Health Division | n/a | Oregon Chronic Opioid Prescribing Guidelines (2017-2018) | Recommendations related to: non-opioid alternatives; treatment plan; informed consent; use of immediate-release opioids instead of extended-release/long-acting (ER/LA) opioids; CDC recommendations related to 50 MME/day and 90 MME/day; lowest effective dosage; use of the prescription monitoring program; urine drug testing; avoiding concurrent benzodiazepine prescriptions; safe storage and disposal; etc. |
| Oregon | 2017 | Oregon Health Authority, Public Health Division | n/a | n/a | Oregon Medicaid expressed that they planned to adopt the CDC Guidelines for Prescribing Opioids for Chronic Pain in their Fee-for-Service program in 2017. Further, they planned to require that Managed Care Organizations adopt the guideline. Updates were also made related to opioid quantity limits, prior authorization requirements for opioids, opioid clinical criteria, and opioid step therapy requirements. (According to a 2016 survey administered by the Henry J Kaiser Family Foundation to the State Medicaid Programs) |
| Pennsylvania | 2017 | Act 79 | SB 728 | Achieving Better Care by Monitoring All Prescriptions Program (ABC-MAP) Act | Clarifies that prescribers are exempt from querying the PDMP when prescribing a non-narcotic Schedule V controlled substance for the treatment of epilepsy or a seizure disorder. |
| Pennsylvania | 2017 | Department of Health | n/a | Safe Prescribing of Opioids in Pediatric and Adolescent Populations | Guidelines related to opioids and pediatric populations covering topics such as: only using opioids with moderate to severe pain; preferred opioids for treating children, prohibited opioids in children, dosing, duration of treatment, informed consent, PDMP checks, non-opioid options, etc. |
| Pennsylvania | 2017 | Department of Health | n/a | The Safe Prescribing of Opioids in Orthopedics and Sports Medicine | Guidelines related to opioids in orthopedics and sports medicine covering topics such as: pain assessment, non-opioid options, informed consent, discontinuation of opioid therapy, PDMP checks, opioid limits, etc. |
| Pennsylvania | 2017 | Pennsylvania Medical Assistance (Medicaid) | n/a | n/a | Pennsylvania Medicaid began requiring use of the prescription monitoring program in their Fee-for-Service program in 2017. Further, updates were made related to opioid quantity limits. (According to a 2016 survey administered by the Henry J Kaiser Family Foundation to the State Medicaid Programs) |
| Puerto Rico | 2017 | Law No. 70 | PS 33 | To establish the Prescription Surveillance Law for Controlled Drugs, implement the Drug Recipe Monitoring Program in the Mental Health and Addiction Service Administration, create the Program Advisory Commission; dispose concerning the information of monitoring of prescriptions and the... | n/a (Bill is in Spanish) |
| Rhode Island | 2017 | Chapter 263 | H 5469 | An Act Relating to Food and Drugs - Uniform Controlled Substances Act | Allows information contained in the prescription drug monitoring database to be disclosed to a certified law enforcement drug diversion investigator of a qualified law enforcement agency. |
| Rhode Island | 2017 | Chapter 198 | H 5975 | An Act Relating to Food and Drugs - Uniform Controlled Substances Act - Electronic Prescription of Controlled Substances | Expands the type of pharmaceuticals which may be prescribed using electronic prescriptions and would also provide for protection of patient privacy in regard to electronic prescriptions. |
| Rhode Island | 2017 | Chapter 207 | H 6307 | An Act Relating to Food and Drugs - Uniform Controlled Substances Act | Requires health care professionals upon issuance of initial opioid prescription to discuss with patient/parent/guardian risk of developing dependence/addiction/potential of overdose/death/adverse risks of concurrent use of alcohol/other psychoactive drugs. |
| Rhode Island | 2017 | Chapter 250 | S 493 | An Act Relating to Food and Drugs - Uniform Controlled Substances Act | Requires health care professionals upon issuance of initial opioid prescription to discuss with patient/parent/guardian risk of developing dependence/addiction/potential of overdose/death/adverse risks of concurrent use of alcohol/other psychoactive drugs. |
| Rhode Island | 2017 | Chapter 247 | S 546 | An Act Relating to Food and Drugs - Uniform Controlled Substances Act - Electronic Prescription of Controlled Substances | Amends the statute governing prescriptions of controlled substances by making reference to regulations issued by the department of health. |
| Rhode Island | 2017 | Rhode Island Medicaid | n/a | n/a | Rhode Island Medicaid made updates to opioid quantity limits and opioid clinical criteria in their Fee-for-Service program in 2017. (According to a 2016 survey administered by the Henry J Kaiser Family Foundation to the State Medicaid Programs) |
| South Carolina | 2017 | Act No. 91 | H 3824 | Prescription Drug Monitoring Program | Requires practitioners or their delegates to review the PDMP prior to issuing a prescription for a Schedule II controlled substance, with exceptions. Requires continuing education for optometrists, physician assistants, podiatrists, pharmacists, and dentists of at least two hours every two years related to approved procedures of prescribing and monitoring controlled substances listed in Schedules II, III, and IV. |
| South Carolina | 2017 | Boards of Dentistry, Medical Examiners, Nursing and Pharmacy | n/a | Revised Joint Pain Management Guidelines | Guidelines related to pain management. Disallows the treatment of chronic pain with controlled substances through telemedicine. Requires use of the PDMP prior to initiating new treatment or adjusting current treatment with Schedule II narcotics. Adopts the CDC Guidelines (2016) to the extent the recommendations do not conflict with state law. Discusses non-opioid options, initiating opioid treatment, informed consent, treatment plan, opioid dosage, opioid duration, opioid selection, Naloxone, tapering, special populations, urine drug testing, |
| South Carolina | 2017 | Governor Henry McMaster | n/a | Proclamation of a Statewide Public Health Emergency and Establishment of the Opioid Emergency Response Team | Establishes the Opioid Emergency Response Team to ensure collaboration among government agencies, private entities and associations, and state and local law enforcement authorities in the fight against the opioid crisis. The team is tasked with reviewing relevant resources, drafting an opioid abuse state plan, coordinating state agencies and private stakeholders, identifying funding resources, encourage data sharing, recommending ways to strengthen the PDMP, etc. |
| South Dakota | 2017 | SL 2017, ch 157, § 5. |  | 34-20E-2.1. Prescriber and dispenser registration with program required--Exception. | Any person who has a controlled drug or substance registration to prescribe or dispense any controlled drug or substance must register with the PDMP. Veterinarians are not subject to this requirement. |
| South Dakota | 2017 | SL 2017, ch 158, § 1. |  | 34-20E-21. Report on monitoring and use of prescription opioids. | The board shall, before the fourth Tuesday in January of each year, report to the Senate and House standing committees on health and human services on the monitoring and use of prescription opioids. This report shall include the number of opioid prescriptions from the prior three years. The report shall also include an update to any changes or advances made to the prescription drug monitoring program. (This section is repealed effective June 30, 2022 pursuant to SL 2017, ch 158, § 2.) |
| Tennessee | 2017 | Pub. Ch. 483 | HB 1207 | Controlled Substances - As enacted, requires the department of health to identify high-risk prescribers; etc. | Requires the Department of Health (DOH), beginning July 1, 2017, to identify the prescribers who are in the top 20% of prescribers of opioids in Tennessee in the prior year using data available in the controlled substances database. Requires the DOH to submit the identified prescriber’s name to the staff of the board that issued the prescriber’s license. Requires the board to notify the prescriber of the prescriber’s identification as a high volume prescriber and require the prescriber to meet certain requirements for one year from the point the prescriber was notified of the provider’s identification as a high volume prescriber. States that all costs associated with the proposed legislation will be paid by the identified provider. Allows for a provider to request a contested case hearing if the provider disputes the identification as a high volume prescriber of opioids. |
| Tennessee | 2017 | Pub. Ch. 334 | HB 2561 / SB 523 | Nurses, Nursing - As enacted, changes references to the professional relationship between physicians and advanced practice registered nurses and certified nurse practitioners from "supervisory" to "collaborative". | Modifies the relationship between an advanced practice registered nurse or physician assistant and a physician in regards to reporting certain controlled substances such that the relationship is one based on collaboration rather than supervision. |
| Tennessee | 2017 | Pub. Ch. 210 | SB 154 | Physicians and Surgeons - As enacted, revises certain requirements governing pain management clinics and pain management specialists. | Substitutes existing language that read "pain medicine" with "pain medicine or pain management." Amends qualifications related to who may practice interventional pain management. |
| Tennessee | 2017 | Department of Health | Implementing Public Chapter 1033 (2016) | 1200-34-01 Pain Management Clinics | Emergency rules which repealed the entire existing chapter relating to the certification of pain management clinics and created a new set of rules, as required by Public Chapter 1033. These rules govern the process and requirements involved in applying for the license, as well as direct the Department on requirements to timely inspect the clinic and grant or deny a license. Additionally, these rules: (1) inform medical directors of their responsibilities under the new licensure structure; (2) clearly outline procedures for licensure discipline and how to obtain an order of compliance thereafter; (3) give guidance for inactivation; (4) create a grace period in which a pain clinic can operate in the unplanned absence of the licensed medical director; (5) list acts or conditions that will result in the Commissioner suspending admissions or treatment at a clinic; and (6) list what evidence must be submitted by unlicensed clinics attempting to avoid a presumption they are operating as an unlicensed pain management clinic. |
| Tennessee | 2017 | TennCare (Tennessee Medicaid) | n/a | TennCare will begin implementation of a Morphine Milligram Equivalent (MME) edit. | Effective September 5, 2017, TennCare will begin implementation of a Morphine Milligram Equivalent (MME) edit for all agents in the Short-Acting Narcotic and Long-Acting Narcotic Classes of the PDL. The edit will accumulate MME for all short-acting narcotics and long-acting narcotics a patient is currently receiving and will deny claims for patients prescribed a cumulative daily MME of greater than 200 MME. Prior authorization will be required for patients exceeding the daily MME limit. |
| Tennessee | 2017 | TennCare (Tennessee Medicaid) | n/a | n/a | TennCare expressed that they planned to adopt the CDC Guideline for Prescribing Opioids for Chronic Pain in their Fee-for-Service program in 2017. Updates were made regarding required use of the prescription monitoring program. (According to a 2016 survey administered by the Henry J Kaiser Family Foundation to the State Medicaid Programs) |
| Texas | 2017 |  | HB 2561 | Relating to the continuation and functions of the Texas State Board of Pharmacy and the regulation of certain prescription drugs, prescription drug prescribers and dispensers, and colleges of pharmacy; authorizing a reduction in fees. | The bill would require the Texas State Board of Pharmacy, in consultation with the Optometry Board, Texas Medical Board, Texas State Board of Podiatric Medical Examiners, State Board of Dental Examiners, State Board of Veterinary Medical Examiners, and the Texas Board of Nursing, to determine conduct that constitutes abusive prescribing patterns or practices by applicable licensees. Under the provisions of the bill, TSBP would be permitted to send electronic notification to a dispenser or a prescriber if the information submitted to the Prescription Monitoring Program (PDMP) indicates harmful prescribing patterns. Sets rules related to administrative hearings and judicial proceedings. Specifies that a pharmacist has the exclusive authority to determine whether or not to dispense a drug. |
| Texas | 2017 |  | SB 315 | Relating to the enforcement of subpoenas, the regulation of pain management clinics, and the adoption of guidelines for prescribing certain opioids by the Texas Medical Board. | The legislature finds that deaths resulting from the use of opioids and other controlled substances constitute a public health crisis and that there is a compelling state interest in the board closely regulating the prescribing of opioids and other controlled substances by physicians and their delegates. Accordingly, the legislature finds that inspections and investigations conducted by the board, including the board's use of subpoenas for immediate production, inspection, and copying of medical and billing records, are necessary to adequately regulate the prescribing of opioids and other controlled substances in order to protect the public health and welfare. Outlines grounds under which pain management clinics may be inspected. |
| Texas | 2017 | Texas Medicaid | n/a | n/a | Texas Medicaid updated opioid quantity limits, prior authorization for opioids, and opioid clinical criteria in their Fee-for-Service program in 2017. (According to a 2016 survey administered by the Henry J Kaiser Family Foundation to the State Medicaid Programs) |
| Utah | 2017 | Session Law Chapter 237 | HB 50 | Opioid Prescribing Regulations | A prescription for a Schedule II or III opioid that is issued for an acute condition shall be completely or partially filled in a quantity not to exceed a 7-day supply as directed on the daily dosage rate of the prescription, with exceptions. A prescriber shall check the PDMP for information about a patient before the first time the prescriber gives a prescription to a patient for a Schedule II or III opioid, with exceptions. If a prescriber is repeatedly prescribing a Schedule II or III opioid to a patient, the prescriber shall periodically review either PDMP information or other similar records of controlled substances the patient has filled. The PDMP must review and adjust the database programming which automatically logs off an individual accessing the database to maximize patient privacy and reduce inappropriate access. The PDMP must make the database more useful and helpful to prescribers of controlled substances and their delegates authorized to access the system, especially in high usage locations such as the emergency department. |
| Utah | 2017 | Session Law Chapter 53 | HB 90 | Insurance Opioid Regulation | This bill authorizes commercial insurers, the state Medicaid program, workers' compensation insurers, and public employee insurers to implement policies to minimize the risk of prescribing opioids. |
| Utah | 2017 | Session Law Chapter 66 | HB 146 | Partial Filling of a Schedule II Controlled Substance Prescription | Allows a prescription for a Schedule II controlled substance to be partially filled in accordance with federal law for a patient in a long-term care facility or a patient with a terminal illness. However, in the case of all other patients, a prescription for a Schedule II controlled substance may only be partially filled if in accordance with federal law and in accordance with state rules that will specify how to record the date, quantity supplied, and quantity remaining of a partially filled prescription, as well as anything else “otherwise necessary for the implementation” of this statute. |
| Utah | 2017 | Session Law Chapter 180 | HB 175 | Opioid Abuse Prevention and Treatment Amendments | Requires controlled substance prescribers to receive training in a nationally recognized opioid abuse screening method, SBIRT. Permits controlled substance prescribers to fulfill continuing education requirements through training in the screening method and permits controlled substance prescribers who receive a DATA 2000 waiver to use the waiver to fulfill certain continuing education requirements. Requires Medicaid reimbursement to health care providers for screening services and requires the Public Employees' Benefit and Insurance Program to reimburse health care providers for screening services. |
| Utah | 2017 | Session Law Chapter 309 | SB 162 | Physician Assistant Amendments | Amends the requirements of a delegation of services agreement and removes the requirement that a physician assistant obtain a co-signature from the supervising physician to prescribe certain controlled substances. |
| Utah | 2017 | Session Law Chapter 228 | SB 258 | Addiction Recovery Amendments | Directs the creation of scientifically based guidelines for controlled substance prescribers to co-prescribe an opiate antagonist to a patient. The department shall report to the Health and Human Services Interim Committee before October 30, 2017, regarding such established guidelines. The report shall include: (1) Established rules regarding the co-prescription of an opiate antagonist to a patient; and (2) An analysis of the application of the rules and the impact of the rules. |
| Utah | 2017 | Division of Occupational and Professional Licensing | Implementing HB 175 (2017) | Rule R156-37 Utah Controlled Substances Act Rule | A new Subsection R156-37-102(5) is added to define "SBIRT training" in reference to the definition of "SBIRT" in Section 58-37-6.5, the "Screening, Brief Intervention, and Referral to Treatment approach used by the federal Substance Abuse and Mental Health Services Administration." This proposed amendment is made because Subsection 58-37-6.5(1)(e), enacted by H.B. 175 (2017), allows the Division to either promulgate a definition of "SBIRT" by rule, or to use the federal Substance Abuse and Mental Health Services Administration (SAMHSA) definition. By incorporating the federal SAMHSA definition, the Division is choosing it for the SBIRT training requirements. Section R156-37-402 is amended to refer to the new SBIRT training requirements enacted in Subsection 58-67-6.5(2)(b), and provides that the approved SBIRT training satisfies the Division's continuing education requirements for license renewal. |
| Utah | 2017 | Utah Medicaid | n/a | n/a | Utah Medicaid updated the opioid quantity limits, prior authorization requirements for opioids, and opioid step therapy requirements for their Fee-for-Service program in 2017. (According to a 2016 survey administered by the Henry J Kaiser Family Foundation to the State Medicaid Programs) |
| Vermont | 2017 | Department of Health | Implementing Act 173 (2016) | Vermont Prescription Monitoring System Rule | The use of VPMS in treating patients in hospice care, and other end-of-life care is not required. In the event of electronic or technological failure, the requirements for registering with, uploading to and querying the VPMS are waived. |
| Vermont | 2017 | Department of Health | n/a | Rule Governing the Prescribing of Opioids for Pain | Provides legal requirements for the appropriate use of opioids in treating pain. The prescription limits for acute pain only apply to the first prescription written for a given course of treatment, and do not apply to renewals or refills. This rule only applies to Schedule II, III, or IV Controlled Substances. Requires: consideration of the use of non-opioids and non-pharmacological treatments; documentation; use of the PDMP; patient education; informed consent; consultation or referral to a pain specialist at certain times during treatment; co-prescriptions of naloxone for certain patients. Establishes various--extremely specific and detailed--limits for opioids when used to treat minor pain, moderate pain, severe pain, and extreme pain. |
| Vermont | 2017 | Vermont Medicaid | n/a | n/a | Vermont Medicaid updated the opioid quantity limits for their Fee-for-Service program in 2017. (According to a 2016 survey administered by the Henry J Kaiser Family Foundation to the State Medicaid Programs) |
| Virginia | 2017 | Chapter 110 | HB 1767 / SB 1009 | Telemedicine, practice of; prescribing controlled substances. | Provides that a health care practitioner who performs or has performed an appropriate examination of the patient, either physically or by the use of instrumentation and diagnostic equipment, for the purpose of establishing a bona fide practitioner-patient relationship may prescribe Schedule II through VI controlled substances to the patient, provided that the prescribing of such controlled substance is in compliance with federal requirements for the practice of telemedicine. The bill also authorizes the Board of Pharmacy to register an entity at which a patient is treated by the use of instrumentation and diagnostic equipment for the purpose of establishing a bona fide practitioner-patient relationship and is prescribed Schedule II through VI controlled substances to possess and administer Schedule II through VI controlled substances when such prescribing is in compliance with federal requirements for the practice of telemedicine and the patient is not in the physical presence of a practitioner registered with the U.S. Drug Enforcement Administration. |
| Virginia | 2017 | Chapter 249 | HB 1885 / SB 1232 | Limits on prescription of controlled substances containing opioids. | Requires a prescriber registered with the Prescription Monitoring Program (the Program) to request information about a patient from the Program upon initiating a new course of treatment that includes the prescribing of opioids anticipated, at the onset of treatment, to last more than seven consecutive days and exempts the prescriber from this requirement if the opioid is prescribed as part of treatment for a surgical or invasive procedure and such prescription is for no more than 14 consecutive days. Current law requires a registered prescriber to request information about a patient from the Program upon initiating a new course of treatment that includes the prescribing of opioids anticipated, at the onset of treatment, to last more than 14 consecutive days and exempts the prescriber from this requirement if the opioid is prescribed as part of a course of treatment for a surgical or invasive procedure and such prescription is not refillable. The bill extends the sunset for this requirement from July 1, 2019, to July 1, 2022. |
| Virginia | 2017 | Chapter 114 | HB 2046 | Prescription drug orders; information on proper disposal. | Requires the Board of Pharmacy to develop guidelines for the provision of counseling and information regarding proper disposal of unused dispensed drugs, including information about pharmacy drug disposal programs in which the pharmacy may participate, by pharmacists to patients for whom a prescription is dispensed. |
| Virginia | 2017 | Chapter 180 | HB 2161 / SB 1179 | Opioids; workgroup to establish guidelines for prescribing. | Requires the Secretary of Health and Human Resources to convene a workgroup that shall include representatives of the Departments of Behavioral Health and Developmental Services, Health, and Health Professions as well as representatives of the State Council of Higher Education for Virginia and each of the Commonwealth's medical schools, dental schools, schools of pharmacy, physician assistant education programs, and nursing education programs to develop educational standards and curricula for training health care providers, including physicians, dentists, optometrists, pharmacists, physician assistants, and nurses, in the safe and appropriate use of opioids to treat pain while minimizing the risk of addiction and substance abuse. The workgroup shall report its progress and the outcomes of its activities to the Governor and the General Assembly by December 1, 2017. |
| Virginia | 2017 | Chapter 181 | HB 2164 | Drugs of concern; drug of concern. | Adds gabapentin to the list of "drug of concern" which must be reported to the PDMP. |
| Virginia | 2017 | Chapter 115 | HB 2165 / SB 1230 | Opiate prescriptions; electronic prescriptions. | Requires a prescription for any controlled substance containing an opiate to be issued as an electronic prescription and prohibits a pharmacist from dispensing a controlled substance that contains an opiate unless the prescription is issued as an electronic prescription, beginning July 1, 2020. The bill requires the Secretary of Health and Human Resources to convene a work group to review actions necessary for the implementation of the bill's provisions and to evaluate hardships on prescribers and the inability of prescribers to comply with the deadline for electronic prescribing and to make recommendations for any extension or exemption processes relative to compliance or disruptions due to natural or manmade disasters or technology gaps, failures, or interruptions of service. The bill requires the work group to report on its progress to the Chairmen of the House Committee on Health, Welfare and Institutions and the Senate Committee on Education and Health by November 1, 2017, and to issue a final report to such Chairmen by November 1, 2018. |
| Virginia | 2017 | Chapter 291 | HB 2167 / SB 1180 | Opioids and buprenorphine; Boards of Dentistry and Medicine to adopt regulations for prescribing. | Directs the Boards of Dentistry and Medicine to adopt regulations for the prescribing of opioids and products containing buprenorphine. The bill requires the Prescription Monitoring Program at the Department of Health Professions to provide an annual report to the Joint Commission on Health Care on the prescribing of opioids and benzodiazepines in the Commonwealth. |
| Virginia | 2017 | Chapter 186 | SB 1484 | Prescription Monitoring Program; disclosure of information to certain physicians or pharmacists. | Provides that the information in the possession of the Prescription Monitoring Program disclosed by the Director of Health Professions about a specific recipient who is a member of a Virginia Medicaid managed care program to a physician or pharmacist employed by the Virginia Medicaid managed care program may be disclosed to such physician's or pharmacist's clinical designee who holds a multistate licensure privilege to practice nursing or a license issued by a health regulatory board within the Department of Health Professions and is employed by the Virginia Medicaid managed care program. |
| Virginia | 2017 | Department of Health Professions | Implementing Chapter 249 (2017) | Regulations Governing Prescribing of Opioids and Buprenorphine | Establishes rules related to opioids for acute pain (7 day initial supply or less, 14 days total, short acting only), chronic pain (informed consent, safe disposal, naloxone, opioid limits, urine drug screens), documentation, consultation and referral, treatment agreements and treatment plans, etc. |
| Virginia | 2017 | Virginia Department of Medical Assistance Services (Medicaid) | n/a | n/a | Virginia Medicaid made updates related to opioid quantity limits, prior authorization for opioids, opioid clinical criteria, and opioid step therapy requirements in their Fee-for-Service program. (According to a survey administered by the Henry J Kaiser Family Foundation to the State Medicaid Programs) |
| Virginia | 2017 | Governor Ralph S. Northam, Executive Order 21 | n/a | Establishing the Governor's Advisory Commission on Opioids and Addiction | Governor Northam issued an executive order creating the Advisory Commission on Opioids and Addiction to provide comments to the co-chairs of the Governor’s Executive Leadership Team on Opioids and Addiction. The Commission is tasked with addressing specific prevention and treatment issues including limiting availability of prescription opioids for misuse. |
| Washington | 2017 | Chapter 297 | HB 1427 | Concerning opioid treatment programs. | Requires the licensing boards (of various prescribing professions) to adopt rules by 2019 establishing requirements for prescribing opioid drugs. Allows PDMP personnel to assess prescribing practices and provide quality improvement feedback to providers, including comparison of their respective data to aggregate data for providers with the same type of license and same specialty. |
| Washington | 2017 | Chapter 212 | SB 5035 | Concerning patients' access to investigational medical products. | An eligible patient and his or her treating physician may request that a manufacturer make an investigational product available for treatment of the patient. The request must include a copy of the written informed consent form described in section 5 of this act and an explanation of why the treating physician believes the investigational product may help the patient. |
| Washington | 2017 | Washington State Health Care Authority (Medicaid, Public Employees) | n/a | HCA to implement opioid clinical policy for Apple Health (Medicaid) on Nov. 1 | Limits the quantity of opioids that can be prescribed to opiate naïve patients for noncancer pain. The limits for new opioid prescriptions will be: No more than 18 doses (approximately a 3-day supply) for patients age 20 or younger; and, No more than 42 doses (approximately a 7-day supply) for patients age 21 or older. Prescribers can override these limits if they feel it is medically necessary, by typing “Exempt” in the text of the prescription. At the point of transition from acute to chronic opioid treatment, defined as six weeks of therapy, the policy requires prescribers to attest they are following best practices for opioid prescribing. Pharmacies should not turn away patients with prescriptions above the quantity limits. Prescriptions that reject for being over the allowed limit for acute use, can be dispensed as a partial fill up to that limit. Alternatively, pharmacies can call prescribers to see if an exemption or other override is appropriate. Long-acting opioids are only approved when one of these situations exists: The patient is grandfathered (already on chronic opioids before November 1, 2017); The patient is undergoing active cancer treatment; The patient is in hospice, palliative care, or end-of-life care; Prescriber has followed the EXEMPT process; Prescriber has obtained prior authorization following 42 days of therapy. |
| Washington | 2017 | Agency Medical Directors' Group, Dr. Robert Bree Collaborative | n/a | Dental Guideline on Prescribing Opioids for Acute Pain Management | Issues clinical recommendations/best practices re: patient evaluation, PDMP checks, non-opioids as first line treatments, informed consent, opioid limits. |
| Washington | 2017 | Washington State Health Care Authority (Medicaid, Public Employees) | n/a | n/a | Washington Medicaid expressed that they planned to adopt the CDC Guideline for Prescribing Opioids for Chronic Pain in their Fee-for-Service program in 2017. Further, they planned to require that Managed Care Organizations adopt the guideline. Updates were also made to prior authorization for opioids and opioid clinical criteria. (According to a 2016 survey administered by the Henry J Kaiser Family Foundation to the State Medicaid Programs) |
| West Virginia | 2017 | Chapter 173 | HB 2509 | Relating to the Practice of Telemedicine | Preexisting law disallows a physician who practices medicine to a patient solely through the utilization of telemedicine from prescribing a Schedule II controlled substance to a patient. This bill extends the prohibition to include all narcotics in Schedules II through V. |
| West Virginia | 2017 | Chapter 188 | HB 2620 | West Virginia Drug Overdose Monitoring Act | Relating to the collection of data pertaining to the prosecutions and overdoses of controlled substances; establishing an office of drug control policy capable of receiving and sharing law enforcement information; establishing a reporting program for collection of criminal statistics; setting forth legislative purpose for collection of data; requiring the prosecuting attorney for each county to compile data relating to the criminal matters involving a violation of the uniform controlled substances act; requiring that certain personally identifiable information about a specific defendant not be reported; establishing a reporting program for collection of data on overdoses; establishing a reporting program for collection of fatal and nonfatal overdoses in the state; directing the office of drug control policy establish a central repository for collection of data; directing the office to consult with affected entities in implementing the data collection program and providing for rule-making authority. |
| West Virginia | 2017 | Chapter 43 | SB 333 | Requiring all DHHR-licensed facilities access WV Controlled Substances Monitoring Program Database | Requiring reporting instances of an overdose or a suspected overdose to the PDMP; allowing access to the database to deans of the state’s medical schools or their designees for monitoring prescribing practices of prescribing faculty and residents; allowing access to designated physician reviewers for medical provider employers and hospital chief medical officers; allowing the Board of Pharmacy to require that drugs of concern be reported to the database; exempting reporting requirements for drugs of concern from criminal penalties; allowing agents for the Office of Health Facility Licensure and Certification to access the database; allowing the Board of Pharmacy to develop administrative penalties for not reporting drugs of concern; providing for rulemaking; requiring the licensing boards to report to the Board of Pharmacy when notified of unusual prescribing habits of a licensee; and making technical corrections. |
| West Virginia | 2017 | Chapter 193 | SB 339 | Creating Legislative Coalition on Chronic Pain Management | Creates the Coalition for Responsible Chronic Pain Management. Sets minimum requirements for the coalition, including, but not limited to: (1) Undertaking a review of chronic pain regulations any legislative rules to ascertain if a less cumbersome, but equally or more effective manner exists to provide necessary regulation of prescriber practices characterized as pain clinics; (2) Reviewing the statutory provisions of the Controlled Substance Monitoring Database to ascertain if there is a more effective manner for prescribers to access the database which would provide sufficient regulation over the prescription of chronic pain medication, while still allowing access to patients with established chronic pain conditions; and (3) Provide guidance to the Legislature on potential statutory solutions relative to regulation of chronic pain medications. |
| West Virginia | 2017 | West Virginia Medicaid | n/a | Chronic Opioid Prior Authorization Form | To request prior authorization for opioids under Medicaid, a practitioner must fill out a form that requests information on the patient's allergies, renal hepatic function, height, weight, blood pressure, heart rate, respiratory rate, laboratory findings, radiological findings, daily function, screening for substance use disorder, signed treatment agreement, storage and disposal education, naloxone prescription if above 50 MME/day, PDMP report, and urine drug screening results. |
| West Virginia | 2017 | West Virginia Medicaid | n/a | n/a | West Virginia Medicaid made updates to opioid quantity limits, prior authorization for opioids, opioid clinical criteria, and opioid step therapy requirements in their Fee-for-Service program in 2017. (According to a 2016 survey administered by the Henry J Kaiser Family Foundation to the State Medicaid Programs) |
| Wisconsin | 2017 | Dentistry Examining Board | Implementing Act 269 (2015) | Best Practices for Prescribing Controlled Substances Guidelines | Guidelines intended to supplement and not replace the individual dentist’s professional judgment. Dentists should establish a diagnosis and legitimate dental purpose appropriate for controlled substance therapy, through a history, physical exam, laboratory, imaging or other studies. They should assess risk, assess pain, review the PDMP, collaborate with other providers, and definitively treat the underlying dental need. They should maximize non-opioid therapies, follow an established Controlled Substances Office Policy, start low and go slow, educate the patient, and follow up. |
| Wisconsin | 2017 | Wisconsin Medicaid | n/a | n/a | Wisconsin Medicaid began requiring use of the PDMP in their Fee-for-Service program in 2017. Further, they updated their requirements related to opioid quantity limits and prior authorization for opioids. (According to a 2016 survey administered by the Henry J Kaiser Family Foundation to the State Medicaid Programs) |
| Wyoming | 2017 | Department of Workforce Services, Division of Workers' Compensation | n/a | Treatment Guidelines - Chronic Non-Malignant Pain | The Division has approved Oxycodone/APAP, Hydrocodone/APAP, Butrans patch, Oxycodone APAP, OxyContin, Morphine, Oxymorphone, Kadian, and the analgesic Tramadol for the treatment of chronic pain. All transmucosal and transdermal immediate release Duragesic (fentanyl) agents, Suboxone/Subutex, and Demerol will be denied for chronic nonmalignant pain relief. Transcutaneous opioid analgesics will be considered only if there is documentation that the disorder prevents adequate oral dosing. After the initial review, the Nurse Case Manager (NCM) can recommend coverage approval for up to one year with a yearly urine drug screen. If the urine drug screen is inconsistent, the NCM will request on-going monitoring and will monitor compliance for the next year. Requires a written treatment plan; informed consent; regular follow-up; signed treatment agreement, and urine drug testing. Recommends consulting with a pain specialist if a dose is in excess of 120 MME/day, for patients who have not improved after 6 months, for those with a history of chemical dependency, etc. |
| Wyoming | 2017 | Wyoming Medicaid | n/a | n/a | Wyoming Medicaid made updates to opioid quantity limits in their Fee-for-Service program in 2017. |
| United States | 2018 | Public Law 115-271 | HR 6 | SUPPORT for Patients and Communities Act | Allows the Centers for Disease Control and Prevention (CDC) to provide technical assistance and award grants to improve Prescription Drug Monitoring Programs, promote new approaches for responding to emerging public health crises, and improve overdose data reporting. Alters PDMP requirements, including the authorization of federal support for specific PDMP improvements regarding use, data reporting, and intrastate and interstate interoperability. Requires the U.S. Department of Health and Human Services (HHS) to establish a demonstration program through which hospitals and emergency departments receive grants to support alternative pain-management protocols and treatments that limit the use and prescription of opioids in emergency departments. Requires the Food and Drug Administration (FDA) to develop guidance regarding alternative methods for collecting data on opioid sparing (i.e., the use of drugs that reduce pain while also allowing reduced use or avoidance of oral opioids) and using such information in product labels. Requires HHS to develop best practices for health care providers and state agencies regarding the display of a patient's history of opioid addiction in the patient's medical records. Requires the Centers for Medicare & Medicaid Services (CMS) and the Health Resources and Services Administration (HRSA) to annually notify health care providers about health information that may be disclosed under federal privacy laws to families, caregivers, and health care providers during emergencies, including overdoses. |
| United States | 2018 | President of the United States | n/a | President Donald J. Trump’s Initiative to Stop Opioid Abuse and Reduce Drug Supply and Demand | The President’s Opioid Initiative will: Reduce drug demand through education, awareness, and preventing over-prescription. Cut off the flow of illicit drugs across our borders and within communities. Save lives now by expanding opportunities for proven treatments for opioid and other drug addictions. |
| United States | 2018 | Food and Drug Administration | n/a | FDA Education Blueprint for Health Care Providers Involved in the Treatment and Monitoring of Patients with Pain | Revised FDA REMS related to opioids. Issued a number of updated/new strategies, including modifications to REMS programs that require, for example: training on non-opioid pain alternatives; training for prescribing related to immediate-release formulations of opioid drugs; and, broader training that covers more health care providers who help manage patients with pain. Additionally, there is a plan to leverage nutrition and diet as ways to reduce morbidity and mortality from disease; we have identified dietary factors as one contributor to patients’ pain experience. |
| Alabama | 2018 | Board of Dental Examiners of Alabama | n/a | Administrative Rule 270-X-2-.23 Risk and Abuse Mitigation Strategies by Prescribing Dentists | Requires dentists to utilize the state’s PDMP and use risk and mitigation strategies. A violation of the rule is subject to discipline, and dentists are required to document the use of risk and mitigation strategies under the following circumstances: • The continuation of controlled substance therapy greater than seven days for any patient. • Prior to prescribing any controlled substance of more than 50 MME/day. • For any patient that is prescribed three or more acute pain medicine prescriptions by the dentist in any 90-day period. • For any patient who gives a history of chronic pain medicines and/or benzodiazepines, so that the dentist may coordinate therapy with the patient’s other prescribing medical providers and verify the specifics of the chronic medications. Due to the heightened risk of adverse events associated with the concurrent use of opioids and benzodiazepines, dentists should consider alternative forms of treatment. |
| Alabama | 2018 | Alabama Board of Medical Examiners & Medical Licensure Commission of Alabama | n/a | Controlled substances prescribing CME | All Alabama Controlled Substance Certificate holders must obtain two (2) AMA PRA Category 1 or equivalent credits every two (2) years beginning in 2018. Acceptable programs confer Category 1 Credit in the areas of: (1) controlled substance prescribing practices, (2) recognizing signs of the abuse or misuse of controlled substances, or (3) controlled substance prescribing for chronic pain management. This is required of all Alabama Controlled Substances Certificate registrants every two years. No pre-approval of the courses is required. |
| Alaska | 2018 | Board of Dental Examiners | n/a | Board of Dental Examiners regulations re: Continuing Education, License Requirements, Registration | Requires dentists who hold an active Drug Enforcement Agency (DEA) registration number to register with the state’s PDMP and complete at least two hours of continuing education in pain management and opioid use and addiction. |
| Arizona | 2018 | Chapter 233 | HB 2250 | Physician assistants; prescribing authority; delegation | Allows a physician assistant to prescribe and/or refill a prescription for a schedule II or III drug that is not an opioid or benzodiazepine without the written consent of a supervising physician. |
| Arizona | 2018 | Chapter 243 | HB 2549 | Controlled substances; dosage limit | Makes it unprofessional conduct for a physician to dispense a Schedule II controlled substance that is an opioid. Disallows naturopathic doctors from dispensing Schedule II opioids. Clarifies that the 90 MME/day opioid limit does not apply to patients being treated inside a health care institution, nor does the limit apply for 14 days following a surgical procedure. For cases in which the physician believes more than 90 MME/day of opioid is needed, this bill adds (in addition to consultation with a board certified pain specialist) an option for the physician to consult with an opioid assistance referral call service. Permits the Arizona Poison Control System to provide opioid assistance and referral call services. Updates pain management clinic rules to specify that clinics must register within 60 days of meeting the definition of a pain management clinic. Allows a registered nurse practitioner who has advanced pain certification to serve as the medical director of a pain management clinic. |
| Arizona | 2018 | Chapter 87 | HB 2633 | Pharmacists; controlled substances | An initial prescription for a Schedule II controlled substance that is an opioid that is written for more than a five day supply or for more than 90 MME/day is deemed to meet the exemption requirements. A pharmacist is not required to verify with the prescriber whether the initial prescription complies with the exemption requirements. |
| Arizona | 2018 | Chapter 1, First Special Session | SB 1001 / HB 2001 | Controlled substances; regulation; appropriation. | Establishes requirements and prohibitions for prescribing, administering and dispensing schedule II controlled substances for pain management. Creates the Substance Abuse Disorder Services Fund (Fund), administered by the Arizona Health Care Cost Containment System (AHCCCS), and appropriates $10,000,000 General Fund monies to the Fund in FY 2019. Establishes that the State Board of Optometry may censure, impose a civil penalty, prescribe probation, suspend, revoke or refuse to renew or issue the license, certificate or registration of an optometrist who dispenses a schedule II controlled substance for pain management. Specifies that an optometrist may prescribe or administer a controlled substance only if it is an analgesic that was reclassified from schedule III to schedule II after January 1, 2014. Directs the Board of Nursing to adopt rules that prohibit registered nurse practitioners from dispensing schedule II controlled substances for pain management, but that permit registered nurse practitioners to prescribe schedule II controlled substances for MAT. Limits an initial prescription for a schedule II controlled substance for pain management to a 5-day supply and permits a 14-day supply for initial prescriptions following a surgical procedure, with exceptions. Prohibits a health professional who is authorized to prescribe controlled substances from issuing a new prescription order for a schedule II controlled substance for pain management that exceeds 90 MMEs, with exceptions. Directs a health professional who believes a patient requires more than 90 MMEs per day to consult with a board-certified pain specialist. Requires that a health professional additionally prescribe naloxone hydrochloride, or another opioid antagonist, to a patient who is prescribed more than 90 MMEs per day. Requires that a non-emergency prescription order for a schedule II drug dispensed directly by a pharmacist must have a red cap and warning label. Requires an electronic prescription to a pharmacy for a schedule II drug for pain management in Maricopa, Pima, Pinal, Yavapai, Mohave and Yuma counties beginning January 1, 2019. Requires an electronic prescription to a pharmacy for a schedule II drug for pain management in Greenlee, La Paz, Graham, Santa Cruz, Gila, Apache, Navajo, Cochise and Coconino counties beginning July 1, 2019. Requires the Board of Pharmacy to adopt rules to establish a waiver process for electronic prescription requirements for smaller counties. Requires a health care services plan to honor a granted prior authorization request related to a chronic pain condition for six months after the request approval date or the last day of the enrollee's insurance coverage, whichever is earliest. Excludes the following from prior authorization request requirements for a chronic pain condition: prescription medications that the FDA recommends be used for a period of less than six months; and, any opioid, benzodiazepine, schedule I or schedule II controlled substance. Requires pharmacists to check the CSPDMP before dispensing a schedule II drug or benzodiazepine. And more. |
| Arizona | 2018 | Chapter 101 | SB 1111 | Workers' compensation; opioids; dispensed medications | Requires physicians to report all Schedule II controlled substances and all opioid medications to the PDMP. Requires specific documentation in the medical record, including risk assessment and informed consent. Requires the treatment plan discuss the frequency of face-to-face follow-up visits to reevaluate the employee's continued use of opioids, and further, include the criteria and procedures for tapering and discontinuing opioid use. Requires PDMP use prior to prescribing an opioid or benzodiazepine. |
| Arizona | 2018 | Arizona Department of Health Services | n/a | Arizona Opioid Prescribing Guidelines | The Arizona Opioid Prescribing Guidelines are a voluntary, consensus set of guidelines that promote best practices for prescribing opioids for acute and chronic pain. They are intended to reduce the inappropriate use of controlled substances, improve safety, and reduce harm while preserving the vital roles of clinicians and patients in the management of acute and chronic pain. They are intended for use by clinicians in primary care and specialty outpatient settings who manage acute and chronic pain that is not occurring at the end of life and not due to malignancy. |
| Arkansas | 2018 | Arkansas State Board of Dental Examiners | n/a | Mandate Prescribers to check the Prescription Monitoring Program | Requires dentists who prescribe to register with the PDMP and access patient information before writing a prescription for an opioid. Provides that failure to access the PDMP is subject to disciplinary action. Limits prescriptions for Schedule II or III opiates to the total maximum manufacturer’s recommended daily dose for a total of 7 days administration. Obtain a minimum of three hours of prescribing education approved by the board that includes specified topics by Dec. 31, 2019, within the first two years of being granted a license in the state. Document patient records for any need of re-dosing. |
| Arkansas | 2018 | Arkansas State Medical Board | n/a | Regulation No. 2 | Requires documented medical justification for "excessive" opioid prescriptions that exceed 50 MME/day. Requires use of PDMP, informed consent, urine drug testing, pain treatment agreements, etc. |
| California | 2018 | Chapter 478 | AB 1751 | Controlled substances: CURES database. | Requires the department, no later than July 1, 2020, to adopt regulations regarding the access and use of the information within CURES by consulting with stakeholders, and addressing certain processes, purposes, and conditions in the regulations. The bill would authorize the department, once final regulations have been issued, to enter into an agreement with any entity operating an interstate data sharing hub, or any agency operating a prescription drug monitoring program in another state, for purposes of interstate data sharing of prescription drug monitoring program information. Requires any agreement entered into by the department for those purposes to ensure that all access to data obtained from CURES and the handling of data contained within CURES comply with California law and meet the same patient privacy, audit, and data security standards employed and required for direct access to CURES. |
| California | 2018 | Chapter 479 | AB 1753 | Controlled substances: CURES database. | Requires prescription forms for controlled substance prescriptions to have a uniquely serialized number, in a manner prescribed by the department, and would require a printer to submit specified information to the department for all prescription forms delivered. The bill would require the information submitted by a dispensing pharmacy, clinic, or other dispenser to the department to include the serial number for the corresponding prescription form. |
| California | 2018 | Chapter 274 | AB 2086 | Controlled substances: CURES database. | Allows prescribers to access the CURES database for a list of patients for whom that prescriber is listed as a prescriber in the CURES database. |
| California | 2018 | Chapter 589 | AB 2783 | Controlled substances: hydrocodone combination products: schedules. | Reclassifies specified hydrocodone combination products as Schedule II controlled substances. By expanding the scope of the existing crimes that apply to Schedule II controlled substances, this bill would impose a state-mandated local program. |
| California | 2018 | Chapter 693 | SB 1109 | Controlled substances: Schedule II drugs: opioids. | Requires all prescribers to receive continuing education related to Schedule II drugs. |
| Colorado | 2018 |  | HB 1003 | Opioid Misuse Prevention | Establishes the opioid and other substance use disorders study committee. Directs the Center for Research into Substance Use Disorder Prevention, Treatment, and Recovery to develop and implement continuing medical education activities to help prescribers of pain medication to safely and effectively manage patients with chronic pain, and when appropriate, prescribe opioids. Provides appropriations. |
| Colorado | 2018 |  | SB 22 | Clinical Practice For Opioid Prescribing | Restricts the number of opioid pills that a health care practitioner, including physicians, physician assistants, advanced practice nurses, dentists, optometrists, podiatrists, and veterinarians, may prescribe for an initial prescription to a seven-day supply and allows each health care practitioner to exercise discretion to include a second fill for a seven-day supply, with exceptions. Requires prescribers to indicate his or her specialty or area of practice upon their initial query to the PDMP. By September 1, 2019, the Department of Public Health and Environment is required to report its findings to the General Assembly from studies conducted on PDMP integration methods and health care provider report cards. The department is also required to provide the findings to the Center for Research Into Substance Use Disorder Prevention, Treatment, and Recovery Support Strategies at the University of Colorado Health Sciences Center. The center is required to use the information to provide voluntary training for health care providers in targeted areas. |
| Colorado | 2018 | Health First Colorado (Medicaid), Department of Health Care Policy and Financing | n/a | Health First Colorado Benefits & Services | Beginning November 15, 2018, the total daily limit of MME will be decreasing from 250 MME per day, to 200 MME per day. If a prescription puts a member above 200 MME per day, further approvals will be required to allow time for the prescriber to work with the member to safely taper opioid doses down to 200 MME, while making sure the member has adequate pain control. In some circumstances, a consultation with the Department’s pain management physician may be required. In dental settings, the opioid policy will allow members to receive three, four-day prescription fills and a fourth refill request will require further approvals. In each fill, the quantity limit for dental opioids will be 24 pills. Members undergoing more complex dental procedures such as major orofacial surgery, may be approved for up to a seven-day supply and up to 56 pills per fill. |
| Connecticut | 2018 | Public Act 18-100 | HB 5241 | An Act Concerning Pharmacist And Practitioner Compliance Rates And The Electronic Prescription Drug Monitoring Program. | Requires the public health and consumer protection commissioners to review pharmacists' and prescribing practitioners' compliance with the PDMP requirements. By January 1, 2019, the commissioners must submit a joint report to the General Law and Public Health committees with their shared recommendations for increasing compliance rates. By law, (1) prescribers or their designees must consult the PDMP database before issuing certain prescriptions for controlled substances and (2) pharmacists and dispensing practitioners must submit data to the PDMP database promptly after dispensing controlled substance prescriptions. |
| Delaware | 2018 | Volume Chapter 81:429 | SB 206 | An Act To Amend Title 16 Of The Delaware Code Relating To The Prescription Monitoring Program. | Addresses the individuals in Delaware that suffered a non-fatal overdose in 2017, but continued to be prescribed opioid pain medications or did not receive substance use disorder treatment. This Act links specific patient care data related to overdose collected by the Office of Emergency Medical Services or the Office of the State Epidemiologist with data in the Delaware Prescription Monitoring Program (“PDMP”). Fosters best practices in the use of health information, to ensure that consistent, humane, evidence-based treatment and care is available and provided to those suffering from substance use disorder or non-fatal overdose. Linking this data may assist prescribers and pharmacists in the identification of substance use disorder and promote safer prescribing. This Act also provides prescriber and dispenser identified data to the PDMP Advisory Committee and the Addiction Action Committee, which will enable these committees to do the following: 1. Appropriately identify prescribing and dispensing patterns of concern. 2. Make recommendations to the PDMP administrator. 3. Provide targeted education to those individuals whose prescribing or dispensing practices are outliers from the Delaware average. This Act also makes technical corrections to conform existing law to the standards of the Delaware Legislative Drafting Manual. |
| Delaware | 2018 | Volume Chapter 81:430 | SB 225 | An Act To Amend Title 16, Title 24, Title 29, And Title 31 Of The Delaware Code Relating To Insurance Coverage For The Treatment Of Back Pain. | Encourages prescribers and patients to use proven non-opioid methods of treating back pain by doing the following: 1. Prohibits numerical limits on physical therapy and chiropractic care, which might deter prescribers or patients from using those treatments rather than opioids. 2. Adds continuing education requirements for prescribers relating to risks of opioids and alternatives to opioids. 3. Creates a pilot program within the state employee health care plan that allows the use of massage therapy, acupuncture, and yoga for the treatment of back pain. |
| District of Columbia | 2018 | Department of Health | n/a | Chapter 100, Collaborative Practice Agreements Between Physicians and Pharmacists | Sets forth requirements related to collaborative practice agreements, including related to prescriptions/drug therapy management. |
| Florida | 2018 | Chapter No. 2018-13 | HB 21 | Controlled Substances | All prescribers are required to complete a board-approved two-hour continuing education course on prescribing controlled substances. Prescriptions for Schedule II opioids prescribed for acute pain are limited to no more than a three-day supply (with exceptions for specified conditions), or up to a seven-day supply may be issued if it is determined to be medically necessary the prescriber records the acute medical condition and lack of alternative treatment options that justify deviation from the three-day supply limit, and indicates “acute pain exception” on the prescription. Dispensing practitioners are limited from dispensing a supply of a Schedule II opioid to three days, or up to a seven-day supply if the practitioner determines it is medically necessary, and follows the same specified procedures listed for prescribing Schedule II opioids for acute pain. All regulatory boards within the Department of Health are required to adopt rules establishing guidelines for the prescribing of controlled substances to treat acute pain. Practitioners who fail to follow the guidelines are subject to disciplinary action by respective boards. All prescribers and dispensers, or an authorized designee, are required to consult the prescription monitoring program to review a patient’s dispensing history prior to prescribing or dispensing a controlled substance for patients age 16 and older. Increases penalties for medically unnecessary or fraudulent prescriptions. Allows the Department of Health to enter into agreements or contracts to establish secure connections between the system and a prescribing or dispensing health care practitioner's electronic health recordkeeping system. Allows the state PDMP to share data with compatible systems from other states pursuant to agreements entered into by the Department of Health. Requires all Schedule V opioids dispensed to be reported to the PDMP by the dispenser. Aligns the state’s Controlled Substance Act with the federal schedules of controlled substances. Purges PDMP records after four years. |
| Florida | 2018 | Board of Dentistry | Implementing HB 21 (2018) | Rule: 64B5-12.013 Continuing Education Requirements; Specific Continuing Education Course Requirements; and Cardiopulmonary Resuscitation (CPR) Certification | All dentists registered with the DEA and authorized to prescribe controlled substances must complete a board-approved 2-hour course on prescribing controlled substances by Jan. 31, 2019 and at each subsequent biennium renewal or for reactivation of a license. |
| Florida | 2018 | Board of Dentistry | n/a | Rule 64B5-13.0046 | Failure of dentists to report controlled substance information to the PDMP results in a $250 fine and failure to consult the PDMP as required shall result in a $100 fine. |
| Florida | 2018 | Board of Dentistry | Implementing HB 21 (2018) | Rule: 64B5-17.0045 Standards for the Prescribing of Controlled Substances for the Treatment of Acute Pain | Standards of practice for dentists prescribing controlled substances for acute pain. Requirements include: evaluation of the patient and sufficient documentation; written treatment plan; informed consent and treatment agreement; periodic review; consultation with or referral to specialists; accurate and complete medical records; justification for any deviation from the 3-day prescription supply limit for a Schedule II opioid for acute pain; etc. |
| Georgia | 2018 | Department of Public Health | n/a | Rule 511-7-2-.07. Requests for prescription data held in the PDMP | Prescription monitoring information may be accessed by a PDMP operated by a government entity in another state, or an electronic medical records system operated by a prescriber or health care facility, provided that the program or system has been determined by DPH to contain legal, administrative, technical, and physical safeguards that meet or exceed the security measures employed by DPH in the operation of the PDMP. The rule also grants PDMP access to federal law enforcement or prosecutorial officials may obtain PDMP information with an administrative subpoena or civil investigation demand. |
| Hawaii | 2018 | Act 151 | HB 1602 | Opioid; Warning Label | A health care professional or pharmacist who dispenses any opioid drug shall include on the drug’s package a warning label that contains wording substantially similar to the following warning: "Caution: Opioid. Risk of overdose and addiction." |
| Hawaii | 2018 | Act 153 | SB 2646 | Relating To Prescription Drugs. | Requires prescribers to check the PDMP prior to prescribing all Schedule II through IV controlled substances, with exceptions. |
| Hawaii | 2018 | Act 155 | SB 2244 | Relating To Workers' Compensation. | Requires health care providers authorized to prescribe opioids to adopt and maintain a written policy or policies that include execution of a written agreement to engage in an informed consent process between the health care provider authorized to prescribe opioids and a qualifying injured employee. Initial concurrent prescriptions for opioids and benzodiazepines shall not be for longer than seven consecutive days, with exceptions for chronic pain, cancer, and others. |
| Illinois | 2018 | Public Act 100-1005 | HB 4650 | Controlled Substances--Prescription Monitoring | In a provision allowing pharmacists to authorize a designee to consult the Prescription Monitoring Program on their behalf, defines "pharmacist" to include, but be not limited to, a pharmacist associated with a health maintenance organization or a Medicaid managed care entity providing services under the Illinois Public Aid Code. |
| Illinois | 2018 | Public Act 100-0989 | HB 4707 | Prescription Drug Task Force Act | Creates the Prescription Drug Task Force Act. The Task Force shall: (1) study prescription opioid abuse in this State; (2) study the over-prescription of opioids such as Hydrocodone and Oxycodone; and (3) recommend any legislation, including amendments to the Illinois Controlled Substances Act that would have the effect of reducing opioid addiction and abuse. |
| Illinois | 2018 | Public Act 100-0861 | HB 4907 | Control Sub--PDMP & Adv Committee | Provides that the Department of Human Services, in consultation with the Advisory Committee, shall adopt rules allowing licensed prescribers or pharmacists who have registered to access the Prescription Monitoring Program to authorize a licensed or non-licensed designee employed in that licensed prescriber's office or a licensed designee in a licensed pharmacist's pharmacy, and who has received training in the federal Health Insurance Portability and Accountability Act (rather than a designee) to consult the Prescription Monitoring Program on their behalf. |
| Illinois | 2018 | Public Act 100-0575 | SB 1607 | Controlled Substances Monitor | Amends the Illinois Controlled Substances Act. Makes a technical change in a Section concerning the prescription monitoring program. |
| Illinois | 2018 | Public Act 100-1106 | SB 2777 | Controlled Substances -Continuing Ed | Provides that every prescriber who is required under this Act to be registered to prescribe controlled substances shall, during the pre-renewal period, complete 10 hours of continuing education in safe opioid prescribing practices. |
| Illinois | 2018 | Public Act 100-1093 | SB 2952 | Control Sub--PDMP & Adv Committee | Provides that the Department of Human Services, in consultation with the Advisory Committee, shall adopt rules allowing licensed prescribers or pharmacists who have registered to access the Prescription Monitoring Program to authorize a licensed or non-licensed designee (rather than any designee) employed in that licensed prescriber's office or licensed pharmacist's pharmacy and who has received training in the federal Health Insurance Portability and Accountability Act to consult the Prescription Monitoring Program on their behalf. Requires the Clinical Director of the Prescription Monitoring Program to select 6 members (rather than 5 members), 3 physicians, 2 pharmacists, and one dentist, of the Prescription Monitoring Program Advisory Committee to serve as members of the peer review subcommittee |
| Illinois | 2018 | Illinois Department of Healthcare and Family Services | n/a | Use of medications containing codeine and tramadol in children | Based on recommendations from the Illinois Drug Utilization Review Board, HFS is implementing an age edit that requires prior authorization for use of these products in children younger than 18 years of age effective April 6, 2018. |
| Indiana | 2018 | Public Law 193 | SB 139 | Investigation of overdose deaths. | Requires the county coroner to do the following if the county coroner reasonably suspects the cause of a person's death to be accidental or intentional overdose of a controlled substance: (1) Obtain any relevant information about the decedent maintained by the INSPECT program. (2) Extract and test certain bodily fluids of the decedent. (3) Report test results to the state department of health (department). (4) Provide the department notice of the decedent's death, including any information related to the controlled substances involved, if any. |
| Indiana | 2018 | Public Law 194 | SB 221 | INSPECT Program | The bill requires the following practitioners to obtain information about a patient from the data base before prescribing an opioid or benzodiazepine to the patient: (1) A practitioner who has had the information from the data base integrated into the patient's electronic health records. (2) Beginning January 1, 2019, a practitioner who provides services to the patient in the emergency department of a hospital or a pain management clinic. (3) Beginning January 1, 2020, a practitioner who provides services to the patient in a hospital. (4) Beginning January 1, 2021, all practitioners. The bill provides that a practitioner is not required to obtain information about a patient who is subject to a pain management contract from the INSPECT data base more than once every 90 days. |
| Indiana | 2018 | Public Law 55 | SB 225 | An Act to amend the Indiana Code concerning professions and occupations | Establishes continuing education requirements for licensed health care practitioners who apply for a controlled substances registration. Provides that the continuing education requirements expire July 1, 2025. |
| Indiana | 2018 | Indiana State Department of Health (w/ the Indiana Hospital Association & Indiana State Medical Association) | n/a | Indiana Guidelines for the Management of Acute Pain | This guideline is focused on the management of acute pain, and delineates a standardized process that includes key checkpoints for the clinician to pause and consider additional factors. These guidelines are appropriate for patients of all ages presenting with acute pain; however, they may not apply to acute pain resulting from exacerbations of underlying chronic conditions. The guidelines cover assessment and diagnosis of patient presenting with pain, developing a plan, treating the acute pain with non-pharmacologic treatment and pharmacologic treatment. They also outline Indiana's 2017 law (Act 226) that places limits on the opioid quantities that may be prescribed to patients. |
| Iowa | 2018 | Chapter 1138 | HF 2377 | A bill for an act relating to the regulation of certain substances, including the regulation of the practice of pharmacy, providing penalties, and including effective date provisions. | Establishes requirements related to the prescription monitoring program, electronic prescriptions, unsolicited prescriber activity reports, continuing education for opioid prescribers, and other related matters. |
| Kansas | 2018 | Kansas Prescription Drug and Opioid Advisory Committee | n/a | Kansas Prescription Drug and Opioid Misuse and Overdose Strategic Plan 2018-2022 | This strategic plan was developed around five priority areas: Prevention, Provider Education, Treatment and Recovery, Law Enforcement, and Neonatal Abstinence Syndrome (NAS). The goals, objectives, and strategies in the plan are driven by Kansas-specific data, support best practices, and aim to address multiple levels of impact. A limited quantity of hard copies will be available by request by emailing Theresa.Freed@ks.gov or by calling 785-296-5795. This project is supported by the Centers for Disease Control and Prevention’s (CDC) Prescription Drug Overdose: Data-Driven Prevention Initiative and the Substance Abuse and Mental Health Services Administration’s (SAMHSA) Partnerships for Success program. |
| Kentucky | 2018 | Acts, Chapter 40 | HB 2 | An Act Relating to Workers' Compensation | In part, requires the development of evidence-based treatment guidelines for medical treatment for use by medical providers, including but not limited to chronic pain management and opioid use. Related rules shall be promulgated by December 31, 2019. |
| Kentucky | 2018 | Acts, Chapter 30 | HB 213 | An Act relating to data-sharing of prescription drug monitoring information. | Amend KRS 218A.245 to allow KASPER data-sharing agreements with different types of jurisdictions. |
| Kentucky | 2018 | Acts, Chapter 108 | SB 6 | An Act relating to the safe disposal of controlled substances. | A pharmacist or a pharmacist's designee is required to inform persons verbally, in writing or by posted signage of methods for the sequestration or deactivation and disposal of unused, unwanted, or expired controlled substances anytime a controlled substance is dispensed; to permit a pharmacist or a pharmacist's designee to make available for purchase or distribute at no charge a nontoxic composition for the sequestration or deactivation and disposal of unused, unwanted, or expired controlled substances when a controlled substance is dispensed; require a practitioner who dispenses a controlled substance to inform all persons who receive a prescription about the importance of proper and safe disposal of unused, unwanted, or expired prescription drug and make available for purchase or distribute at no charge a nontoxic composition for the sequestration or deactivation and disposal of unused, unwanted, or expired controlled substances; encourage manufactures or distributors to enter into consignment-reimbursement contracts for inventory. |
| Louisiana | 2018 | Act No. 405 | SB 75 | Provides relative to the prescription monitoring program. | If a health profession licensing board becomes aware of a prescriber's first failure to comply with Prescription Monitoring Program requirements, the board shall notify the prescriber of the relevant statutory requirements and inform the prescriber of the need to correct or amend his prescribing practices. If a health profession licensing board becomes aware of a second or subsequent failure to comply, as verified by the data of the PDMP, the board shall treat the notification as a complaint against the licensee, but shall not consider such notice as evidence of deviation from standard of care. |
| Louisiana | 2018 | Act No. 28 | SB 90 | Provides relative to a voluntary nonopioid directive form. | Establishes provisions related to voluntary nonopioid directives. |
| Louisiana | 2018 | Act No. 232 | SB 109 | Provides relative to access to prescription monitoring information. | Grants PDMP access to epidemiologists with the Louisiana Department of Health for the purpose of assisting the board in analyzing prescription monitoring information in order to conduct public health evaluations to support public policy and education pursuant to an agreement with the board. |
| Louisiana | 2018 | Act No. 146 | SB 110 | Provides relative to definitions used for the prescription monitoring program. | Any drug who use requires PDMP tracking is automatically included within the definition of "drugs of concern." |
| Louisiana | 2018 | Act No. 32 | SB 134 | Provides relative to prescriptions for controlled dangerous substances. | Allows pharmacists to, upon the patient's request, dispense a partial fill of a Schedule II medication. |
| Louisiana | 2018 | Act 372 | SB 285 | HEALTH/ACC INSURANCE: Prohibits a health insurance issuer from denying a nonopioid prescription in favor of an opioid prescription. | When a physician prescribes a nonopioid medication for treatment of chronic pain, it shall be unlawful for a health insurance issuer to deny coverage of the nonopioid prescription drug in favor of an opioid prescription drug. When an opioid is deemed necessary and prescribed, the insurer may not substitute an alternative that would require: an increased number of pills per prescription; a higher DEA schedule medication than the one prescribed; or, an extended release medication that does not have abuse deterrent properties for a prescription that was intended to be abuse deterrent. |
| Maine | 2018 | Board of Dental Practice | n/a | Chapter 13: Continuing Education | Requires dentists to complete at least 40 credit hours of continuing education, including 3 hours that cover the prescription of opioid medication. |
| Maryland | 2018 | Chapter 435 | HB 115 | Maryland Health Care Commission - Electronic Prescription Records System - Assessment and Report | Requiring the Maryland Health Care Commission, in consultation with interested stakeholders, to assess the benefits and feasibility of developing an electronic system to allow health care providers to access a patient's prescription medication history; requiring the Commission to report its findings to the Governor and the General Assembly by January 1, 2020; specifying it is the intent of the General Assembly that the Commission work toward development of an electronic system for certain purposes; etc. |
| Maryland | 2018 | Chapter 772 | HB 517 | Prescription Drug Monitoring Program – Data Request Exemption – Surgical Procedures | Altering a certain provision of law to exempt a prescriber from being required to request certain data from the Prescription Drug Monitoring Program if the opioid or benzodiazepine is prescribed or dispensed to an individual to treat or prevent acute pain for not more than 14 days following any surgical procedure, rather than only surgical procedures in which general anesthesia was used; and making the Act subject to a certain contingency. |
| Maryland | 2018 | Chapter 215 | HB 653 | Health Care Providers - Opioid and Benzodiazepine Prescriptions - Discussion of Benefits and Risks | Requiring that certain patients be advised of the benefits and risks associated with the prescription of certain opioids and benzodiazepines under certain circumstances; and providing that a violation of the Act is grounds for disciplinary action by the health occupations board that regulates the health care provider who commits the violation. |
| Maryland | 2018 | Chapter 211 | HB 922 | Maryland Department of Health – "Pill Mill" Tip Line and Overdose Report | Requiring the Maryland Department of Health, on or before December 1, 2018, to identify a method for establishing a tip line through which a person may report an individual suspected of prescribing medication or overprescribing medication in violation of certain provisions of law; requiring, on or before July 1 each year, the Secretary of Health to examine the prescription and treatment history of individuals who suffered fatal overdoses involving opiates and other controlled substances and report the findings beginning July 1, 2019; etc. |
| Maryland | 2018 | Chapter 436 | SB 13 | Maryland Health Care Commission – Electronic Prescription Records System – Assessment and Report | Requiring the Maryland Health Care Commission, in consultation with interested stakeholders, to assess the benefits and feasibility of developing an electronic system to allow health care providers to access a patient's prescription medication history; requiring the Commission to report its findings to the Governor and the General Assembly by January 1, 2020; declaring the intent of the General Assembly that the Commission work toward development of an electronic system within the health information exchange; etc. |
| Maryland | 2018 | Chapter 216 | SB 522 | Health Care Providers - Opioid and Benzodiazepine Prescriptions - Discussion of Benefits and Risks | Requiring that certain patients be advised of the benefits and risks associated with the prescription of certain opioids and benzodiazepines under certain circumstances; and providing that a violation of the Act is grounds for disciplinary action by the health occupations board that regulates the health care provider who commits the violation. |
| Maryland | 2018 | Chapter 452 | SB 896 | Maryland Health Care Commission – Health Record and Payment Integration Program Advisory Committee | Requiring the Maryland Health Care Commission to establish a Maryland Health Record and Payment Integration Program Advisory Committee to study the feasibility of creating a health record and payment integration program, certain approaches, and certain other issues for purposes of improving health care coordination; requiring the Commission to submit the findings and recommendations of the Advisory Committee to the Governor and the General Assembly by November 1, 2019; etc. |
| Massachusetts | 2018 | Chapter 208 | HB 4742 | An Act for Prevention and Access To Appropriate Care and Treatment of Addiction | Requires the Department of Public Health to promulgate rules and regulations that require prescribers to utilize the prescription monitoring program each time a prescription for a narcotic drug that is contained in Schedule II or III, or a prescription for a benzodiazepine, prior to issuance. Allows the department to require prescribers to utilize the PDMP prior to the issuance of any Schedule IV or V prescription drug, which is commonly misused and may lead to physical or psychological dependence or which causes patients with a history of substance dependence to experience significant addictive symptoms. Creates a commission to review, make recommendations and report on non-opioid and non-pharmacological pain management strategies. Requires the commission to: (1) develop a plan for insurers to provide adequate coverage and access to non-pharmacological pain management treatment administered by health care providers licensed by the commonwealth, and (2) develop reasonable standards by which to assess provider networks and patient utilization of evidence-based treatment for pain management. |
| Michigan | 2018 | Act. No. 101 | HB 5678 | Health occupations; health professionals; bona fide prescriber-patient relationship before prescribing or dispensing a controlled substance; modify beginning date. | Moves the date by which a bona fide prescriber-patient relationship would be required in order to prescribe Schedule 2 to 5 controlled substances to March 31, 2019 (or on the date when the rules defining exceptions are promulgated). Because it would be after the date the exceptions to the relationship would be defined by LARA and the boards, it is hoped that any patient groups that would otherwise be adversely and unintentionally affected by the relationship requirement would be accounted for in the exceptions. |
| Minnesota | 2018 | Minnesota Department of Human Services; Minnesota Department of Health | n/a | Minnesota Opioid Prescribing Guidelines | Guidelines for treating pain in all phases: acute, post-acute, and chronic. Recommendations relevant to all pain phases include: use of the prescription monitoring program; avoiding concurrent use of opioids and benzodiazepines; avoiding opioids when possible, specifically when treating certain enumerated conditions; providing patient education and obtaining informed consent; education on safe storage and disposal; co-prescription of naloxone; etc. Contains suggestions to avoid prescribing above certain MMEs/day based on various stages of pain. |
| Missouri | 2018 | Section 374.426 | SB 718 | Patient Satisfaction Scores | Specifies that patient scoring of pain control shall not be required when defining data standards for quality of care and patient satisfaction. Beginning August 28, 2018, the Director of the Department of Insurance, Financial Institutions and Professional Registration shall discontinue the use of patient satisfaction scores. |
| Missouri | 2018 | Sections 195.010 and 195.080 | SB 826 | Modifies provisions relating to health care | Limits certain initial prescriptions of opioid controlled substances to no more than a 7-day supply for the treatment of acute pain. Prior to prescribing the opioid, a practitioner shall consult with the patient regarding the quantity of the opioid and the patient's option to fill the prescription in a lesser quantity, as well as inform the patient of the risks associated with the prescribed opioid. If, in the practitioner's medical judgment, more than a 7-day supply is required to treat the patient, the practitioner may issue a prescription for the quantity needed after noting in the patient's medical record the condition triggering the necessity for a greater quantity and that a nonopioid was not appropriate. The provisions of this act shall not apply to prescriptions for a patient who is currently undergoing treatment for cancer, is receiving hospice care or palliative care, is a resident of a long-term care facility, or is receiving treatment for substance abuse or opioid dependence. No pharmacy or pharmacist shall be liable or subject to disciplinary action for dispensing or refusing to dispense medication in good faith pursuant to an otherwise valid prescription that exceeds these prescribing limits. |
| Missouri | 2018 | Department of Health and Senior Services, Bureau of Narcotics & Dangerous Drugs |  | Controlled Substance Guidelines for Missouri Practitioners | The Missouri Bureau of Narcotics and Dangerous Drugs (BNDD) are publishing this guideline as a ready reference and review of the most common controlled substance laws. This guide does not address every single statute and regulation but it addresses the most common requirements and questions from practitioners. The guideline covers subjects related to pain and Schedule II medications such as: documentation, storage, inventory, packaging, labeling, supervision, disposal, written and verbal prescriptions, electronic prescribing, multiple prescriptions, initial opiate prescriptions for acute pain, prescribing authority for mid-level practitioners, and more. |
| Missouri | 2018 | Department of Health and Senior Services, Bureau of Narcotics & Dangerous Drugs |  | Controlled Substance Guidelines for Emergency Medical Services | The Bureau of Narcotics and Dangerous Drugs has published this guideline as a quick reference source. This guideline is a compilation of the most commonly asked questions and issues arising daily. This guideline is designed chronologically in the order of obtaining a registration, purchasing and stocking, administering, record keeping and security issues. |
| Montana | 2018 | Montana Prescription Drug Registry |  | Searching the Montana Prescription Drug Registry (MPDR) Database | Required training for physicians, other prescribers, pharmacists, and authorized agents (delegates). Contains information of how to search the database, authorized users, privacy and security, correcting PDMP data, searching patient and prescription history, interstate data sharing, report formats, delegate authority, etc. |
| Montana | 2018 | Department of Labor and Industry, Employment Relations Division |  | Chronic Pain Disorder: Montana Utilization and Treatment Guidelines | Provides procedures to implement medical treatment guidelines and to foster communication to resolve disputes among the provider, payer, and patient through the Administrative Rules of Montana. Discuses patient education, informed consent, treatment parameter duration, active interventions, therapeutic exercise, positive patient response, patient reevaluation, surgical interventions, six-month time frame, return to work, and delayed recovery. Contains opioid-specific sections on opioid/chemical treatment programs and opioid medication medical management. Discusses opioids in regard to laboratory testing. Contains a section specific to opioids that helps practitioners determine whether opioid therapy is appropriate. Makes recommendations related to single prescriber/single pharmacy, opioid treatment agreements, lowest possible effective dosing, urine drug testing, pill counts, utilizing the prescription monitoring program, and utilizing appropriate treatment guidelines. |
| Nebraska | 2018 | Section 38-145 | LB 731 | Relating to public health; etc. | The continuing competency requirements for a nurse midwife, dentist, physician, physician assistant, nurse practitioner, podiatrist, and veterinarian who prescribes controlled substances shall include at least three hours of continuing education biennially regarding prescribing opiates. The continuing education may include, but is not limited to, education regarding prescribing and administering opiates, the risks and indicators regarding development of addiction to opiates, and emergency opiate situations. One-half hour of the three hours of continuing education shall cover the prescription drug monitoring program. |
| Nebraska | 2018 | Section 28-401.01 | LB 931 | Provide requirements for opiate and controlled substance prescriptions | Prior to prescribing a Schedule II controlled substance or any opiate, the prescriber shall have a conversation with the patient regarding risks of addiction/informed consent. Sets opioid limits. |
| Nebraska | 2018 | NRS 28-473 | Implementing LB 931 (2018) | Schedule II controlled substance or other opiate; practitioner; duties. | Requires prescribers, at various times during treatment, to have a conversation with the patient regarding risks of addiction/informed consent. |
| Nebraska | 2018 | NRS 28-474 | Implementing LB 931 (2018) | Opiates; legislative findings; limitation on certain prescriptions; practitioner; duties. | A practitioner who is prescribing an opiate to an outpatient minor use for an acute condition shall not prescribe more than a seven-day supply and, if the practitioner has not previously prescribed an opiate for such patient, shall discuss with a parent or guardian of such patient, or with the patient if the patient is an emancipated minor, the risks associated with use of opiates and the reasons why the prescription is necessary. If, in the professional medical judgment of the practitioner, more than a seven-day supply of an opiate is required, the practitioner may issue a prescription for the quantity needed to treat such patient's medical condition or pain. The practitioner shall document the medical condition triggering the prescription of more than a seven-day supply of an opiate in the patient's medical record and shall indicate that a nonopiate alternative was not appropriate to address the medical condition. |
| Nebraska | 2018 | Nebraska Medicaid | n/a | Preferred Drug List with Prior Authorization Criteria | Short-acting opioid analgesics are limited to a maximum quantity limit of 150 tablets/capsules per 30 days. Opiate limits for opiate naïve patients will be limited to no more than a 7 day supply no more than 50 MME/day, with exceptions. |
| Nebraska | 2018 | Nebraska Medicaid | n/a | n/a | An initial limit of 300 MME daily will be put in place in December of 2018 for Nebraska Medicaid patients with chronic pain, unless being treated for active cancer, enrolled in hospice, or receiving end of life care. Claims for total daily doses of more than 300 MME will reject beginning December 6, 2018 unless a prior authorization is on file. Nebraska Medicaid plans to lower the maximum MME to: • 250 MME in June 2019 • 200 MME in December 2019 • 150 MME in June 2020 • 120 MME in December 2020 • 90 MME in June 2021 If patients are being treated for pain due to an active case of cancer, enrolled in hospice or receiving end of life care, a prior authorization form will need to be completed and submitted to prevent a disruption in care. |
| New Hampshire | 2018 | Chapter 158 | SB 573 | Relative to the controlled drug prescription health and safety program and making an appropriation therefor. | Allows the chief medical examiner and delegates to register and access the controlled drug prescription health and safety program. Makes an appropriation to the controlled drug prescription health and safety program. |
| New Hampshire | 2018 | New Hampshire Medicaid | n/a | NH Fee-for-Service (FFS) Medicaid Preferred Drug List (PDL)/Clinical Prior Authorization (PA) Updates/ Web Portal Information/E-mail Notifications | Effective December 1, 2018, revisions were made to the clinical prior authorization rules applying to long acting opioid analgesics. |
| New York | 2018 | Chapter 57 | SB 7507 | Amending Various Laws, generally (Budget) | No opioids shall be prescribed to a patient initiating or being maintained on opioid treatment for pain which has lasted more than three months or past the time of normal tissue healing, unless the medical record contains a written treatment plan that follows generally accepted national professional or governmental guidelines. Exceptions apply in the case of patients who are being treated for cancer that is not in remission, who are in hospice or other end-of-life care, or whose pain is being treated as part of palliative care practices. |
| New York | 2018 | Chapter 273 | SB 8987 | An act to amend the public health law, in relation to allowing for the use of medical marihuana as an alternative to opioids for pain management | Amends section 3360 of the public health law, which lists conditions eligible for medical marijuana. Adds as an eligible condition pain that degrades health and functional capability where the use of medical marijuana is an alternative to opioid use. |
| North Dakota | 2018 | Board of Medicine, Board of Nursing, Board of Pharmacy | n/a | North Dakota Tri-Regulator Position Statement on Opioid Prescribing/Dispensing | Statement outlining proactive efforts that we expect from our licensees to help ensure safe and effective pain management. Healthcare professionals should: educate themselves on standard of care and evidence-based approaches; document appropriate pain evaluation and management approach; consider non-opioids; utilize the PDMP; develop a realistic treatment plan; educate patients; refer patients to specialists, as appropriate. |
| Ohio | 2018 | State Medical Board | n/a | Chapter 4731-11 Controlled Substances | Starting December 23, 2018 Ohio prescribers will need to follow new regulations when prescribing opioids for the treatment of long-term pain (lasting 12 weeks or more) and subacute pain (lasting between six and 12 weeks). Physicians are required to engage in conversations with patients before starting on long-term medication treatment to ensure opioids are improving function and the patient is offered non-opioid treatments when appropriate. Sets requirements that prescribers must follow at 50 MME/day, 80 MME/day, and 120 MME/day. Limits opioids in excess of 120 MME/day without a recommendation from a board certified pain specialist. |
| Oklahoma | 2018 |  | HB 2795 | Controlled dangerous substances; directing medical facility owners that prescribe certain drugs on a monthly basis to register with the State Bureau of Narcotics and Dangerous Drugs Control; effective date. | Every person who owns in whole or in part a public or private medical facility for which a majority of patients are issued on a reoccurring monthly basis a prescription for opioids, benzodiazepines, barbiturates or carisoprodol, but not including Suboxone or buprenorphine, shall obtain a registration issued by the Director of the Oklahoma State Bureau of Narcotics and Dangerous Drugs Control. |
| Oklahoma | 2018 |  | HB 2798 | Public health and safety; creating the Opioid Overdose Fatality Review Board; effective date. | Creates the Opioid Overdose Fatality Review Board. |
| Oklahoma | 2018 |  | HB 2931 | Controlled dangerous substances; requiring electronic prescribing for all scheduled drugs; effective date. | Requires electronic prescriptions to be used when prescribing Schedule II through V controlled substances, with exceptions. |
| Oklahoma | 2018 |  | SB 848 | Opioid drugs; requiring continuing education courses for certain professions; requiring the Insurance Department to conduct a study; requiring Oklahoma State Bureau of Narcotics and Dangerous Drugs Control to submit a report. Emergency. | Requires prescribers to obtain at least one hour of continuing education for each year of a licensing period related to pain management and/or opioid use and addiction. Explicitly makes prescribing, dispensing, or administering opioid drugs in excess of the maximum authorized limits grounds for which penalties may be imposed. Disallows pharmacists from filling a Schedule II opioid prescription in any dosage other than specified (while still maintaining the right not to fill at all). |
| Oklahoma | 2018 |  | SB 937 | Anti-Drug Diversion Act; authorizing tribal access to prescription-monitoring-program. | Allows the Director of OBNDD to authorize access to the central repository by tribal law enforcement agencies. |
| Oklahoma | 2018 |  | SB 1446 | Regulation of opioid drugs; providing limitations on quantities of certain prescriptions. | Provides that the Board of Medical Licensure is to require a licensee receive not less than one hour of education in pain management and opioid use and addiction each year preceding an application for renewal of a license, unless the licensee has demonstrated to the satisfaction of the Board that the licensee does not currently hold a valid federal Drug Enforcement Administration registration number. The measure modifies the definition of “unprofessional conduct” by including the prescribing, dispensing or administering opioid drugs in excess of the authorized maximum dosages. The measure adds various definitions as used in the Uniform Controlled Dangerous Substances Act relating to the prescribing of opioids. The measure provides that the failure of a registrant to access and check the central repository is grounds for disciplinary action. The measure allows OBNDD to make unsolicited notifications to the licensing boards of a pharmacist or practitioner. The measure restricts initial prescriptions for opioids to a seven-day supply. The measure requires the Insurance Department to evaluate the effect of the limits on prescriptions of opioid medication on claims paid by health insurance carriers. |
| Oregon | 2018 | Chapter 45 | HB 4143 | Relating to drugs; and declaring an emergency. | Requires Director of Department of Consumer and Business Services to study barriers to effective treatment for and recovery from substance use disorders, including addictions to opioids and opiates, and to report and make recommendations to Legislative Assembly not later than June 30, 2018. Requires Director of Department of Consumer and Business Services to study barriers to medication assisted] effective treatment for and recovery from substance use disorders, including addictions to opioids and opiates, and to report and make recommendations to Legislative Assembly not later than June 30, 2018. Sunsets January 2, 2019. Directs Oregon Health Authority to implement pilot project to place peer recovery support mentors in emergency departments to support] determine effectiveness of establishing immediate access to appropriate evidence-based treatments for persons who suffer from] opioid and opiate overdoses. Requires authority to report on pilot project to interim committee of Legislative Assembly not later than December 31 of each year. Sunsets January 2, 2021. Requires practitioners to register with prescription monitoring program not later than July 1, 2018. |
| Oregon | 2018 | Oregon Health Authority (Medicaid) | n/a | Oregon Acute Opioid Prescribing Guidelines | Makes recommendations for the treatment of patients with acute pain not currently on opioids, relating to: patient assessment; documentation; checking the prescription monitoring program; providing patient education/informed consent; etc. Prescribers are urged to, "Prescribe the lowest effective dose of short-acting opioids usually for a duration of less than 3 days; in cases of more severe acute pain limit initial prescription to less than 7 days." |
| Oregon | 2018 | Oregon Health Authority (Medicaid) | n/a | Reducing Opioid Overdose, Misuse and Dependency: A guide for CCOs | A coordinated care organization (CCO) is a network of all types of health care providers (physical health care, addictions and mental health care and dental care providers) who work together in their local communities to serve people who receive health care coverage under the Oregon Health Plan (Medicaid). This guide from the Oregon Health Plan recommends that CCOs: implement prescribing guidelines in clinical settings; encourage and incentive contract providers to implement the prescribing guidelines; and develop policies to assure use among prescribers. Contains specific recommendations related to emergency departments, use of the prescription monitoring program, providing coverage for non-opioid treatments, co-prescription of naloxone for at-risk patients, and pharmacy lock-in programs. |
| Oregon | 2018 | Health Evidence Review Commission, Oregon Health Authority (Medicaid) | n/a | Urine Drug Testing | Oregon Medicaid coverage related to urine drug testing. In patients receiving chronic opioid therapy for chronic pain, random UDT is recommended for coverage (weak recommendation), with frequency of testing depending on the patient’s risk level (using a validated opioid risk assessment tool). Definitive testing is recommended for coverage as a confirmatory test only when the result of the presumptive testing is inconsistent with the patient’s history, presentation, or current prescribed medication plan, and the results would change management--and should not exceed 12 tests per year. For Low Risk: Random presumptive testing up to two times per year. For Moderate Risk: Random presumptive testing up to four times per year. For High Risk: Random presumptive testing up to 12 times per year. |
| Pennsylvania | 2018 | Act No. 96 | HB 353 | Further providing for definitions and for professional prescription, administration, and dispensing. | Creates exemptions to the requirements to utilize the PDMP. |
| Pennsylvania | 2018 | Department of Health | n/a | Obstetrics & Gynecology Opioid Prescribing Guidelines | Guidelines covering topics such as: non-opioid treatment options, patient evaluations, screening for substance use disorder, informed consent, PDMP checks, use of opioids for pain during pregnancy, use of opioids for pain during and following delivery, use of opioids for pain in women who are breastfeeding, use of opioids for pain during labor and delivery and/or postpartum who are receiving medication-assisted treatment for opioid use disorder, etc. |
| Pennsylvania | 2018 | Department of Health | n/a | Safe Prescribing for Workers' Compensation | Guidelines covering topics such as: functional restoration, acute and post-operative pain, chronic pain, non-opioid options, documentation, treatment plans, urine drug testing, PDMP checks, informed consent, effects of opioids on work ability, naloxone, etc. |
| Pennsylvania | 2018 | Department of Health | n/a | Treating Chronic Non-Cancer Pain | Guidelines covering topics such as: non-opioid treatment options, patient evaluations, urine drug testing, informed consent, dosages, naloxone, documentation, discontinuation of opioid therapy, PDMP checks, etc. |
| Pennsylvania | 2018 | Department of Health | n/a | Treatment of Pain in an Emergent Setting | Guidelines relating to the Emergency Department setting, covering topics such as: non-opioid treatment options, opioid limits, patient evaluations, informed consent, dosages, naloxone, documentation, PDMP checks, etc. |
| Rhode Island | 2018 | Chapter 150 / Chapter 254 | H 7416 / S 2541 | Pharmacies--partial Fills | Allows for partial fills of Schedule II controlled substances. |
| Rhode Island | 2018 | Chapter 152 / Chapter 252 | H 7496 / S 2539 | Uniform Controlled Substances Act -- Non-opiate Directive | Establishes a procedure for individuals to file a revocable voluntary non-opiate directive form with the person's licensed health care practitioner. |
| Rhode Island | 2018 | Chapter 183 / Chapter 277 | H 8313 / S 2930 | Naloxone Access | Requires the director of the department of health to develop best practices for co-prescribing opioid antagonists to patients who are prescribed opioid analgesics. |
| Rhode Island | 2018 | Chapter 288 | S 3004 | The Good Samaritan Overdose Prevention Act Of 2016 | Requires the director of the department of health to develop best practices for co-prescribing opioid antagonists to patients who are prescribed opioid analgesics. |
| Rhode Island | 2018 | Department of Health | n/a | Pain Management, Opioid Use and the Registration of Distributors of Controlled Substances in Rhode Island (216-RICR-20-20-4) | Requires ICD-10 codes to be entered and transmitted with a prescription for controlled substances; requires naloxone to be co-prescribed under certain conditions; and, cites resources for patient education on RIDOHs website. Requires that prior to initiating a prescription for an opioid drug, and upon second refill and/or upon the third prescription, the provider must discuss with patients or their guardians the risks associated with the prescription, including dependence/addiction, overdose, concurrent use of alcohol or other psychoactive medications, safe operation of motor vehicles, safeguarding of medications, alternative treatments, and relapse risk factors. Lowers the co-prescription threshold from ninety (90) morphine milligram equivalents (MMEs) to more than or equal to fifty (50) MMEs, in line with the Centers for Disease Control and Prevention's recommendations on such prescriptions. Requires documentation in patient medical records of reasons why co-prescription of naloxone is not appropriate if the provider does not prescribe it, allowing for patient refusal of such prescription. |
| Rhode Island | 2018 | Department of Health | n/a | Prescription Drug Monitoring Program (216-RICR-20-20-3) | Clarifies the exemption from PDMP submission for pharmacies that do not have RI Controlled Substance Registrations, removes superfluous language and statutory reiteration, clarifies information that must be submitted to the PDMP, revises the information submission time period to reflect statute, and includes updates to cite new statute for Management of Information. |
| South Carolina | 2018 | Act No. 242 | H 3819 | Opioid analgesics, prescriptions to minors | Implements strong informed consent requirements that practitioners must follow when prescribing opioids. |
| South Carolina | 2018 | Act No. 243 | H 3826 | Prescriptions | A written prescription for any Schedule II, III, IV, and V controlled substance must be written on tamper-resistant prescription pads which contain one or more industry-recognized features. |
| South Carolina | 2018 | Act No. 168 | H 4488 | Prescription Monitoring Program | Grants PDMP access to a coroner, deputy coroner, medical examiner, or deputy medical examiner who is involved in a specific inquiry into the cause and manner of death of a designated person pursuant to Chapter 5, Title 17. |
| South Carolina | 2018 | Act No. 234 | S 345 | Advanced practice registered nurses, scope and standards of practice | Revises the prescriptive authority of certain advanced practice registered nurses with respect to controlled substances and authorizes physician assistants to perform telemedicine to include authorized prescribing of Schedule II and Schedule III prescriptions. |
| South Carolina | 2018 | Act No. 201 | S 918 | Opioid prescriptions, limits, prescription report cards | Initial opioid prescriptions for acute pain management or postoperative pain management must not exceed a seven-day supply, except when clinically indicated for cancer pain, chronic pain, hospice care, palliative care, major trauma, major surgery, treatment of sickle cell disease, treatment of neonatal abstinence syndrome, or medication-assisted treatment for substance use disorder. Upon any subsequent consultation for the same pain, the practitioner may issue any appropriate renewal, refill, or new opioid prescription. Contains exceptions. The department shall develop and maintain as part of the prescription monitoring program a system to provide prescription report cards to practitioners to inform the practitioner about certain prescribing trends. |
| South Carolina | 2018 | South Carolina Department of Health and Human Services, Healthy Connections Medicaid | n/a | Opioid Prescribing Limits | Effective May 1, 2018, prescribers must limit the initial prescribing of opioid medications for the treatment of acute or post-operative pain to the lowest effective dose and for a quantity no more than necessary for the expected duration of pain. Providers must not exceed a five day supply or 90 morphine milligram equivalents (MMEs) daily, except in the cases of chronic pain, cancer pain, pain related to sickle cell disease, hospice care, palliative care or medication-assisted treatment for substance use disorder. If, in a prescriber’s clinical judgement, an initial supply of more than five days or 90 MMEs is medically necessary, the prescriber must document that need in the patient’s medical record. Failure to adhere to these requirements is a violation of SCDHHS coverage policy and shall result in the recoupment of Medicaid funds for the service during which the prescription was issued. SCDHHS intends to initiate necessary recoupments beginning with claims for dates of service on or after July 1, 2018. |
| South Carolina | 2018 | Governor Henry McMaster | n/a | South Carolina Opioid Emergency Response Plan | The South Carolina Opioid Emergency Response Team is tasked with reviewing state resources and developing methods to address specified elements of the opioid crisis in the state. In part, the Team is tasked with changing health professional prescribing practices to reduce unnecessary opioid usage and the expansion of the Joint Revised Pain Management Guidelines. |
| South Dakota | 2018 | Board of Pharmacy | n/a | 20:51:32:02. Data submission. | Each dispenser may submit data to the PDMP using any electronic device compatible with the board's receiving device or the receiving device of the board's contracted vendor every 24 hours or by midnight of the next business day after dispensing. If the dispenser does not have an automated recordkeeping system capable of producing an electronic report of the required data in the format established by the American Society for Automation in Pharmacy (ASAP), the dispenser may request a waiver from the electronic reporting requirement from the board. If the board grants a waiver from the electronic reporting requirement, then the dispenser shall comply with an alternative method of reporting the data as determined by the board, such as submitting the required data on a form approved by the board. |
| South Dakota | 2018 | Board of Pharmacy | n/a | 20:51:32:04. Access to data. | Prescribers and dispensers of controlled substances may request on-line access to the data for the purpose of providing patient health care. A healthcare practitioner authorized to prescribe may designate one or more persons who are licensed or registered with the respective regulatory board to serve as a delegate. Prior to being granted access to program information, a practitioner or delegate shall submit a request for registration and program access. The board shall conduct regular reviews of data access by practitioners to identify possible violations of law or breach of professional standards that may have occurred. Whenever such information is identified, the board will notify the appropriate professional licensing, certification or regulatory agency or entity, and provide information necessary for an investigation. |
| South Dakota | 2018 | Board of Pharmacy | n/a | 20:51:32:07. Disclosure of data -- Regulatory board. | A state board or regulatory agency with appropriate authority may request information electronically or in writing. The request shall include a statement of its purpose and authority, the name and license number of the individual, the date range requested, and the specific reasons for the request. |
| South Dakota | 2018 | Board of Pharmacy | n/a | 20:51:32:08. Disclosure of data -- Law enforcement. | A local, state, and federal law enforcement or prosecutorial official engaged in the enforcement of laws related to controlled substances may request information for the purpose of an investigation or prosecution of the drug-related activity or probation or parole compliance of an individual. The board shall verify the status of the law enforcement or prosecutorial official with the appropriate authority. The electronic or written request shall include the individual's name and date of birth, the date range requested, and the specific reasons for the request,that must be approved by the board prior to the release of the information. |
| Tennessee | 2018 | Public Chapter 864 | HB 901 | As enacted, requires the bureau of TennCare to promulgate rules to promote the safe and responsible coverage of opioids for TennCare members who have the TennCare pharmacy benefit; requires report on rules to the general assembly. | Requires the Bureau of TennCare to monitor the use of prescribed opioids by TennCare enrollees and require prior authorizations in certain circumstances, except for enrollees with medical conditions that warrant an exemption, through a state pharmacy benefit manager or managed care organization contract. |
| Tennessee | 2018 | Public Chapter 1039 | HB 1831 | As enacted, makes various changes to the requirements for prescribing, dispensing, and reporting of opioids. | Makes various changes to the requirements for prescribing, dispensing, and reporting of opioids. As with prior to the passage of Public Chapter 1039, a healthcare practitioner can treat a patient with a three-day supply of an opioid at a total dosage of 180 morphine milligram equivalent (MME) total dosage without any new requirements. A healthcare practitioner may treat a patient with more than a three-day supply of an opioid if the healthcare practitioner treats the patient with no more than one (1) prescription for an opioid per encounter and meets certain evaluation and documentation requirements. If a healthcare practitioner treats a patient with more than a three-day supply of an opioid, the healthcare practitioner may treat the patient with no more than a ten-day supply and with a dosage that does not exceed a total of a five hundred (500) morphine milligram equivalent dose. In rare cases, a healthcare practitioner may treat a patient with up to a twenty-day supply of an opioid and with a dosage that does not exceed a total of an eight hundred fifty (850) morphine milligram equivalent dose. Includes exemptions, including exemptions specific to pain specialists. Requires the Commissioner of the Department of Health (DOH), in consultation with the Division of Health Related Boards (HRB), to study and analyze the impact and effects of the restrictions and limitations set forth in this Act. Requires the Commissioner of the DOH to issue a report, no later than November 1, 2021, relative to the impact and effects of such restrictions and limitations to the Governor, the Health and Welfare Committee of the Senate, and the Health Committee of the House of Representatives. |
| Tennessee | 2018 | Public Chapter 883 | HB 1993 | As enacted, requires health care prescribers to issue prescriptions for Schedule II controlled substances electronically by July 1, 2020, with certain exceptions; establishes other provisions regarding electronic prescriptions. | The commissioner of health shall study the issues related to requiring the use of electronic prescriptions for controlled substances by all authorized prescribers in this state to the full extent permitted by federal law. On or before January 15, 2019, the commissioner shall report any recommendations and findings to the health committee of the house of representatives and the health and welfare committee of the senate. |
| Tennessee | 2018 | Public Chapter 901 | HB 2348 | As enacted, requires a prescriber to provide certain information prior to prescribing more than a three-day supply of an opioid or an opioid dosage that exceeds a total of a 180 morphine milligram equivalent dose to a woman of childbearing age. | If a health care prescriber prescribes more than a five (5) day supply of opioids to a non-pregnant fertile woman, the prescriber shall inform the patient of the risk of fetal injury and neonatal abstinence syndrome in the event of pregnancy while on therapy. Contains related documentation rules. |
| Tennessee | 2018 | Public Chapter 978 | SB 777 | As enacted, makes various changes and additions to law concerning opioids; creates task force with duty to promulgate rules that create a uniform minimum disciplinary action that will apply to any healthcare practitioner who treats a human patient with an opioid and that healthcare practitioner's licensing board or agency finds that the healthcare practitioner engaged in a significant deviation or pattern of deviation from sound medical judgment; requires comptroller to conduct certain studies. | As enacted, makes various changes and additions to law concerning opioids; creates task force with duty to promulgate rules that create a uniform minimum disciplinary action that will apply to any healthcare practitioner who treats a human patient with an opioid and that healthcare practitioner's licensing board or agency finds that the healthcare practitioner engaged in a significant deviation or pattern of deviation from sound medical judgment; requires comptroller to conduct certain studies. |
| Tennessee | 2018 | Public Chapter 1007 | SB 2025 | As enacted, authorizes a partial fill of a prescription of a controlled substance; enacts other related provisions. | Allows for partial fills of Schedule II controlled substances. |
| Tennessee | 2018 | Public Chapter 843 | SB 2155 | As enacted, specifies that a healthcare provider must not be required to pay the portion of the risk sharing payment that is attributable to the increased cost of pain relief services under any payment reform initiative involving the use of episodes of care with respect to TennCare, if certain conditions are met. | In developing or implementing any payment reform initiative involving the use of episodes of care, the bureau and the HCFA shall exclude charges related to pain relief that decreases the use of opioids from the calculation of costs for any episode of care. This subsection shall apply to any initiative receiving a state innovation model initiative grant from federal centers for Medicare and Medicaid services. |
| Tennessee | 2018 | Department of Health; Department of Mental Health & Substance Abuse Services | Implementing Public Chapter 112 (2017) | Tennessee Nonresidential Buprenorphine Treatment Guidelines | These guidelines focus on how buprenorphine may be used by prescribers. They largely relate to the treatment of opioid use disorder, not prescribing opioids for pain management. However, there is a small section on "Buprenorphine and Pain" that reiterates Tennessee Code 53-11-311(a): “Any product containing buprenorphine, whether with or without naloxone, may only be prescribed for a use recognized by the federal food and drug administration. This subsection (a) shall not apply to a person: (1) Who has a documented diagnosis of opiate addiction as shown in their medical record; (2) Who receives treatment from a provider practicing under 21 U.S.C. §823(g)(2); and (3) Who is counted against the total number of patients allowed to the provider as set forth in 21 U.S.C. § 823(g)(2).” The section states that, to effectively treat substance use disorder and chronic pain, both must addressed simultaneously. Non-opioids are suggested as a first-line treatment for pain. |
| Tennessee | 2018 | TennCare (Tennessee Medicaid) | n/a | Changes to Prior Authorization Criteria and quantity limits for the Preferred Drug List (PDL) | Effective January 16, 2018, TennCare has implemented an edit on agents in the short-acting and long-acting narcotics classes of the PDL that will impact all first-time and non-chronic opioid users. Members can receive opioid coverage up to 15 days in a 180 period at the maximum dosage of 60 MME/day. All first-fill scripts in a 180 day period will be limited to a 5 day supply of a short-acting opioid at a maximum dose of 60 MME/day. After the first fill, members can receive an additional 10 days at a maximum of 60 MME/day. Limited use exceptions are available for treatment of pain due to severe burn or corrosion, sickle cell disorder, or those residing in a Medicaid-certified nursing facility; when an exception applies, patients can receive up to 45 days with a maximum dose of 60 MME/day. All long-acting narcotics require prior authorization. |
| Texas | 2018 | Texas Medicaid Vendor Drug Program | n/a | Morphine Equivalent Dose Limitations for Traditional Medicaid to Decrease | Beginning Jan. 9, 2018, Texas HHS will limit the daily morphine equivalent dose that people enrolled in traditional Medicaid may receive. The initial limit will be set at 300 MED, and will apply to all opioid prescriptions with exceptions for those people diagnosed with cancer or those receiving palliative or hospice care. The maximum allowable limit will decrease over time according to the following tentative schedule: January 2018, 300 MED; May 2018, 240 MED; September 2018, 160 MED; January 2019, 90 MED. Claims that exceed the 300 limit will reject during pharmacy claims processing. Prescribing providers requesting an override for claims exceeding the maximum allowable limit must contact the Texas Prior Authorization Call Center at 1-877-PA-TEXAS. |
| Utah | 2018 | Session Law Chapter 318 | HB 37 | Occupational and Professional Licensing Amendments | Amends the educational requirement for prescribers of controlled substances related to SBIRT (Screening, Brief Intervention, and Referral to Treatment) training. |
| Utah | 2018 | Session Law Chapter 327 | HB 127 | Controlled Substance Database Act Amendments | Changes the requirements for checking the controlled substance database; delays enforcement of the requirements in this bill to check the controlled substance database; modifies the authority of the Division of Occupational and Professional Licensing to review the controlled substance database to identify any prescriber who may be overprescribing opioids; grants the Division of Occupational and Professional Licensing the authority to provide education or training to certain prescribers and to take other enforcement action; and modifies enforcement provisions. |
| Utah | 2018 | Session Law Chapter 123 | HB 158 | Controlled Substance Database Revisions | Modifies provisions related to the PDMP. Modifies who may be penalized for failing to submit information to the PDMP. Makes technical changes. |
| Utah | 2018 | Session Law Chapter 145 | HB 399 | Opioid Abuse Prevention and Treatment Amendments | Requires the Department of Health to develop a pamphlet with information about opiates; and requires a pharmacist who is dispensing certain prescriptions for an opiate to affix a warning label and to display an informational brochure. |
| Utah | 2018 | Division of Occupational and Professional Licensing | Implementing HB 37 (2018) | 58-37-6.5. Continuing education for controlled substance prescribers. | Amends the educational requirement for prescribers of controlled substances related to SBIRT (Screening, Brief Intervention, and Referral to Treatment) training. |
| Utah | 2018 | Division of Occupational and Professional Licensing | Implementing HB 37 (2018) | 58-37f-402. Online tutorial and test relating to the database -- Fees -- Rulemaking authority -- Continuing professional education credit. | Requires the Division to develop an online tutorial and an online test for registration to use the PDMP database that provides instruction regarding, and tests, the following: (a) the purpose of the database; (b) how to access and use the database; (c) the law relating to: (i) the use of the database; and (ii) the information submitted to, and obtained from, the database; and (d) basic knowledge that is important for all people who prescribe controlled substances to know in order to help ensure the health and safety of an individual to whom a controlled substance is prescribed. |
| Utah | 2018 | Division of Occupational and Professional Licensing | Implementing HB 158 (2018) | 58-37f-301. Access to database. | Modifies who may be penalized for failing to submit information to the PDMP. |
| Utah | 2018 | Division of Occupational and Professional Licensing | Implementing HB 399 (2018) | 58-37-7. Labeling and packaging controlled substance -- Informational pamphlet for opiates. | Sets strict rules related to the labeling of controlled substances, with specific instructions for the labeling of Schedule II or III opiates. Requires pharmacists to display opiate-related pamphlets developed by the Department of Health and requires related patient counseling. |
| Utah | 2018 | Utah Medicaid | n/a | Utah Medicaid Provider Manual, Drugs with Quantity Limits | In addition to drug-specific limits (found within the Provider Manual), cumulative limits for any combination of short-acting opioids and/or opioid/APAP combination products is 180 tablets per 30 days (independent of long-acting opioid accumulation). In addition to the drug-specific limits, cumulative limits for any combination of long-acting opioids is 90 tablets per 30 days (independent of short-acting and/or opioid/APAP combination product accumulation). The cumulative limit may be overridden if the prescriber writes a valid ICD code for cancer on the face of the prescription. Initial prescriptions for over a 7 day supply require prior authorization. Fentanyl is mutually exclusive with Methadone and all other long acting opioids. Methadone is mutually exclusive with Fentanyl and all other long acting opioids. All other opioids are not mutually exclusive with each other. |
| Utah | 2018 | Utah Medicaid | n/a | Initial Prescriptions of Short Acting Opiates Prescribed by Dentists | Effective July 1, 2018, Utah Medicaid will restrict the initial fill of short acting opiates to no more than a 3-day supply when prescribed by a dentist. When a claim for a short acting opiate is submitted to Utah Medicaid, the pharmacy claims processing system will determine whether the member has had a prescription for the same medication in the previous 60 days. If the member has not had a claim for the same medication in the previous 60 days, the system will treat the claim as an initial fill and allow no more than a 3-day supply. If a claim has been filled for the member for the same medication in the previous 60 days, then the claims processing system will allow the claim to process for up to a 30-day supply; however, the claim will be subject to all limitations and restrictions including, but not limited to, early refills and quantity limits. |
| Utah | 2018 | Utah Department of Health; Utah Medical Association | n/a | Utah Clinical Guidelines on Prescribing Opioids for Treatment of Pain | Guidelines intended to be "suggestions on how to properly use and prescribe opioid medication." Contains sections on acute pain and chronic pain. Makes recommendations related to use of non-opioids, checking the prescription monitoring program, using shorting acting opioids rather than long acting, prescribing the lowest effective dose, informed consent and patient education, substance use disorder screening, use of a written treatment plan and agreement, discontinuing treatment, etc. |
| Virginia | 2018 | Chapter 239 | HB 313 / SB 728 | Prescription Monitoring Program; prescriber and dispenser patterns. | Requires the Director of the Department of Health Professions to annually review controlled substance prescribing and dispensing patterns. The bill requires the Director to conduct such review in consultation with an advisory panel consisting of representatives from the relevant health regulatory boards, the Department of Health, the Department of Medical Assistance Services, and the Department of Behavioral Health and Developmental Services. The bill requires the Director to make any necessary changes to the criteria for unusual patterns of prescribing and dispensing and report any findings and recommendations for best practices to the Joint Commission on Health Care by November 1 of each year. |
| Virginia | 2018 | Chapter 102 | HB 1173 / SB 632 | Limits on prescription of controlled substances containing opioids. | Eliminates the surgical or invasive procedure treatment exception to the requirement that a prescriber request certain information from the Prescription Monitoring Program (PDMP) when initiating a new course of treatment that includes prescribing opioids for a human patient to last more than seven days. Under current law, a prescriber is not required to request certain information from the PDMP for opioid prescriptions of up to 14 days to a patient as part of treatment for a surgical or invasive procedure. The bill has an expiration date of July 1, 2022. |
| Virginia | 2018 | Chapter 379 | HB 1556 / SB 832 | Prescription Monitoring Program; covered substances. | Adds controlled substances included in Schedule V for which a prescription is required and naloxone to the list of covered substances the dispensing of which must be reported to the Prescription Monitoring Program. |
| Virginia | 2018 | Chapter 108 | SB 735 | Prescription Monitoring Program; disclosure of information; Department of Medical Assistance Services. | Allows the Director of the Department of Health Professions to disclose information about a specific recipient of covered substances who is a recipient of medical assistance services to a physician or pharmacist licensed in the Commonwealth or his designee who holds a multistate licensure privilege to practice nursing or a license issued by a health regulatory board within the Department of Health Professions and is employed by the Department of Medical Assistance Services, for the purpose of determining eligibility for and managing the care of the recipient in a Patient Utilization Management Safety or similar program. |
| Washington | 2018 | WSR 18-20-085, Podiatric Medical Board | Implementing HB 1427 (2017) | Citation of Rules Affected by this Order: New WAC 246-922-675, 246-922-680, 246-922-685, 246-922-690, 246-922-695, 246-922-700, 246-922-705, 246-922-710, 246-922-715, 246-922-720, 246-922-725, 246-922-730, 246-922-735, 246-922-740, 246-922-745, 246-922-750, 246-922-755, 246-922-760, 246-922-765, 246-922-770, 246-922-775, 246-922-780, 246-922-785 and 246-922-790; repealing WAC 246-922-663, 246-922-664, 246-922-665, 246-922-666, 246-922-667, 246-922-668, 246-922-669, 246-922-670, 246-922-671, 246-922-672 and 246-922-673; and amending WAC 246-922-660, 246-922-661, and 246-922-662. | Chapter 246-922 WAC, Podiatric physicians and surgeons, the podiatric medical board (board) has adopted new sections, amendments, and repeal of existing rule establishing requirements and standards for prescribing opioid medications by podiatric physicians. The adopted rules provide a necessary framework and structure for safe, consistent opioid prescribing practice that comply with ESHB 1427. Rules relate to the treatment of acute, perioperative, subacute, and chronic pain. Inpatient pain, cancer-related pain, and procedural premedications are not included. Provisions include: safe storage and disposal; use of alternative modalities; continuing education; diagnosis identified on prescription; patient evaluation; treatment plan; written treatment agreements; consultations and referrals; pain management specialists; high doses of opioids; special populations; co-prescribing; naloxone; required use of the prescription monitoring program; etc. |
| Washington | 2018 | WSR 18-20-086, Nursing Care Quality Assurance Commission | Implementing HB 1427 (2017) | Citation of Rules Affected by this Order: New WAC 246-840-4651, 246-840-4653, 246-840-4655, 246-840-4657, 246-840-4659, 246-840-4661, 246-840-4663, 246-840-4665, 246-840-4667, 246-840-4935, 246-840-4940, 246-840-4950, 246-840-4955, 246-840-4960, 246-840-4970, 246-840-4980 and 246-840-4990; repealing WAC 246-840-473, 246-840-480 and 246-840-483; and amending WAC 246-840-460, 246-840-463, 246-840-465, 246-840-467, 246-840-470, 246-840-475, 246-840-477, 246-840-485, 246-840-487, 246-840-490, and 246-840-493. | Chapter 246-840 WAC, the nursing care quality assurance commission (commission) has adopted new sections and changes to existing rule that establish requirements and standards for prescribing opioid drugs by advanced registered nurse practitioners (ARNP). The adopted rules provide a necessary framework and structure for safe, consistent opioid prescribing practice consistent with the directives of ESHB 1427. Rules relate to the treatment of acute, perioperative, subacute, and chronic pain. Inpatient pain, cancer-related pain, and procedural premedications are not included. Provisions include: safe storage and disposal; use of alternative modalities; continuing education; diagnosis identified on prescription; patient evaluation; treatment plan; written treatment agreements; consultations and referrals; pain management specialists; high doses of opioids; special populations; co-prescribing; naloxone; required use of the prescription monitoring program; etc. |
| Washington | 2018 | WSR 18-20-087, Board of Osteopathic Medicine and Surgery | Implementing HB 1427 (2017) | Citation of Rules Affected by this Order: New WAC 246-853-675, 246-853-680, 246-853-685, 246-853-690, 246-853-695, 246-853-700, 246-853-705, 246-853-710, 246-853-715, 246-853-720, 246-853-725, 246-853-730, 246-853-735, 246-853-740, 246-853-745, 246-853-750, 246-853-755, 246-853-760, 246-853-765, 246-853-770, 246-853-775, 246-853-780, 246-853-785, 246-853-790, 246-854-255, 246-854-260, 246-854-265, 246-854-270, 246-854-275, 246-854-280, 246-854-285, 246-854-290, 246-854-295, 246-854-300, 246-854-305, 246-854-310, 246-854-315, 246-854-320, 246-854-325, 246-854-330, 246-854-335, 246-854-340, 246-854-345, 246-854-350, 246-854-355, 246-854-360, 246-854-365 and 246-854-370; repealing WAC 246-853-663, 246-853-664, 246-853-665, 246-853-666, 246-853-667, 246-853-668, 246-853-669, 246-853-670, 246-853-671, 246-853-672, 246-853-673, 246-854-243, 246-854-244, 246-854-245, 246-854-246, 246-854-247, 246-854-248, 246-854-249, 246-854-250, 246-854-251, 246-854-252 and 246-854-253; and amending WAC 246-853-660, 246-853-661, 246-853-662, 246-854-240, 246-854-241, and 246-854-242. | Chapter 246-853 WAC, Osteopathic physicians and surgeons and chapter 246-854 WAC, Osteopathic physician assistants, the board of osteopathic medicine and surgery (board) has adopted new sections, amendments, and repeal of sections to existing rules that establish requirements and standards for prescribing opioid drugs by osteopathic physicians and osteopathic physicians assistants. The adopted rules provide a necessary framework and structure for safe, consistent opioid prescribing practice that comply with the directives of ESHB 1427. Rules relate to the treatment of acute, perioperative, subacute, and chronic pain. Inpatient pain, cancer-related pain, and procedural premedications are not included. Provisions include: safe storage and disposal; use of alternative modalities; continuing education; diagnosis identified on prescription; patient evaluation; treatment plan; written treatment agreements; consultations and referrals; pain management specialists; high doses of opioids; special populations; co-prescribing; naloxone; required use of the prescription monitoring program; etc. |
| Washington | 2018 | WSR 19-02-043, Dental Quality Assurance Commission | Implementing HB 1427 (2017) | Citation of Rules Affected by this Order: New WAC 246-817-906, 246-817-907, 246-817-908, 246-817-909, 246-817-911, 246-817-913, 246-817-916, 246-817-919, 246-817-966, 246-817-967, 246-817-970, 246-817-971, 246-817-975, 246-817-976, 246-817-977 and 246-817-980; repealing WAC 246-817-910, 246-817-925, 246-817-940 and 246-817-945; and amending WAC 246-817-901, 246-817-905, 246-817-915, 246-817-920, 246-817-930, 246-817-935, 246-817-950, 246-817-955, 246-817-960, and 246-817-965. | Chapter 246-817 WAC, the dental quality assurance commission (commission) has adopted new sections and changes to existing rule that establishes requirements and standards for prescribing opioid drugs by dentists. The adopted rules are the result of a supplemental hearing. The rules provide a necessary framework and structure for safe, consistent opioid prescribing practice consistent with the directives of ESHB 1427. Rules relate to the treatment of acute, perioperative, subacute, and chronic pain. Inpatient pain, cancer-related pain, and procedural premedications are not included. Provisions include: safe storage and disposal; use of alternative modalities; continuing education; diagnosis identified on prescription; patient evaluation; treatment plan; written treatment agreements; consultations and referrals; pain management specialists; high doses of opioids; special populations; co-prescribing; naloxone; required use of the prescription monitoring program; etc. |
| Washington | 2018 | Department of Health, Emergency Department Opioid Abuse Work Group | n/a | Washington Emergency Department Opioid Prescribing Guidelines | Prescribing pain medicine for chronic pain from the ED should be limited to only the immediate treatment of acute exacerbations of pain associated with objective findings of uncontrolled pain. Discourages use of intravenous and intramuscular opioids for exacerbations of chronic pain. ED providers should not provide replacements for lost controlled substance prescriptions. Methadone and long-acting opioids should not be used in the ED. EDs are encouraged to use the Emergency Department Information Exchange. Physicians should send patient pain agreements to the local EDs and work to include a plan for pain treatment in the ED. Prescriptions for controlled substances from the ED should state that the patient is required to provide government issued photo identification. For exacerbations of chronic pain, the emergency medical provider should contact the patient’s primary opioid prescriber or pharmacy. Emergency medical providers should only prescribe enough pills to last until the office of the patient’s primary opioid prescriber opens. Prescriptions for opioid pain medication from the ED for acute injuries, such as fractured bones, in most cases should not exceed 30 pills. |
| Washington | 2018 | Agency Medical Directors' Group, Dr. Robert Bree Collaborative | n/a | Prescribing Opioids for Postoperative Pain - Supplemental Guidance | Sets forth guidance related to prescribing opioid for chronic pain, deviations from which should be well-documented in the medical record. Even in exceptions, initial prescriptions shall not exceed two weeks. |
| West Virginia | 2018 | Chapter 46 | SB 273 | Opioid Reduction Act | Relating to reducing the use of certain prescription drugs; requiring consultation with patients prior to prescribing an opioid; limiting the amount of opioid prescriptions; requiring a narcotics contract in certain circumstances; providing exceptions to prescribing limits; providing for referral to a pain clinic or pain specialist; providing reports to licensing boards regarding abnormal or unusual prescribing practices; requiring referral to certain alternative treatments; requiring insurance coverage for certain procedures to treat chronic pain; updating board’s titles; requiring the Board of Pharmacy to report quarterly to various licensing boards; exempting the Board of Pharmacy from certain purchasing requirements; clarifying who must report to the Controlled Substances Monitoring Program Database; clarifying the practice of acupuncture; precluding retaliation against a heath care provider for declining to prescribe a narcotic; and permitting the investigation and discipline for abnormal and unusual prescribing and dispensing of prescription drugs. |
| West Virginia | 2018 | Board of Pharmacy | n/a | Controlled Substances Monitoring Program | The Board of Pharmacy adopted several changes to the PDMP to add the following as authorized to receive PDMP information: • A dean of a medical school located in this state or his or her designee to access prescriber level data to monitor prescribing practices of faculty members, prescribers and residents enrolled in a degree program at the school where he or she serves as dean. • Authorized agents of the WV Bureau for Medical Services. • Authorized agents of the WV Office of Health Facility Licensure and Certification for use in certification, licensure, and regulation of health facilities. • A physician reviewer designated by an employer of medical providers to monitor prescriber level information of prescribing practices of physicians, advance practice registered nurses, or physician assistants in their employ. • A chief medical officer of a hospital, or a physician designated by the chief executive officer of a hospital which does not have a medical officer, to monitor prescriber level information of prescribing practices of prescribers who have admitting privileges to the hospital. |
| Wisconsin | 2018 | Act 262 | AB 907 | Relating to: continuing education in prescribing controlled substances for certain health care practitioners; maintenance and detoxification treatment provided by physician assistants and advanced practice nurse prescribers; requiring school boards to provide instruction about drug abuse awareness and prevention; etc. | Requires the dentistry examining board, medical examining board, the podiatry affiliated credentialing board, the Board of Nursing, and the Optometry Examining Board to submit a report that details proactive efforts taken by the board to address the issue of opioid abuse. The Boards must: specify if they have required, or otherwise encouraged, continuing education related to prescribing controlled substances; set goals for addressing the issue of opioid abuse, as that issue pertains to or implicates the practices of the professions regulated by the board; and describe the actions taken by the board so that the goals identified can be achieved, whether those goals have been achieved, and, if the goals have not been achieved, the reasons. |
| Wisconsin | 2018 | Controlled Substances Board | n/a | CR 17-028 Operation of the prescription drug monitoring program | Requires a practitioner or delegate to review the PDMP before prescribing unless the patient is receiving hospice care, the prescription is for three days or less, the drug is administered to the patient, the practitioner is unable to review the PDMP due to an emergency or because the PDMP is not operation or other technological failure that is reported to the board. The board may refer a practitioner that fails to review the PDMP to the licensing board for discipline. Requires the submission of dispensing data to be done before the end of the next business day after a drug was dispensed. Allows health care professionals to access audit trails about themselves and their delegates. A practitioner may access the audit trails accessible to health care professionals and a prescribing metrics report about themselves. Medical coordinators may access prescribing metrics reports and audit trails about individuals they direct or supervise or if they are evaluating the job performance or performing quality assessment and improvement activities. |
| Wisconsin | 2018 | Wisconsin Medical Examining Board | n/a | Opioid Prescribing Guideline | Guideline intended help providers make informed decisions about acute and chronic pain treatment -pain lasting longer than three months or past the time of normal tissue healing. The guideline is not intended for patients who are in active cancer treatment, palliative care, or end-of-life care. Practitioners should maximize use of non-opioid therapies, check the PDMP, start low and go slow, avoid long-acting opioids, and follow-up regularly. The guideline discusses determining whether to initiate opioid therapy, opioid selection and dosage, assessing risk, naloxone co-prescriptions, tapering, and use or urine drug testing. Duration limits are suggested. |
| Wyoming | 2018 | Chapter No. 106 | SF 78 | Opioid addiction task force. | Creates a task force to consider the PDMP, electronic prescribing of controlled substances, strategies to reduce the administration of opioids including promotion of alternative treatments and possible limits on opioids, prescriber and dispenser education, and other related matters. |
| Wyoming | 2018 | Chapter No. 96 | SF 83 | Controlled substance prescription tracking. | Requires registration with the PDMP for all practitioners that are authorized to dispense any controlled substance in Schedules II through V. Requires dispensers to report all Schedule II through V controlled substances to the PDMP. |

| Appendix C: Pain and Opioid CME Requirements for Physicians | | | |
| --- | --- | --- | --- |
|  | **Total CME Hours (CMEs) Required** | **Pain and Opioid CME Requirements** | **Number of Affected Prescribers** | |
| Alabama | 25 AMA PRA Category 1 CMEs every year | All Alabama Controlled Substance Certificate holders must obtain 2 AMA PRA Category 1 or equivalent CMEs every 2 years beginning in 2018. Acceptable programs confer Category 1 CMEs in the areas of: (1) controlled substance prescribing practices, (2) recognizing signs of the abuse or misuse of controlled substances, or (3) controlled substance prescribing for chronic pain management. No course pre-approval is required.  Medical Directors of pain management clinics can qualify by completing 40 in-person, live participatory AMA PRA Category 1 CEs in pain management within 3 years prior to serving as a medical director. | 7,160 4,5,9 | |
| Alaska | 50 AMA PRA Category 1 CMEs every 2 years, or Category 1 or 2 AOA every two years | For license renewals for those with a DEA registration, at least 2 of the total CMEs required to qualify for renewal must be specific to pain management and opioid use and addiction. AMA PRA Category 1 education qualifies. | 1,310 9  MD  446  DO | |
| Arizona | 40 CMEs every 2 years. Many forms of education qualify, including AMA PRA Category 1. Publishing also counts toward education. For DOs, not more than 8 hours of annual CMEs may be obtained by completing AMA PRA Category 1 (they need 24 AOA). | A.R.S. § 32-3248.02 requires all healthcare professionals who hold Drug Enforcement Administration certifications to complete a minimum 3 CMEs in an opioid related, substance-use disorder related, or addiction related course each renewal cycle as part of the annual continuing education requirement for licensure. | 12,030 9 | |
| Arkansas | 20 CMEs every year. 50% must be Category 1 and in the physician's primary area of practice. | For physicians who primarily treat pain, at least 10 CMEs annually must relate to pain.  Physicians operating a pain management program should meet the following: 3 years’ experience in the interdisciplinary management of persons with chronic pain; participation in active education on pain management at a local or national level; Board certification in a medical specialty or completion of training sufficient to qualify for examinations by members of the American Board of Medical Specialties; 2 years’ experience in the medical direction of an interdisciplinary Chronic Pain Program or at least 6 months of pain fellowship. The physician must have completed at least one of the following: attendance at one meeting per year of a regional and national pain society; presentation of an abstract to a regional or national pain society; publication on a pain topic in a peer reviewed journal; membership in a pain society at a regional or national level. | 6,567 5,6  MD  438 5,6  DO | |
| California | MD requires 50 AMA PRA Category 1 CMEs every 2 years; DO requires 100 AMA PRA Category 1 CMEs every 2 years, but 40 credits must be AOA1-A or AOA1-B. | There is a one-time requirement of 12 CMEs in pain management and care of the terminally ill (except for Pathologists and Radiologists) that must be completed by the physician's second license renewal date or within 4 years, whichever comes first. The 12 CMEs may be divided in any way that is relevant to the physician's specialty and practice setting. The Medical Board will accept any combination of the two topics totaling 12 hours. For physicians and surgeons licensed on or after 01 January 2019, the course must include the subject of risks of addiction associated with the use of Schedule II drugs. As an alternative to the above 12-hour requirement, a physician or surgeon may complete a one-time continuing education course of 12 CMEs in the subjects of treatment and management of opiate-dependent patients, including 8 hours of training in buprenorphine treatment, or other similar medicinal treatment, for opioid use disorders. | 64,140 9 | |
| Connecticut | 50 CMEs (AMA PRA Category 1, AOA, etc.) every 2 years. One CME means a minimum of 50 minutes of continuing education activity. Continuing medical education shall be in an area of the physician’s practice. | During the first renewal period and not less than every six years thereafter, there is a 1-hour "risk management" requirement. This requirement can be fulfilled with a CME on prescribing controlled substances and pain management. CME shall be in an area of the physician’s practice. | 17,418  MD  808  DO | |
| Florida Medical | 40 AMA PRA Category 1 CMEs every 2 years | 2 hours of AMA Category 1 or AOA Category 1-A CMEs on prescribing controlled substances, every 2 years | 78,050 | |
| Florida Osteopathic | 40 CMEs every 2 years | 2 hours of AMA Category 1 or AOA Category 1-A CMEs on prescribing controlled substances, every 2 years | 8,644 | |
| Georgia | 40 AMA PRA Category 1 CMEs every 2 years | Every physician not subject to Rule 360-15-.01(3) who maintains an active DEA certificate and prescribes controlled substances, except those holding a residency training permit, shall complete at least one time 3 or more hours of AMA/AOA PRA Category 1 CME that is designed specifically to address controlled substance prescribing practices. The controlled substance prescribing CME shall include instruction on controlled substance prescribing guidelines, recognizing signs of the abuse or misuse of controlled substances, and controlled substance prescribing for chronic pain management. The certification of such completion must occur at the first renewal following January 1, 2018 or the first renewal following licensure. Completion of this requirement may count as three hours toward the CME requirement for license renewal.” Rule 360-15-.01(3) states: “Physicians who do not hold a certification in pain management or palliative medicine, and whose opioid pain management patients comprise 50% or more of the patient population must demonstrate competence by biennially obtaining 20 (twenty) hours of continuing medical education ("CME") pertaining to pain management or palliative medicine.” | 15,110 1,6,8,9 | |
| Illinois | 150 CMEs every 3 years, 60 of which must be AMA PRA Category 1 | Beginning in 2020, 3 CMEs on safe opioid prescribing practices offered or accredited by a professional association, state government agency, or federal agency every licensing period | 23,250 9 | |
| Indiana | No CME requirement for MDs and DOs, except for new requirement for opioids | Beginning in 2019, 2 CMEs addressing the topic of opioid prescribing and opioid abuse every licensing period | 14,700 9 | |
| Iowa | 40 AMA PRA Category 1 CMEs every two years | 2 CMEs in Chronic Pain Management every 5 years | 5,560 9 | |
| Kentucky | 60 CMEs every 3 years. Of the 60 CMEs, 30 must be AMA PRA Category 1 or AOA Category 1 by an organization accredited by the Accreditation Council on Continuing Medical Education or the AOA Council on Continuing Medical Education. | Minimum of 4.5 hours of HB1 (House Bill 1) approved CMEs for physicians authorized to prescribe or dispense controlled substances every licensing period. The education must relate to the use of KASPER (their prescription monitoring program), pain management, addiction disorders, or a combination of two or more of those subjects. The requirement may be met with one, 4.5 hour course or multiple courses totaling 4.5 hours. | 6,060 9 | |
| Louisiana | 20 AMA PRA Category 1 CMEs every year | One time requirement: Effective 01 January 2018, as a condition to license renewal, all practitioner licensed to prescribe controlled substances are required to obtain CMEs pertaining to drug diversion training, best practices regarding prescribing of controlled substances, appropriate treatment of addiction, and any other matters pertaining to the prescribing of controlled substances that are deemed appropriate by the board. | 17,664  MD  563  DO | |
| Maine | 100 CMEs every 2 years. For MDs, 40 CMEs must be AMA Category 1. For DOs, 40 CMEs must be AOA Category 1. All must be Category 1 if an osteopathic specialist. | Effective 31 December 2017, 3 CMEs of opioid prescribing required every 2 years for all clinicians who prescribe opioids. 3 CMEs of any Category 1 AMA approved program on the prescribing of opioids suffice. | 3,840 2,9 | |
| Maryland | 50 AMA PRA Category 1 CMEs every 2 years | 1 CME every 2 years on opioid prescribing | 37,853  MD  1,764  DO | |
| Massachusetts | 100 CMEs every 2 years. Of that 100, 40 must be AMA PRA Category 1 or AOA. | 10 CMEs on Risk Management (Minimum of 4, Category 1 CMEs); 3 CMEs on opioid education and pain management for renewals. Risk management study must include instruction in medical malpractice prevention such as risk identification, patient safety, and loss prevention. It may include courses in medical ethics, quality assurance, medical-legal issues, patient relations, non-economic aspects of practice management, or courses designed to reduce the likelihood of medical malpractice through means other than increasing the licensee's medical education and technical competence. Risk management study also includes review of the Board's Patient Care Assessment regulations (243 CMR 3.01-3.16) and participation on designated peer review committees dealing with quality assurance. Effective 01 February 2012, physicians applying to renew a license or obtain a new license must complete at least 3 CMEs in pain management and opioid education. The requirement applies to all physicians who prescribe controlled substances (Schedules I through VI). According to state regulations, such education includes training in effective pain management, identification of patients at high risk for substance abuse, counseling patients about side effects, and the addictive nature and proper storage and disposal of prescription drugs. These CEUs will qualify as either Category 1 or Category 2, and may be counted as risk management credits. | 27,340 9 | |
| Michigan Medical | 150 CMEs every 3 years. Of those, a minimum of 75 must be AMA PRA Category 1 | 3 CME (of the 150) must be earned in the area of pain and symptom management | 34,559 | |
| Michigan Osteopathic | 150 CMEs every 3 years; 60 must be Category 1 | 3 CME (of the 150) must be earned in the area of pain and symptom management | 8,281 | |
| Minnesota | 75 AMA PRA Category 1 CMEs every 3 years | Effective 01 January 2020, licensees with the authority to prescribe controlled substances obtain at least 2 CMEs on best practices in prescribing opioids and controlled substances, including nonpharmacological and implantable device alternatives for treatment of pain and ongoing pain management, as part of the continuing education requirements for licensure renewal. | 15,438 7 | |
| Mississippi | 40 AMA PRA Category 1 CMEs every 2 years | 5 CME (of the 40) related to prescribing medications, with emphasis on controlled substances required for licensees with active DEA certificates | 3,330 9 | |
| Nebraska | 50 AMA PRA Category 1 CMEs every 2 years | Effective 01 October 2018, 3 hours every 2 years regarding prescribing opiates. This may include education regarding prescribing and administering opiates, risks and indicators regarding opiate addiction development and emergency opiate situations. 1/2 hour of the 3 shall cover the PDMP | 9,500 1  MD  1,328 1  DO | |
| Nevada | 40 AMA PRA Category 1 CMEs every 2 years for MDs. 35 AMA PRA Category 1 (or AOA 1-A) CMEs every year (10 must be AOA 1-A) for DOs. | 2 CME (of the total requirement) relating specifically to the misuse and abuse of controlled substances, the prescribing of opioids or addiction during each period of licensure. | 4,050 9 | |
| New Hampshire | 100 CMEs every 2 years. 40 must be AMA PRA Category 1. | 3 opioid CMEs for physicians with a DEA license every 2 years. This requirement is not waived for anyone (even if their other CME requirements are waived). There is an approval process for this education. | 3,460 9 | |
| New Jersey | 100 CMEs every 2 years. 40 must be AMA PRA Category 1. | Effective with 2019 and subsequent renewals, for all prescribers, 1 CME (of the 100) concerning prescription opioid drugs, including responsible prescribing practices, alternatives to opioids for managing and treating pain, and the risks and signs of opioid abuse, addiction, and diversion. | 22,800 9 | |
| New Mexico Medical | 75 AMA PRA Category 1 CMEs every 2 years | 5 CME (of the 75) in pain management. Appropriate courses should include a review of NM Medical Board Rule 16.10.14 NMAC on pain management; an understanding of the pharmacology and risks of controlled substances, a basic awareness of the problems of abuse, addiction and diversion, and awareness of state and federal regulations for the prescription of controlled substances. | 3,300 9 | |
| New Mexico Osteopathic | 75 Category 1 CMEs every 2 years | 6 CME (of the 75) in pain management. Appropriate courses should include a review of 16.17.5 NMAC, management of the treatment of pain, an understanding of the pharmacology and risks of controlled substances, a basic awareness of the problems of abuse, addiction and diversion, and awareness of state and federal regulations for the prescription of controlled substances. | 654 | |
| New York | No general CME requirement. | All prescribers licensed to treat humans who have a DEA registration to prescribe controlled substances, as well as medical residents who prescribe controlled substances under a facility DEA registration, must complete at least 3 hours of course work or training in pain management, palliative care, and addiction. The following 8 topic areas must be included: New York State and federal requirements for prescribing controlled substances; pain management; appropriate prescribing; managing acute pain; palliative medicine; prevention, screening, and signs of addiction; responses to abuse and addiction; end of life care. | 59,140 9 | |
| North Carolina | 60 Category 1 CMEs that are "relevant to the physician's current or intended specialty or area of practice" every 3 years | Every physician who prescribes controlled substances, except those with residency status, shall complete at least 3 Category 1 CMEs (counts toward the overall 60) that are specifically designed to address controlled substance prescribing practices. The course shall include instruction on controlled substances prescribing practices, recognizing signs of the abuse or misuse of controlled substances, and controlled substance prescribing for chronic pain management. | 19,180 1,9 | |
| Ohio | 100 CMEs every 2 years. 40 must be AMA PRA Category 1. | Each physician owner of a pain management clinic shall complete at least 20 hours of category I CMRs in pain medicine every 2 years, to include one or more courses addressing the potential for addiction. The courses completed in compliance with this rule shall be accepted toward meeting the Category I requirement for certificate of registration renewal for the physician. | 30,400 5,9 | |
| Oklahoma | For MD, 60 AMA PRA Category 1 CMEs every 3 years; for DOs, 16 AOA 1-A or B CMEs every year. | For MDs, 1 CME in pain management or 1 CME in opioid use or addiction each year preceding renewal of a license, if holding a DEA registration. For DOs, 1 CME every other year on prescribing, dispensing, and administering controlled substances. | 6,070 9 | |
| Oregon | 60 AMA PRA Category 1 CMEs every 2 years. CMEs must be relevant to the provider's current practice. | Within the first year of licensure, licensees must complete CMEs on pain management. A 1-hour course provided by the Oregon Pain Management Commission​​ is required plus at least 6 more CMEs in pain management or the treatment of terminally ill and dying patients. Those 6 CMEs may be made up of any combination of CME coursework focusing on pain management and/or treatment of terminally ill and dying patients. This is a one-time requirement, but licensees may choose to obtain additional hours on these topics throughout their careers. The topic of pain management is legally considered relevant for all licensees, regardless of their specialty. | 13,113  MD  1,382  DO | |
| Pennsylvania Medical | 100 CMEs every 2 years. At least 20 of the 100 CMEs must be AMA PRA Category 1. | 4 Board-approved CMEs consisting of 2 CMEs in pain management or the identification of addiction and 2 CMEs in the practices of prescribing or dispensing of opioids; subsequent renewals require 2 CMEs on pain management, identification of addiction, or prescribing practices. | 48,463 | |
| Pennsylvania Osteopathic | 100 CMEs every 2 years. At least 20 of the 100 CMEs must be Category 1. | 4 Board-approved CMEs consisting of 2 CMEs in pain management or the identification of addiction and 2 CMEs in the practices of prescribing or dispensing of opioids; subsequent renewals require 2 CMEs on pain management, identification of addiction, or prescribing practices. | Not available | |
| Rhode Island | 40 AMA PRA Category 1 (or AOA 1-A) CMEs every 2 years | 8 CMEs on topics such as: appropriate prescribing for pain, pharmacology, potential for dependence, and alternatives to opioids for pain management. Those who have taken DATA 2000 training to prescribe buprenorphine will be exempt from the 8-hour continuing education requirement. Training must be completed at least once per career and must occur before the next renewal of your controlled substance registration in June of 2018. | 5,019  MD  400  DO | |
| South Carolina | 40 AMA PRA Category 1 CMEs every 2 years. At least thirty CMEs must be related directly to the licensee's practice area. | 2 CMEs related to approved procedures of prescribing and monitoring controlled substances listed in Schedules II, III, and IV for all licensees. Further, at least 30 of the general CMEs must be related directly to the licensee's practice area, so pain specialists need 30+ pain-related CMEs. | 22,000 5,6 | |
| Tennessee | For MDs, 40 hours AMA PRA Category 1 CMEs every 2 years. For DOs, 40 hours AOA 1A or 2A CMEs every 2 years. | 2 CMEs (of the 40) which must include instruction in: the Department's treatment guidelines on opioids, benzodiazepines, barbiturates, and carisoprodol; topics such as medicine addiction, risk management tools, and other topics approved by the Board. Providers of intractable pain treatment must have specialized CMEs in pain management. If you do not have a DEA registration and do not prescribe, at least 2 of the 40 required hours shall be in a course or courses designated specifically to address prescribing practices.  Medical doctors and osteopathic physicians who are board certified by the American Board of Medical Specialties (ABMS), American Osteopathic Association (AOA) or the American Board of Physician Specialties in 1 or more of the following specialties or subspecialties do not have to complete the 2 CME on controlled substance prescribing: Pain management, Anesthesiology, Physical medicine and rehabilitation, Neurology, or Rheumatology. | 9,900 8,9 | |
| Texas | 48 CMEs every 2 years.  Of the 48, at least 24 must be AMA/PRA/ACCME/AOA courses. | Per Board rule 195.4(e), the medical director of a pain management clinic must, on an annual basis, ensure that all personnel (including the medical director) are properly licensed, and if applicable, trained to include 10 CMEs related to pain management. This CME requirement applies to all personnel providing medical services to the patients (including, but not limited to: PAs, x-ray techs, phlebotomists, RNs, MAs, etc.). | 45,250 5,9 | |
| Utah Medical | 40 CMEs every 2 years. 34 CMEs must be AMA PRA Category 1. 6 CMEs may be from Division of Occupational and Professional Licensing. | 3.5 CMEs every 2 years on controlled substance prescribing. The 3.5 CMEs shall include: the scope of the controlled substance abuse problem in Utah and the nation; all elements of the FDA Blueprint for Prescriber Education under the FDA's Extended-Release and Long-Acting Opioid Analgesics Risk Evaluation and Mitigation Strategy, as published 09 July 2012, or as it may be subsequently revised; the national and Utah-specific resources available to prescribers to assist in appropriate controlled substance and opioid prescribing; patient record documentation for controlled substance and opioid prescribing; and office policies, procedures, and implementation. | 5,620 9 | |
| Utah Osteopathic | 40 CMEs every 2 years. 34 CMEs must be AMA PRA Category 1. 6 CMEs may be from Division of Occupational and Professional Licensing. | 3.5 CMEs every 2 years on controlled substance prescribing. The 3.5 CMEs shall include: the scope of the controlled substance abuse problem in Utah and the nation; all elements of the FDA Blueprint for Prescriber Education under the FDA's Extended-Release and Long-Acting Opioid Analgesics Risk Evaluation and Mitigation Strategy, as published 09 July 2012, or as it may be subsequently revised; the national and Utah-specific resources available to prescribers to assist in appropriate controlled substance and opioid prescribing; patient record documentation for controlled substance and opioid prescribing; and office policies, procedures, and implementation. | 1,183 | |
| Vermont Medical | 30 AMA PRA Category 1 CMEs every 2 years | One CME (of the 30) every licensing period for all licensees shall be on the topic of hospice care, palliative care, or pain management services, or a combination of these. One additional CME on the appropriate use of opioids, including the use of complementary and alternative therapies instead of opioid controlled substances to treat chronic pain is required by licensees who prescribe or are likely to prescribe opioid controlled substances, as determined by the Board, every licensing period. | 3,739 2,6 | |
| Vermont Osteopathic | 30 CMEs every 2 years; a minimum of 12 CMEs must be osteopathic medical education | 2 hours of continuing education for each full licensing period on the topics of: the abuse and diversion, safe use, and appropriate storage and disposal of controlled substances; the appropriate use of the Vermont Prescription Monitoring System; risk assessment for abuse or addiction; pharmacological and nonpharmacological alternatives to opioids for managing pain; medication tapering and cessation of the use of controlled substances; and, relevant State and federal laws and regulations concerning the prescription of opioid controlled substance. | 260 | |
| Virginia | 60 CMEs every 2 years. At least 30 must be AMA PRA Category 1. | 2 CME (of the 60) related to pain management, proper prescribing of controlled substances, and the diagnosis and management of addiction every 2 years. | 44,844 | |
| Washington | For MDs, 200 CMEs every 4 years, at least 120 must be Category 1 credits (AMA PRA Category 1). For DOs,150 CMEs every 3 years, at least 60 must be Category 1 (AMA PRA Category 1 accepted). | For MDs: WSMA's one-hour webinar, “Preparing for New State Opioid Prescribing Rules”, fulfills the state CMEs on opioid prescribing. This activity has been approved for AMA PRA Category 1 Credit. Also, allopathic physician and PA prescribers should note that simply reading the new rules will meet the new state requirement for opioid continuing medical education.  For DOs: In order to prescribe an opioid in Washington state, an osteopathic physician licensed to prescribe opioids shall complete a one-time CME regarding best practices in the prescribing of opioids and the current opioid prescribing rules in this chapter. The continuing education must be at least one hour in length. WAC 246-853-685 | 12,470 9 | |
| West Virginia | For MDs, 50 AMA PRA Category 1 CMEs every 2 years, 30 of which must be related to the provider's area or areas of specialty. For DOs, 32 CMEs every 2 years, 16 of which must be AOA 1-A or 1B. | Pain specialists need to have 30 pain-related CMEs every 2 years. Further, for all providers, unless they have completed and timely provided to the Board a Board-developed certification form and waiver request attesting that he or she has not prescribed, administered, or dispensed a controlled substance during the entire previous reporting period, every physician as a prerequisite to license renewal shall complete a minimum of 3 CMEs of drug diversion training and best practice prescribing of controlled substances training during the previous reporting period, of which 3 such CMEs may be provided only by a Board-approved program | 3,220 5,6,9 | |
| Wisconsin | 30 AMA PRA Category 1 or AOA Category 1 CMEs every 2 years | 2 CMEs on the Wisconsin Medical Examining Board Opioid Prescribing Guideline during the 2016-2017 and 2018-2019 CME cycles | 10,170 9 | |

| Appendix D: Pain and Opioid CME Requirements for Physician Assistants | | | |
| --- | --- | --- | --- |
| **State Boards** | **Total CE Hours (CEs) Required** | **Pain and Opioid CE Requirements** | **Number of Affected Prescribers** |
| Alabama | 25 AMA PRA Category 1 CEs annually | To renew a Qualified Alabama Controlled Substances Certificate: Must have 4 AMA PRA Category 1 CEs every 2 years (after original 12 hours of state-sponsored CEs). The courses must be pre-approved by the Board. The initial 12 CEs include: 8 AMA PRA Category 1 CEs from "Prescribing Controlled Drugs; Critical Issues and Common Pitfalls"; and, 4 AMA PRA Category 1 CEs that include advanced pharmacology and prescribing trends relating to controlled substances. | 750 4,9 |
| Alaska | 50 AMA PRA Category 1 CEs every 2 years | For license renewals, at least 2 of the required CEs for renewal must be specific to pain management and opioid use and addiction. AMA PRA Category 1 CEs qualify. For a physician assistant, it may instead be earned in a NCCPA-approved continuing medical education program. | 623 |
| Arizona | 40 CEs every 2 years | A.R.S. § 32-3248.02 requires all healthcare professionals who hold Drug Enforcement Administration certifications to complete a minimum 3 CEs in an opioid-related, substance-use disorder related, or addiction related course each renewal cycle as part of the annual continuing education requirement for licensure. | 2,100 9 |
| Arkansas | 20 CEs annually. CEs hours do not have to be a particular category. | PAs authorized to prescribe Schedule II hydrocodone combination products reclassified from Schedule III to Schedule II (in 2014) must complete at least five (5) CE hours in the area of pain management. Each year, each physician and physician assistant shall obtain at least one (1) hour of CME credit specifically regarding the prescribing of opioids and benzodiazepines. Within the first two (2) years of licensure, a prescriber shall obtain a minimum of three (3) hours of prescribing education approved by the Arkansas State Medical Board. | 511 |
| Connecticut | 100 CEs every 2 years, 50 of which must be Category 1 (This mirrors the CE requirement of the National Commission on Certification of Physician Assistants (NCCPA)). | Connecticut licensed physician assistants must complete not less than 1 CE in prescribing controlled substances and pain management during each two-year renewal period. | 2,300 9 |
| Florida Medical | 100 CEs every 2 years | Prescribing PAs must have 3 CEs every 2 years on safe and effective prescribing of controlled substances.  In addition to the above requirements, prescribing physician assistants must complete 10 hours of CEs in each specialty area of the supervising physician. These hours are included in the general CEs. Effective 01 January 2017, 3 of the 10 specialty hours must consist of a course on the safe and effective prescribing of controlled substance medications given by a statewide professional association of physicians in this state accredited to provide educational activities designated for the American Medical Association Physician’s Recognition Award Category I credit or designated by the American Academy of Physician Assistants as a Category I credit. | 9,762 |
| Indiana | 100 CEs every 2 years | Effective 01 July 2019, pursuant to Senate Enrolled Act 225-2018, a practitioner, licensed by a board and applying for registration or re-registration to distribute or dispense a controlled substance, must have completed 2 CEs during the previous 2 years addressing the topic of opioid prescribing and opioid abuse. | 1,550 9 |
| Iowa | 100 AMA PRA Category 1 CEs every two years | A licensee who has prescribed opioids to a patient during the renewal cycle shall complete a minimum of 2 CEs regarding the guidelines for prescribing opioids for chronic pain, as issued by the Centers for Disease Control and Prevention of the United States Department of Health and Human Services, including recommendations on limitations on dosages and the length of prescriptions, risk factors for abuse, and nonopioid and nonpharmacologic therapy options, as a condition of license renewal. These CEs may count toward the 100 CEs required for license renewal. The licensee shall maintain documentation of these hours, which may be subject to audit. | 1,000 3 |
| Kentucky | 60 CEs every 3 years. Of the 60 CEs required, 30 must be AMA PRA Category 1 or AOA Category 1 by an organization accredited by the Accreditation Council on Continuing Medical Education or the AOA Council on Continuing Medical Education. | Minimum of 4.5 CEs of HB1 (House Bill 1) approved CEs for physicians authorized to prescribe or dispense controlled substances. The education must relate to the use of KASPER (their prescription monitoring program), pain management, addiction disorders, or a combination of two or more of those subjects. The requirement may be met with one 4.5 CE course or multiple courses totaling 4.5 CEs. | 1,070 9 |
| Louisiana | 100 CEs every 2 years | Practitioners with a Controlled Dangerous Substance (CDS) license are required to complete at least 3 Board-approved CEs on the best practices for the prescribing of CDS, drug diversion training, appropriate treatment for addiction, and the treatment of chronic pain. | 1,291 |
| Maine Medical | 100 CEs every 2 years | Effective 31 December 2017, 3 CEs of opioid prescribing required every 2 years for all clinicians that prescribe opioids. 3 CEs of any Category 1 AMA approved program on the prescribing of opioids will suffice | 720 2,9 |
| Maryland | 50 CEs every 2 years or maintenance of NCCPA certification | One-time requirement for 2 CEs if holding a CDS registration, starting 01 October 2018. Must relate to prescribing or dispensing controlled substances. Must be recognized by the provider's professional board or accredited by ACCME. | 7,268 |
| Massachusetts | 100 CEs every 2 years, 40 of which must be Category 1 | If prescribing controlled substances, must complete 4 CEs in the following topics: effective pain management; the risks of abuse and addiction associated with opioid medication; identification of patients at risk for substance use disorders; counseling patients about the side effects, addictive nature and proper storage and disposal of prescription medications; appropriate prescription quantities for prescription medications that have an increased risk of abuse; and opioid antagonists, overdose prevention treatments and instances in which a patient may be advised on both the use of and ways to access opioid antagonists and overdose prevention treatments. | 3,720 1,9 |
| Minnesota | 50 AMA PRA Category 1 CEs every 2 years or maintenance of NCCPA certification | Effective 01 January 2020, licensees with the authority to prescribe controlled substances obtain at least 2 CEs on best practices in prescribing opioids and controlled substances, including nonpharmacological and implantable device alternatives for treatment of pain and ongoing pain management, as part of the continuing education requirements for licensure renewal. | 1,980 9 |
| Mississippi | 50 CEs annually. Of the 50 CEs required, 20 must be AMA PRA Category 1. NCCPA certification waives requirement | 10 CEs of AMA, AOA, or AAPA Category 1 CEs related to prescribing medications, with emphasis on controlled substances required for PA authorized to prescribe controlled substances. | 200 9 |
| Nebraska | 50 CEs of ACCME, AOA, or AAPA Category 1 CEs every 2 years, or maintenance of NCCPA certification | Effective 01 October 2018, 3 hours every 2 years regarding prescribing opiates. This may include education regarding prescribing and administering opiates, risks and indicators regarding opiate addiction development and emergency opiate situations. 1/2 hour of the 3 shall cover the PDMP | 1,454 2 |
| Nevada Medical | 40 AMA PRA Category 1 CEs every 2 years. | 2 CEs relating specifically to the misuse and abuse of controlled substances, the prescribing of opioids, or addiction during each period of licensure. | 650 9 |
| New Hampshire | Must maintain NCCPA certification | All prescribers required to register with the program who possess a U.S. Drug Enforcement Administration (DEA) license number shall complete 3 CEs of free, appropriate prescriber's regulatory board-approved online continuing education or pass an online examination, in the area of pain management and addiction disorder or a combination, as a condition for license renewal. | 710 9 |
| New Jersey | 50 CEs every 2 years; must be Category 1 AMA, AAPA, AOA, or ACCME | Effective with 2019 and subsequent renewals, for all prescribers, 1 CE concerning prescription opioid drugs, including responsible prescribing practices, alternatives to opioids for managing and treating pain, and the risks and signs of opioid abuse, addiction, and diversion. | 2,810 9 |
| New Mexico Medical | Must maintain NCCPA certification | 5 CEs in pain management. Appropriate CEs should include: a review of NM Medical Board Rule 16.10.14 NMAC on pain management; an understanding of the pharmacology and risks of controlled substances; a basic awareness of the problems of abuse, addiction, and diversion; and awareness of state and federal regulations for the prescription of controlled substances. | 680 9 |
| New York | No general CE requirement; see Pain/Opioid CE. | All prescribers licensed to treat humans who have a DEA registration to prescribe controlled substances, as well as medical residents who prescribe controlled substances under a facility DEA registration, must complete at least 3 CEs in pain management, palliative care, and addiction. The following 8 topic areas MUST be included: New York State and federal requirements for prescribing controlled substances; pain management; appropriate prescribing; managing acute pain; palliative medicine; prevention, screening, and signs of addiction; responses to abuse and addiction; and end of life care. All 8 topics must be completed prior to attestation; the topics can be completed in a single presentation or in individual segments for a total of at least 3 hours. The coursework may be live, online, or obtained from a publication or journal. There is no minimum amount of time that must be spent on each of the eight topics. The CE does not have to be pre-approved, as prescribers merely complete an attestation saying that they completed the appropriate work. | 12,060 9 |
| North Carolina | 50 CEs of AAPA Category 1 CE every 2 years; active NCCPA certification waives requirement; NCCPA certification waives this requirement, but not the controlled substance requirement | Beginning 01 July 2017, 2 hours of CEs (that count toward the overall 50) specifically designed to address controlled substance prescribing practices. The CEs shall include instruction on controlled substances prescribing practices, recognizing signs of the abuse or misuse of controlled substances, and controlled substance prescribing for chronic pain management. | 5,010 9 |
| Ohio | 100 CEs every 2 years + 12 pharmacology every 2 years plus NCCPA certification | 12 pharmacology-specific CEs over and above the required 100 CEs in order to renew a Certificate to Prescribe. | 4,430 9 |
| Oklahoma Medical | 20 CEs annually | 1 CE each year shall be concerning the topic of substance abuse | 1,390 9 |
| Oregon | 60 CEs of AMA, APMA, AAPA, or AOA Category 1 or AOA Category 1A or 2A every 2 years | Within the first licensure year, licensees must complete CEs on pain management. A 1-hour course provided by the Oregon Pain Management Commission​​ is required plus at least 6 more CEs in the subjects of pain management or the treatment of terminally ill and dying patients. This is a 1-time requirement, but licensees may choose to obtain additional hours on these topics throughout their careers. Furthermore, the topic of pain management is legally considered relevant for all licensees, regardless of their specialty. | 2,152 |
| Pennsylvania Medical | Must hold current NCCPA certification. | 4 Board-approved CEs consisting of 2 CEs in pain management or the identification of addiction and 2 CEs in the practices of prescribing or dispensing of opioids; subsequent renewals require 2 CEs on pain management, identification of addiction, or prescribing practices. | 8,832 |
| Rhode Island | 20 CEs every 2 years | 8 CEs on topics such as: appropriate prescribing for pain, pharmacology, dependence, potential, and alternatives to opioids for pain management. Those who have taken DATA 2000 training to prescribe buprenorphine will be exempt from the 8 CEs. Training must be completed at least once per career and must occur before the next renewal of your controlled substance registration in June of 2018. | 588 |
| South Carolina | No requirement, except as noted for those prescribing controlled substances | 4 CEs every 2 years related to approved procedures of prescribing and monitoring controlled substances in Schedules II, III, and IV. | 1,430 9 |
| Tennessee | 100 CEs every 2 years | 2 CEs related to controlled substance prescribing, which must include instruction in the Department’s treatment guidelines (i.e., Tennessee Chronic Pain Guidelines) on opioids, benzodiazepines, barbiturates, and carisoprodol and may include topics such as medicine addiction, risk management tools, and other topics approved by the PA Committee. | 2,010 9 |
| Texas | 40 CEs every 2 years | Per Board rule 195.4(e), the medical director of a pain management clinic must, on an annual basis, ensure that all personnel (including the medical director) are properly licensed, and if applicable, trained to include 10 CEs related to pain management. This CE requirement applies to all personnel providing medical services to the patients (including, but not limited to: PAs, x-ray techs, phlebotomists, RNs, MAs, etc.). | 7,930 5,9 |
| Utah | 40 CEs every 2 years; NCCPA certification waives requirement | 3.5 CEs every 2 years on controlled substance prescribing. The 3.5 CEs shall include: the scope of the controlled substance abuse problem in Utah and the nation; all elements of the FDA Blueprint for Prescriber Education under the FDA's Extended-Release and Long-Acting Opioid Analgesics Risk Evaluation and Mitigation Strategy, published 09 July 2012, or as it may be revised; the national and Utah-specific resources available to prescribers to assist in appropriate controlled substance and opioid prescribing; patient record documentation for controlled substance and opioid prescribing; and office policies, procedures, and implementation. | 1,090 9 |
| Vermont | 100 CEs every 2 years, 50 of which must be Category 1; NCCPA certification waives this requirement | 2 hours of CE activity on controlled substances prescribing. The activity must be accredited as AMA PRA Category 1 CEs or American Academy of Physician Assistants Category 1 training. Required topics include: abuse and diversion, safe use, and appropriate storage and disposal of controlled substances; appropriate use of the Vermont Prescription Monitoring System; risk assessment for abuse or addiction; pharmacological and nonpharmacological alternatives to opioids for managing pain; medication tapering and cessation of the use of controlled substances; and, relevant State and federal laws and regulations concerning the prescription of opioid controlled substance. Each licensee who is registered with the D.E.A. and who holds a D.E.A. number to prescribe controlled substances, or who has submitted a pending application for one, is presumed to prescribe controlled substances and must meet this requirement. | 425 |
| Virginia | Must maintain NCCPA certification | 2 hours of AMA/PRA Category 1 CEs related to pain management, proper prescribing of controlled substances, and the diagnosis and management of addiction every 2 years. There is no exemption from this CE requirement for doctors of medicine, osteopathy, podiatry, physician assistants, and nurse practitioners who hold active licenses. | 3,958 |
| Washington Medical | 100 CEs every 2 years. A minimum of 40 CEs must be Category 1. NCCPA certification waives this requirement | If the practitioner prescribes opioids in Washington, they must complete a CE. The course is 1-time for at least one-hour. It must be completed by the end of your first full CE reporting period after 01 January 2019. WSMA's one-hour webinar, “Preparing for New State Opioid Prescribing Rules”, fulfills the new state requirement for CE on opioid prescribing. This activity has been approved for AMA PRA Category 1 Credit. Also, allopathic physician and PA prescribers should note that simply reading the new rules will meet the new state requirement for opioid continuing medical education. | 2,470 2,9 |
| West Virginia Medical | 100 CEs every 2 years; at least 50 must be Category 1 | A physician assistant who has prescribed, administered, or dispensed any controlled substance pursuant to a West Virginia license during the reporting period shall complete a Board-approved CE activity for a minimum of 3 hours of drug diversion training and best practice prescribing of controlled substances training. | 770 1,9 |

| Appendix E: Pain and Opioid CME Requirements for Podiatrists | | | |
| --- | --- | --- | --- |
| **State Boards** | **Total CE Hours (CEs) Required** | **Pain and Opioid CE Requirements** | **Number of Affected Prescribers** |
| Alabama | 12 CEs annually | All Alabama Controlled Substance Certificate holders must obtain 2 AMA PRA Category 1 or equivalent CEs every 2 years beginning in 2018. Acceptable CEs confer Credit in the areas of: controlled substance prescribing practices, recognizing signs of the abuse or misuse of controlled substances, or controlled substance prescribing for chronic pain management. No pre-approval of the courses is required. | 155 |
| Alaska | 50 AMA PRA Category 1 CEs every 2 years. Podiatrist credits may instead be earned in a CE program from a provider that is approved by the Council on Podiatric Medical Education (CPME). | For license renewals for those with a DEA registration, at least 2 of the total CEs required to qualify for renewal must be specific to pain management and opioid use and addiction. AMA PRA Category 1 education qualifies. | 29 |
| Arizona | 25 CEs annually | A.R.S. § 32-3248.02 requires all healthcare professionals who hold Drug Enforcement Administration certifications to complete a minimum 3 CEs in an opioid-related, substance-use disorder related, or addiction related course each renewal cycle as part of the annual continuing education requirement for licensure. | 429 |
| Florida | 40 CEs every 2 years | 2 CEs on prescribing controlled substances if holding DEA registration | 1,787 |
| Iowa | 40 CEs every 2 years | A licensee who has prescribed opioids to a patient during a renewal cycle shall have obtained a minimum of 1 CE regarding the United States Centers for Disease Control and Prevention guideline for prescribing opioids for chronic pain, including recommendations on limitations on dosages and the length of prescriptions, risk factors for abuse, and nonopioid and nonpharmacologic therapy options. | 243 3 |
| Kentucky | 20 CEs annually | Beginning on 01 July 2012, and annually thereafter, each podiatrist licensed by the board shall complete at least 1.5 CEs related to the use of the Kentucky All-Schedule Prescription Electronic Reporting System (KASPER), pain management, or addiction disorders. | 204 |
| Louisiana | 20 CEs annually | 3 CEs on opioid management required 1-time in career, starting in 2018, if prescribing, administering, or dispensing a controlled substance; otherwise exempt | 190 |
| Maine | 25 CEs every 2 years | 3 Category 1 CEs every 2 years on the prescribing of opioid medication as a condition of prescribing opioid medication. | 83 |
| Maryland | 50 CEs every 2 years | Podiatrists are required to complete 1 CE per renewal cycle on prescribing pain medications (starting 2018-2019). | 460 |
| Massachusetts | 15 MCEs annually | At least 1 CE in the previous one year shall be in pain management training, pursuant to St. 2010, c. 283. Pain management training shall include, but not be limited to: training how to identify patients at high risk for substance abuse, training how to counsel patients on the side effects, addictive nature, and proper storage and disposal of prescription medicines. | 544 |
| Michigan | 150 CEs every 3 years | 5 CEs in pain and symptom management in each renewal period pursuant to section 16204(2), MCL 333.16204(2), of the code. Courses in pain and symptom management may include, but are not limited to courses in: behavior management, pharmacology, behavior modification, stress management, clinical applications, and drug interventions as they relate to professional practice. | 806 |
| Minnesota | 40 CEs every 2 years | Effective 01 January 2020: Licensees with the authority to prescribe controlled substances obtain at least 2 CEs on best practices in prescribing opioids and controlled substances, including nonpharmacological and implantable device alternatives for treatment of pain and ongoing pain management, as part of the continuing education requirements for licensure renewal. | 250 |
| Mississippi | 40 CEs every 2 years | If the podiatrist has a current DEA certificate, 5 CEs of the 40 must be in the prescribing of controlled substances. | 96 |
| Nebraska | 48 CEs every 2 years | Effective 01 October 2018, 3 CEs every 2 years regarding prescribing opiates. This may include education regarding prescribing and administering opiates, risks and indicators regarding development of addiction to opiates, and emergency opiate situations. 1/2 hour of the 3 shall cover the PDMP. | 109 1 |
| Nevada | 50 CEs every 2 years | Each holder of a license to practice podiatry who is registered to dispense controlled substances pursuant to NRS 453.231 shall complete at least 2 CEs relating specifically to the misuse and abuse of controlled substances, the prescribing of opioids or addiction during each period of licensure. | 148 4 |
| New Jersey | 100 CEs every 2 years | Effective with 2019 and subsequent renewals, for all prescribers, 1 CE concerning prescription opioid drugs, including responsible prescribing practices, alternatives to opioids for managing and treating pain, and the risks and signs of opioid abuse, addiction, and diversion. | 1,220 |
| New Mexico | 16 CEs annually | 2 CEs in appropriate courses: an understanding of the pharmacology and risks on controlled substances; a basic awareness of the problems of abuse, addiction and diversion; awareness of state and federal regulations for the prescription of controlled substances; and management of the treatment of pain. Courses may also include a review of this rule (16.21.9 NMAC). | 369 |
| New York | 50 CEs every 3 years | All podiatrists (and any other person licensed under Title 8) who have a DEA registration number AND all residents prescribing with a facility DEA registration number will be REQUIRED to take 3 CEs approved by the DOH in pain management, palliative care and addiction. | 2,448 |
| North Carolina | 25 CEs annually | At least 1 CE consists of a course designed specifically to address prescribing practices. The course shall include, but not be limited to, instruction on controlled substance prescribing practices and controlled substance prescribing for chronic pain management. | 415 |
| Oregon | 60 CEs every 2 years | By 2009 or within the first year of licensure, licensees must complete CEs on pain management.  The requirements and exemptions are detailed in OAR 847-008-0075.  1 CE provided by the Oregon Pain Management Commission​​ is required plus at least 6 CEs in the subjects of pain management or the treatment of terminally ill and dying patients. | 173 |
| Pennsylvania | 50 CEs every 2 years | 2 CEs in pain management, the identification of addiction, or the practices of prescribing or dispensing of opioids. | 1,602 |
| South Carolina | 24 CEs every 2 years | If a podiatrist is authorized pursuant to state and federal law to prescribe controlled substances, 2 of the requisite biennial CEs must be related to approved procedures of prescribing and monitoring controlled substances listed in Schedules II, III, and IV of the schedules provided for in Sections 44-53-210, 44-53-230, and 44-53-250. | 200 |
| Tennessee | 15 CEs annually | 1 of the 15 required CEs shall, every other calendar year, be a course designed specifically to address prescribing practices | 230 |
| Texas | 50 CEs every 2 years | Per Board rule 195.4(e), the medical director of a pain management clinic must, on an annual basis, ensure that all personnel (including the medical director) are properly licensed, and if applicable, trained to include 10 hours of continuing medical education related to pain management. This requirement applies to all personnel providing medical services to the patients (including, but not limited to: PAs, x-ray techs, phlebotomists, RNs, MAs, etc.). | 1,152 5 |
| Utah | 40 CEs every 2 years | 3.5 CEs every 2 years on controlled substance prescribing. The 3.5 CEs shall include: the scope of the controlled substance abuse problem in Utah and the nation; all elements of the FDA Blueprint for Prescriber Education under the FDA's Extended-Release and Long-Acting Opioid Analgesics Risk Evaluation and Mitigation Strategy, as published 09 July 2012, or as it may be subsequently revised; the national and Utah-specific resources available to prescribers to assist in appropriate controlled substance and opioid prescribing; patient record documentation for controlled substance and opioid prescribing; and office policies, procedures, and implementation. | 244 |
| Vermont | 30 CEs every 2 years | All podiatry licensees who prescribe controlled substances shall certify at the time of each renewal that they have completed at least 2 CE activities on controlled substances prescribing. The CE must be accredited as AMA PRA Category 1 Credit training or Council on Podiatric Medical Education approved training. The following topics must be covered, as required by Vermont law: abuse and diversion, safe use, and appropriate storage and disposal of controlled substances; the appropriate use of the Vermont Prescription Monitoring System; risk assessment for abuse or addiction; pharmacological and nonpharmacological alternatives to opioids for managing pain; medication tapering and cessation of the use of controlled substances; and relevant State and federal laws and regulations concerning the prescription of opioid controlled substances. Each licensee who is registered with the U.S. Drug Enforcement Agency (D.E.A.) and who holds a D.E.A. number to prescribe controlled substances, or who has submitted a pending application for one, is presumed to prescribe controlled substances and must meet this requirement. Any podiatrist who is required to certify completion of this CE to renew, but who cannot, will be subject to the provisions regarding makeup of missing CE in 22.3 and 22.4. | 35 |
| Virginia | 60 CEs every 2 years | Every 2 years, licensees with prescriptive authority must complete 2 CEs in pain management, proper prescribing of controlled substances, and the diagnosis and management of addiction. | 543 |
| West Virginia | 50 CEs every 2 years | Unless a podiatrist has completed and timely provided to the Board a Board-developed certification waiver form attesting that he or she has not prescribed, administered, or dispensed a controlled substance during the entire previous reporting period, every podiatrist as a prerequisite to license renewal shall complete a minimum of 3 CEs of drug diversion training and best practice prescribing of controlled substances training during the previous reporting period. The 3 CEs shall be part of the 50 total hours of continuing education required and not 3 additional hours. | 115 1 |
| Wisconsin | 50 CEs every 2 years | 2 of the 50 podiatric CEs required under sub.(1) shall be an educational course or program related to opioid prescribing; only required if podiatrist holds DEA registration | 384 |

| Appendix F: Pain and Opioid CME Requirements for Naturopathic Physicians | | | |
| --- | --- | --- | --- |
| **State Boards** | **Total CE Hours (CEs) Required** | **Pain and Opioid CE Requirements** | **Number of Affected Prescribers** |
| Arizona | 30 CEs annually | 3 CEs opioid-related substance use disorder or addiction | 1,020 |
| California | 60 CEs every 2 years | There is a 1-time requirement of 12 CEs in pain management and care of the terminally ill (except for Pathologists and Radiologists) that must be completed by the physician's second license renewal date or within four years, whichever comes first. The 12 units may be divided in any way that is relevant to the physician's specialty and practice setting. The Medical Board will accept any combination of the two topics totaling 12 CEs. For physicians and surgeons licensed on or after 01 January 2019, the course must include the subject of risks of addiction associated with the use of Schedule II drugs. As an alternative to the above 12-hour requirement, a physician or surgeon may complete a 1-time CE of 12 hours in the subjects of treatment and management of opiate-dependent patients, including 8 hours of training in buprenorphine treatment, or other similar medicinal treatment, for opioid use disorders. | 915 |
| Minnesota | 25 CEs annually | At least 5 hours (of the 25) must be in pharmacotherapeutics. | Not available |
| Oregon | 32 CEs annually | 7 CEs on pain management, within the first 2 years of licensure | 1,090 |
| Vermont | 30 CEs every 2 years | 2 CEs for each full licensing period beginning on or after 08 June 2016 on the topics of: the abuse and diversion, safe use, and appropriate storage and disposal of controlled substances; the appropriate use of the Vermont Prescription Monitoring System; risk assessment for abuse or addiction; pharmacological and nonpharmacological alternatives to opioids for managing pain; medication tapering and cessation of the use of controlled substances; and, relevant State and federal laws and regulations concerning the prescription of opioid controlled substance. | 337 |

| Appendix G: Pain and Opioid CME Requirements for APRNs | | | |
| --- | --- | --- | --- |
| **State Boards** | **Total CE Hours (CEs) Required** | **Pain and Opioid CE Requirements** | **Number of Affected Prescribers** |
| Alabama | 24 CEs every 2 years | As a part of the 24 Board-approved or -recognized CEs for license renewal [610-X-4-.08], Certified Registered Nurse Practitioners (CRNP) and Certified Nurse Midwives (CNM) with prescriptive authority shall earn 6 CEs of pharmacology content specific to prescriptive practice in the approved area for collaborative practice. Certified Registered Nurse Anesthetists (CRNA) shall earn 6 CEs of pharmacology. | 3,680 4,9 |
| Alaska | 30 CEs every 2 years | For APRNs with general prescriptive authority, 15 CEs in advanced pharmacotherapeutics are required each licensing period. For those with Controlled Substances Prescriptive Authority (those holding a DEA registration), 2 additional CEs (beyond the 15) are required in pain management and opioid use each licensing period. | 440 6,9 |
| Arizona | 0 CEs every 4 years | A.R.S. § 32-3248.02 requires all healthcare professionals who hold Drug Enforcement Administration certifications to complete a minimum 3 of CEs in an opioid-related, substance-use disorder related, or addiction related courses each renewal cycle as part of the annual continuing education requirement for licensure. | 3,510 6.9 |
| Arkansas | 15 CEs (or National Certification) every 2 years | Initial Applicants: APRNs issued a certificate of prescriptive authority after 31 December 2015 shall obtain a minimum of 3 CEs of prescribing education which include information on maintaining professional boundaries and the prescribing rules, regulations and laws that apply to APRNs in the state of Arkansas within 2 years of issuance of the prescriptive authority certificate. Renewals: APRNs with prescriptive authority shall complete 5 pharmacotherapeutics CEs in the APRN’s area of certification each biennium prior to license renewal. Effective 01 January 2017, 2 of the 5 hours must contain information related to maintaining professional boundaries and the prescribing rules, regulations and laws that apply to APRNs in the State of Arkansas. | 1,900 4,9 |
| California | 30 CEs every 2 years | Nurse Practitioners (NPs) with Schedule II furnishing privileges must complete a 3-hour online Schedule II course through the CA Association for Nurse Practitioners. Certified Nurse Midwives (CNMs) with Schedule II furnishing privileges must complete a 2-hour online Schedule II course through the CA Association for Nurse-Midwives. | 13,420 4,9  NP  700 4,9  CNM |
| Connecticut | 50 CEs every 2 years | CEs shall: be in an area of the APRN’s practice; reflect the professional needs of the licensee in order to meet the health care needs of the public; include at least 5 contact hours of training or education in pharmacotherapeutics; and include at least 1 contact hour of training or education in substance abuse, including, but not limited to, prescribing controlled substances and pain management. | 5,382 |
| Delaware | National Certification plus 10 pharmacology CEs for APRN every 2 years | 3 hours related to substance abuse for all nurses (not just those with prescriptive authority). APRNs with authority to prescribe controlled substances must complete the 1-hour Mandatory training on Delaware law, regulation and programs on prescribing and distribution of controlled substances, and 10 CEs in pharmacology/pharmacotherapeutics in the past 2 years. | 760 9  APRN  11,840 9  RN |
| District of Columbia | 24 CEs every 2 years | APRNs must complete 15 CEs related to pharmacology (of the 24 required hours) | 840 9 |
| Florida | 24 CEs (or National Certification) every 2 years | 3 CEs of Safe and Effective Prescription of Controlled Substances for APRNs each licensing period. (Must be offered by a statewide professional association of physicians in this state accredited to provide educational activities designated for the American Medical Association Physician’s Recognition Award Category 1 credit, the American Nurses Credentialing Center, the American Association of Nurse Anesthetists, or the American Association of Nurse Practitioners and may be offered in a distance learning format.) | 31,183 |
| Hawaii | 30 CEs every 2 years | For APRN with prescriptive authority, 8 contact hours in pharmacology related to clinical practice specialty area and approved by a Board-recognized certifying body each licensing period. | 410 4,9 |
| Idaho | 30 CEs every 2 years | For APRN with prescriptive authority, 10 contact hours in pharmacology for license renewal. All new initial applicants must provide documentation of 30 hours of pharmacotherapeutic coursework (either formal academic education or CE). | 750 9 |
| Illinois | 20 CEs for RN and LPN; 80 CEs for APN every 2 years | APRNs shall obtain, each 2-year licensing period, no less than 20 CEUs of pharmacotherapeutics, including 10 hours of opioid prescribing or substance abuse education. | 5,540 9 |
| Indiana | 0 hours for RNs; 30 hours for APRNs every year | APRNs with prescriptive authority must include 8 hours in pharmacology. Effective 01 July 2019, a practitioner who is licensed by a board and applies for controlled substance registration or re-registration must have completed 2 hours of CEUs during the previous 2 years addressing the topic of opioid prescribing and opioid abuse. | 4,780 4,9 |
| Iowa | 36 CEs for RN or LPN; National Certification for APRN every 3 years | For ARPN who prescribed opioids to a patient during the renewal cycle: a minimum of 2 CEs regarding the CDC guideline for prescribing opioids for chronic pain (at each renewal). | 1,830 3,9 |
| Kentucky | 14 CEs or National Certification every 1 year | 5 contact hours of approved pharmacology CEs must be earned by all APRNs each licensure period. CE certificates should reflect specific pharmacology contact hours awarded. For APRNs with prescriptive authority for controlled substance, of the 5 approved pharmacology contact hours required for renewal, 1.5 of approved contact hours must be on the use of KASPER, pain management, or addiction disorders each licensure period. These hours may count as part of the required 5 pharmacology hours. | 3,572 6 |
| Louisiana | For RN, 5-15 CEs (depending on hours spent practicing); for APRNs whose role and population focus does not provide for certification/recertification, 30 contact hours related to advanced practice nursing every 1 year | Each year an APRN with prescriptive authority shall obtain 6 contact hours of CEs in pharmacotherapeutics in their advanced nursing role and population foci. | 2,820 4,9 |
| Maine | 0 CEs for RN and LPN; 75 CEs for APRN every 2 years | 15 contact hours of CEs in pharmacology every two years | 1,240 9 |
| Maryland | 0 CEs for RNs; National Certification for APRN every 2 years | 1-time requirement for 2 hours if holding a CDS registration, starting 01 October 2018. Must relate to prescribing or dispensing of controlled substances. Must be recognized by the provider's professional board or accredited by ACCME. | 3,710 4,9 |
| Massachusetts | 15 CEs for RN and LPN; National Certification for APRN every 2 years | To apply for prescriptive authority from MA Controlled Substance Registration (MCSR) and to renew APRN authorization every 2 years, all prescribers must complete education relative to: effective pain management; risks of abuse and addiction associated with opioid medication; identification of patients at risk for substance use disorders; counseling patients about the side effects, addictive nature and proper storage and disposal of prescription medications; appropriate prescription quantities for prescription medications that have an increased risk of abuse; and, opioid antagonists, overdose prevention treatments and instances in which a patient may be advised on both the use of and ways to access opioid antagonists and overdose prevention treatments. M.G.L. c. 94C s.18(e) does not specify a minimum number of contact hours to comply with this education requirement. | 6,200 1,9 |
| Michigan | 25 CEs for RNs; National Certification for APRN every 2 years | Each licensing period, every nurse (both with and without prescriptive authority) must complete at least two 2 CE in pain and symptom management, in courses or programs approved by the Board. These count toward the 25 CE requirement. | 22,596  APRN  155,436  RN |
| Minnesota | 24 CEs for RN; 12 CEs for LPN; National Certification for APRN every 2 years | Effective 01 January 2020: Licensees with the authority to prescribe controlled substances obtain at least 2 CEs on best practices in prescribing opioids and controlled substances, including nonpharmacological and implantable device alternatives for treatment of pain and ongoing pain management, as part of the CE requirements for licensure renewal. | 7,780 |
| Mississippi | 0 CEs for RN; 40 CEs for APRN every 2 years | For APRNs, 2 of the 40 CEs must be related to the prescribing of controlled substances. | 6,703 |
| Montana | 24 CEs every 2 years | For APRNs with prescriptive authority, 12 (of the 24) CEs must be in the area of pharmacotherapeutics. | 640 4,9 |
| Nebraska | 20 CEs for RN and LPN; 40 CEs for APRN-NP /every 2 years | 10 CEs related to pharmacology for APRN-NP. Effective 01 October 2018, 3 CEs every 2 years regarding prescribing opiates. This may include education regarding prescribing and administering opiates, risks and indicators regarding development of addiction to opiates, and emergency opiate situations. 1/2 hour of the 3 shall cover the PDMP. | 2,288 6 |
| Nevada | 30 CEs for RNs; 45 CEs for APRNs every 2 years | APRNs that have dispensing or prescribing privileges must complete 2 CEs related to the use and misuse of controlled substances also within each renewal period. | 710 4,9 |
| New Hampshire | 30 CEs for RN and LPN; 30 additional CEs (60 total) related to specialty for APRN every 2 years (For APRN, current certification in specialty will meet requirements for 30 CEs for RN licensure) | For all APRNs, 5 CEs must be related to pharmacology. For APRNs with an active DEA number for prescribing, 3 of the 5 CEs must address opioid prescribing, pain management, or substance abuse disorder. | 1,140 6,9 |
| New Jersey | 30 CEs for RN and LPN; National Certification for APN every 2 years | All professional nurses, practical nurses, and certified nurse midwives: 1 CE each licensing period related to prescription opioid drugs, including alternatives to opioids for managing and treating pain, and the risks and signs of opioid abuse, addiction, and diversion. Advanced Practice Nurses: 6 CEs in pharmacology related to controlled substances, including pharmacologic therapy, addiction prevention and management, and issues concerning prescription opioid drugs, including responsible prescribing practices, alternatives to opioids for managing and treating pain, and the risks and signs of opioid abuse, addiction, and diversion. | 4,000 |
| New Mexico | 30 CEs for RN and LPN; 50 CEs for APRN every 2 years | 15 CEs related to pharmacology for all APRNs each licensing period. For APRNs with DEA registration and prescriptive authority, 5 of 15 pharmacology hours must be related to management of non-cancer or chronic pain. | 980 6,9 |
| New York | 0 CEs for RN; National Certification for APRN every 2 years | All NY practitioners with a DEA registration number to prescribe controlled substances are required to complete at least 3 CEs of course work or training in pain management, palliative care, and addiction by 01 July 2017, and once every 3 years thereafter. | 13,710 9 |
| North Carolina | 15-30 CEs for RNs (depending on other activities) every 2 years.  50 CEs for APRNs (depending on other activities) every 2 years. | For those Nurse Practitioners who prescribe controlled substances, at least 1 CE (of the 50) shall address controlled substance prescribing practices, signs of the abuse or misuse of controlled substances, and controlled substance prescribing for chronic pain management. | 4,760 1,9 |
| North Dakota | 12 CEs every 2 years, plus National Certification for APRN | 15 CEs related to pharmacology for APRN with prescriptive authority (fulfills the 12 CE renewal requirement) | 1,183 |
| Ohio | 24 CEs for RNs; 48 CEs (36 for those with National Certification) for APRNs | For an APRN-CNP, APRN-CNS, or APRN-CNM, at least 12 of the total required CEs must include CE in advanced pharmacology. | 16,760 |
| Oklahoma | RNs must meet 1 of 5 options for license renewal. One option is 24 CEs every 2 years. National Certification for APRNs. | 15 contact hours or 1 academic credit hour related to pharmacology for CNP, CNM, CNS with prescriptive authority each licensing period. | 1,590 4,9 |
| Oregon | National certification for APRN. If not certified, then 45 CEs every 2 years; for CNS who isn't certified, 40 CEs every 2 years. | 1-time requirement of 7 CEs related to pain management for RN, LPN, and APRN (1 hour must be a course to be provided by the Oregon Pain Management Commission. The remaining six hours can be nurse's choice of pain management topics.). Of the 45 hours required for an APRN, 15 must be focused on pharmacotherapeutic content. | 5,559 APRN  64,093  RN  5,728  LPN |
| Pennsylvania | 30 CEs for RN, CNS, and CRNP every 2 years | 16 CEs related to pharmacology for CRNP with Prescriptive Authority each licensing period. CRNPs with prescriptive authority approval must complete a one-time requirement of 2 CE in pain management, the identification of addiction and 2 CE in the practices of prescribing or dispensing of opioids. | 7,280 4,9 |
| Rhode Island | 10 CEs for RN and LPN; National Certification for APRN every 2 years | 2 of the 10 CEs required must be about substance abuse. | 13,320 9 |
| South Carolina | 0 CEs every 2 years for APRN, plus National Certification. | APRNs with prescriptive authority will need 45 contact hours of pharmacotherapeutics at initial licensure (15 of which must be in controlled substance pharmacology for NPs wishing to prescribe these drugs). | 2,260 4,9 |
| Tennessee | 0 CEs every 2 years for APRN, plus National Certification. | 2 CEs designed specifically to address controlled substance prescribing practices including the Tennessee Chronic Pain Guidelines. | 7,010 4,9 |
| Texas | 20 CES every 2 years or National Certification. | Per Board rule 195.4(e), the medical director of a pain management clinic must, on an annual basis, ensure that all personnel (including the medical director) are properly licensed, and if applicable, trained to include 10 hours of continuing medical education (CE) related to pain management. This CE requirement applies to all personnel providing medical services to the patients (including, but not limited to: PAs, x-ray techs, phlebotomists, RNs, MAs, etc.). Furthermore, Advance Practice Nurses (APNs) are required to complete CE within their advanced specialty area and role recognized by the BON. APNs with limited prescriptive authority must also complete an additional five contact hours in pharmacotherapeutics. APRNs that have prescriptive authority and prescribe controlled substances must complete at least 3 additional contact hours of continuing education related to prescribing controlled substances. | 12,020 5,6,9 |
| Utah | 30 CEs, or 200 practice hours and 15 CEs, or 400 practice hours every 2 years | 3.5 CEs every 2 years on controlled substance prescribing. The 3.5 CEs shall include: the scope of the controlled substance abuse problem in Utah and the nation; all elements of the FDA Blueprint for Prescriber Education under the FDA's Extended-Release and Long-Acting Opioid Analgesics Risk Evaluation and Mitigation Strategy, as published 09 July 2012, or as it may be subsequently revised; the national and Utah-specific resources available to prescribers to assist in appropriate controlled substance and opioid prescribing; patient record documentation for controlled substance and opioid prescribing; and office policies, procedures, and implementation. | 2,158 7 |
| Vermont | 0 CEs every 2 years; National Certification for APRN | 2 CEs for each full licensing period beginning on or after 08 June 2016 on the topics of: abuse and diversion, safe use, and appropriate storage and disposal of controlled substances; appropriate use of the Vermont Prescription Monitoring System; risk assessment for abuse or addiction; pharmacological and nonpharmacological alternatives to opioids for managing pain; medication tapering and cessation of the use of controlled substances; and, relevant state and federal laws and regulations concerning the prescription of opioid controlled substance. | 992 |
| Virginia | 15 CEs and 640 practice hours (or 30 contact hours) every 2 years for RN and LPN; National certification for Nurse Practitioner licensed after 08 May 2002 (if licensed as an NP before 08 May 2002, certification or 40 contact hours related to specialty area is required) | 2 CEs related to pain management, proper prescribing of controlled substances, and the diagnosis and management of addiction every 2 years. There is no exemption from this CE requirement for doctors of medicine, osteopathy, podiatry, physician assistants, and nurse practitioners who hold active licenses. APRNs with prescriptive authority must also have 8 CEs in pharmacology or pharmacotherapeutics for each biennium. | 10,038 4 |
| Washington | 531 practice hours and 45 contact hours every 3 years for RN and LPN; National Certification, 30 contact hours, and 250 independent clinical practice hours for ARNP | 15 additional contact hours in pharmacotherapeutics for all ARNPs with prescriptive authority each licensing period. Under new law (WAC 246-840-4655), in order to prescribe an opioid, an ARNP licensed to prescribe opioids shall complete a 1-time continuing education requirement regarding best practices in the prescribing of opioids that is at least 4 hours in length. The 1-time continuing education requirement by the end of the first full continuing education reporting period after 01 January 2019, or during the first full continuing education reporting period after initial licensure, whichever is later. | 3,430 9 |
| West Virginia | 12 CEs per 1 year for RN; 24 CEs and 400 practice hours every 2 years for LPN; 24 CEs every 2 years for APRNs | 3 CEs initially and then 1 contact hour, thereafter, annually of CE for best prescribing and drug diversion training if you prescribe, administer or dispense controlled substances. APRNs must obtain 12 hours in pharmacotherapeutics (out of the 24 total required). | 1,080 4,9 |
| Wisconsin | 0 CEs every 2 years | Advanced Practice Nurse Prescribers: 16 contact hours per biennium in clinical pharmacology or therapeutics relevant to the area of practice, including at least 2 contact hours in responsible prescribing of controlled substances. | 3,030 9 |
| Wyoming | 30 hours, or 15 hours and 200 hours of employment, or 400 hours of employment; In addition, for APRN, either National Certification, or 60 contact hours of CEs in practice area and 400 hours of employment. | APRNs with prescribing authority must obtain 15 CE in pharmacology and clinical management of drug therapy or pharmacotherapeutics per biennium. | 568 7 |

| Appendix H: Pain and Opioid CME Requirements for Dentists | | | |
| --- | --- | --- | --- |
| **State Boards** | **Total CE Hours (CEs) Required** | **Pain and Opioid CE Requirements** | **Number of Affected Prescribers** |
| Alabama | 20 CEs annually | Effective 02 March 2019: 2 CEs on prescribing controlled substances every 4 years | 1,160 9 |
| Alaska | 32 CEs every 2 years | For license renewals for those with a DEA registration, at least 2 of the total CEs required to qualify for renewal must be specific to pain management and opioid use and addiction. AMA PRA Category 1 education qualifies. | 787 |
| Arizona | 72 CEs every 3 years | A.R.S. § 32-3248.02 requires all healthcare professionals who hold Drug Enforcement Administration certifications to complete a minimum of 3 CEs in an opioid-related, substance-use disorder related, or addiction related course each renewal cycle as part of the annual continuing education requirement for licensure. | 2,520 9 |
| Connecticut | 25 CEs every 2 years | The 25 CEs shall include not less than 1 CE in any 3 of the 10 mandatory topics for continuing education activities prescribed by the Commissioner; infection control in a dental setting; and prescribing controlled substances and pain management. The 10 mandatory CE topics are: prescribing controlled substances and pain management, record keeping/risk management, infection control, access to care, HIPAA compliance, medical emergencies in the dental office (including current training in CPR), sexual assault and domestic abuse, cultural competence, mental health conditions common to veterans, and diagnostic technology. | 3,460 |
| Florida | 30 CEs every 2 years | 2 CEs every 2 years on the safe and effective prescribing of controlled substance medications | 15,552 |
| Georgia | 40 CEs every 2 years | 1 CE (of the 40) on the impact of opioid abuse and/or the proper prescription writing and use of opioids in dental practice | 5,888 |
| Iowa | 30 CEs every 2 years | If prescribing opioids, must complete at least 1 CE (of the 30) in the area of opioids. The training shall include the following: guidelines for prescribing opioids, including recommendations on limitations of dosages and the length of prescriptions; risk factors for abuse; and nonopioid and nonpharmacologic therapy options. | 2,170 2 |
| Kentucky | 30 CEs every 2 years | 3 CE (of the 30) related to the use of KASPER, pain management, or addiction disorders | 3,869 |
[truncated: 19,482 more chars]
